# Supplementary material for: Analysis of Immune Gene Expression Subtypes Reveals Osteosarcoma Immune Heterogeneity
Source: Hindawi journal article supplement (doi:10.1155/2021/6649412), 2021-03-01
Supplement: f1 [file 6649412.f1.zip]

| k | cluster | item             | itemConsensus |
|---|---------|------------------|---------------|
| 5 | 2       | TARGET.40.PALZGU | 0.615842      |
| 5 | 1       | TARGET.40.0A4I4M | 0.891628      |
| 5 | 1       | TARGET.40.PANXSC | 0.897001      |
| 5 | 1       | TARGET.40.PASEBY | 0.817874      |
| 5 | 1       | TARGET.40.PASRNE | 0.800396      |
| 5 | 1       | TARGET.40.PASYUK | 0.899285      |
| 5 | 1       | TARGET.40.PATMIF | 0.899902      |
| 5 | 1       | TARGET.40.PAUTWB | 0.89515       |
| 5 | 1       | TARGET.40.0A4I5B | 0.896253      |
| 5 | 1       | TARGET.40.0A4I48 | 0.879788      |
| 5 | 1       | TARGET.40.PAPIJR | 0.942707      |
| 5 | 1       | TARGET.40.PAVCLP | 0.784241      |
| 5 | 2       | TARGET.40.PAMHYN | 0.740712      |
| 5 | 1       | TARGET.40.PALKGN | 0.891221      |
| 5 | 1       | TARGET.40.PANZHX | 0.863913      |
| 5 | 1       | TARGET.40.PALECC | 0.782471      |
| 5 | 1       | TARGET.40.PAMRHD | 0.791322      |
| 5 | 2       | TARGET.40.PAKZZK | 0.740447      |
| 5 | 2       | TARGET.40.0A4I8U | 0.782576      |
| 5 | 1       | TARGET.40.PAPFLB | 0.733918      |
| 5 | 2       | TARGET.40.PAMJXS | 0.810648      |
| 5 | 2       | TARGET.40.0A4I4O | 0.784839      |
| 5 | 2       | TARGET.40.PATPBS | 0.803796      |
| 5 | 2       | TARGET.40.0A4I9K | 0.809842      |
| 5 | 2       | TARGET.40.0A4HX8 | 0.67635       |
| 5 | 2       | TARGET.40.PARKAF | 0.741289      |
| 5 | 1       | TARGET.40.PASFCV | 0.861495      |
| 5 | 2       | TARGET.40.PATEEM | 0.769505      |
| 5 | 2       | TARGET.40.PAMYYJ | 0.821633      |
| 5 | 1       | TARGET.40.PASNZV | 0.836503      |
| 5 | 1       | TARGET.40.PAPXGT | 0.850012      |
| 5 | 5       | TARGET.40.PAUTYB | 0.784076      |
| 5 | 1       | TARGET.40.PASUUH | 0.827084      |
| 5 | 1       | TARGET.40.PATJVI | 0.890735      |
| 5 | 1       | TARGET.40.0A4HMC | 0.891676      |
| 5 | 5       | TARGET.40.PAPWWC | 0.763665      |
| 5 | 5       | TARGET.40.0A4I42 | 0.801469      |
| 5 | 5       | TARGET.40.PARDAX | 0.80032       |
| 5 | 5       | TARGET.40.PATMPU | 0.790597      |
| 5 | 5       | TARGET.40.PATMXR | 0.794421      |
| 5 | 5       | TARGET.40.PARFTG | 0.756941      |
| 5 | 2       | TARGET.40.PARGTM | 0.813091      |
| 5 | 3       | TARGET.40.PATAWV | 0.929376      |
| 5 | 3       | TARGET.40.PANSEN | 0.929209      |
| 5 | 3       | TARGET.40.PAMHLF | 0.924689      |
| 5 | 2       | TARGET.40.0A4I65 | 0.805922      |
| 5 | 2       | TARGET.40.0A4I3S | 0.626785      |
| 5 | 2       | TARGET.40.0A4HY5 | 0.758633      |
| 5 | 3       | TARGET.40.PALWWX | 0.823563      |
| 5 | 3       | TARGET.40.PANVJJ | 0.927992      |
| 5 | 3       | TARGET.40.PAUBIT | 0.924498      |

|   |   |                  |          |
|---|---|------------------|----------|
| 5 | 2 | TARGET.40.PANGPE | 0.900555 |
| 5 | 2 | TARGET.40.OA4HXS | 0.749412 |
| 5 | 3 | TARGET.40.PANZZJ | 0.826891 |
| 5 | 2 | TARGET.40.PANPUM | 0.70506  |
| 5 | 5 | TARGET.40.PATUXZ | 0.737507 |
| 5 | 5 | TARGET.40.PAKUZU | 0.576886 |
| 5 | 5 | TARGET.40.PARBGW | 0.822419 |
| 5 | 5 | TARGET.40.PAPNVD | 0.593077 |
| 5 | 1 | TARGET.40.OA4HLD | 0.259002 |
| 5 | 3 | TARGET.40.PANMIG | 0.967279 |
| 5 | 3 | TARGET.40.PAMEKS | 0.929396 |
| 5 | 3 | TARGET.40.PARJXU | 0.933366 |
| 5 | 2 | TARGET.40.PANGRW | 0.796645 |
| 5 | 2 | TARGET.40.PASSLM | 0.792764 |
| 5 | 4 | TARGET.40.OA4IOW | 0.731037 |
| 5 | 3 | TARGET.40.OA4IOQ | 0.897739 |
| 5 | 3 | TARGET.40.PAVECB | 0.834926 |
| 5 | 3 | TARGET.40.OA4I6O | 0.896037 |
| 5 | 3 | TARGET.40.OA4I4E | 0.748544 |
| 5 | 5 | TARGET.40.PALHRL | 0.478263 |
| 5 | 5 | TARGET.40.PAKFVX | 0.588245 |
| 5 | 4 | TARGET.40.PAVDTY | 0.836706 |
| 5 | 5 | TARGET.40.PAPKWD | 0.786927 |
| 5 | 4 | TARGET.40.PAMLKS | 0.821126 |
| 5 | 4 | TARGET.40.PAUXPZ | 0.851578 |
| 5 | 5 | TARGET.40.PAUVUL | 0.719486 |
| 5 | 4 | TARGET.40.PAUYTT | 0.877426 |
| 5 | 4 | TARGET.40.PASEFS | 0.63147  |
| 5 | 4 | TARGET.40.PALFYN | 0.878819 |
| 5 | 4 | TARGET.40.PAUUML | 0.868098 |
| 5 | 4 | TARGET.40.PATKSS | 0.861229 |
| 5 | 4 | TARGET.40.PAVALD | 0.88439  |
| 5 | 4 | TARGET.40.PAMTCM | 0.819783 |
| 5 | 4 | TARGET.40.PAKXLD | 0.85535  |
| 5 | 4 | TARGET.40.PASKZZ | 0.888983 |
| 5 | 5 | TARGET.40.PALKDP | 0.41724  |
