# Supplementary material for: Analysis of Immune Gene Expression Subtypes Reveals Osteosarcoma Immune Heterogeneity
Source: Hindawi journal article supplement (doi:10.1155/2021/6649412), 2021-03-01
Supplement: f1 [file 6649412.f1.zip]

| features     | TARGET.4C |
|--------------|-----------|-----------|-----------|-----------|-----------|-----------|-----------|-----------|
| Adipocytes   | 0         | 0.0011    | 0.0025    | 0.0013    | 0         | 0         | 0         | 0.0128    |
| Astrocytes   | 0         | 0         | 0         | 0         | 0         | 0         | 0         | 0         |
| B-cells      | 0         | 0         | 0         | 0         | 0.0044    | 0         | 0         | 0         |
| Basophils    | 0.3163    | 0.0143    | 0.0376    | 0.0182    | 0.0067    | 0.0012    | 0         | 0         |
| CD4+ T-α     | 0         | 0         | 0         | 0         | 0         | 0         | 0         | 0         |
| CD4+ Tcm     | 0.006     | 0         | 0.0067    | 0         | 0         | 0         | 0.0057    | 0.0057    |
| CD4+ Terr    | 0.0025    | 0.0532    | 0.0054    | 0.0194    | 0.0108    | 0.0011    | 0.0101    | 0.0048    |
| CD4+ mer     | 0         | 0         | 0         | 0.001     | 0.0043    | 0         | 0         | 0         |
| CD4+ naiv    | 0         | 0         | 0         | 0         | 0         | 0         | 0         | 0         |
| CD8+ T-α     | 0         | 0         | 0         | 7.00E-04  | 0.0042    | 0         | 0         | 0.0052    |
| CD8+ Tcm     | 0         | 0         | 0         | 0.0234    | 0         | 0         | 0         | 0         |
| CD8+ Terr    | 0         | 0         | 0         | 0         | 0         | 0         | 0         | 0         |
| CD8+ naiv    | 0         | 0.0096    | 4.00E-04  | 0.0076    | 0.011     | 0         | 0         | 0         |
| CLP          | 0.0035    | 0.0161    | 0         | 0.0122    | 0.0303    | 0.0155    | 0.0128    | 0.0056    |
| CMP          | 0         | 7.00E-04  | 0         | 0         | 0         | 0.0019    | 8.00E-04  | 0.0016    |
| Chondrocy    | 0         | 0.0251    | 0.023     | 0.041     | 0.1086    | 0.1082    | 0.039     | 0.1896    |
| Class-switc  | 0.0179    | 0         | 0.0114    | 0         | 0.0143    | 0         | 0.0182    | 0         |
| DC           | 0         | 0.0082    | 1.00E-04  | 3.00E-04  | 0         | 0.0131    | 0         | 0         |
| Endothelial  | 0         | 0.059     | 0.0645    | 0.0151    | 0.0116    | 0.0207    | 0.1748    | 0.0613    |
| Eosinophils  | 0         | 0         | 8.00E-04  | 0         | 0         | 0         | 0.0073    | 0         |
| Epithelial c | 0.0085    | 0.0259    | 0.0166    | 0.002     | 0.0249    | 0.0167    | 0.0012    | 0.0243    |
| Erythrocyte  | 0         | 0         | 0         | 0         | 0         | 0         | 0         | 0         |
| Fibroblasts  | 0.0276    | 0.0912    | 0.1644    | 0.1501    | 7.00E-04  | 0.181     | 0.1288    | 0.2184    |
| GMP          | 0         | 0         | 0         | 0         | 0         | 0         | 0         | 0         |
| HSC          | 0.187     | 0.1706    | 0.155     | 0.0718    | 0.0038    | 0.1158    | 0.1399    | 0.1451    |
| Hepatocyte   | 0         | 2.00E-04  | 1.00E-04  | 0         | 0         | 2.00E-04  | 0         | 0         |
| Keratinocyt  | 0         | 0         | 0         | 0         | 0.004     | 0         | 0         | 0         |
| MEP          | 0         | 0.0341    | 0.0471    | 0.0333    | 0.0695    | 0.0411    | 0.0088    | 0.0329    |
| MPP          | 0         | 0         | 0         | 0         | 0         | 0         | 0         | 0         |
| MSC          | 0.2853    | 0.0424    | 0.0502    | 0.0107    | 0.0684    | 0.2089    | 0.2509    | 0.0029    |
| Macrophag    | 0         | 0.0823    | 0.0095    | 0.043     | 0.0151    | 0         | 0.0199    | 0.026     |
| Macrophag    | 0         | 0.0554    | 0.0111    | 0.0433    | 0.0185    | 0.0091    | 0.011     | 0.0327    |
| Macrophag    | 0.0057    | 0.0228    | 8.00E-04  | 0.023     | 0         | 0         | 0.0353    | 0.0154    |
| Mast cells   | 0         | 0.013     | 0.0071    | 0         | 0         | 0.0023    | 0         | 0         |
| Megakaryoc   | 0         | 0.0027    | 0.0013    | 4.00E-04  | 4.00E-04  | 0.002     | 0.0045    | 9.00E-04  |
| Melanocyte   | 0.0078    | 0.0024    | 0.0012    | 0.0073    | 0.007     | 0.0067    | 0.0046    | 0.0103    |
| Memory B     | 0         | 0         | 0         | 0         | 0.0125    | 0         | 0         | 0         |
| Mesangial    | 0         | 0.0082    | 0.0145    | 0         | 0         | 0         | 0         | 0.0408    |
| Monocytes    | 0         | 0.058     | 0         | 0.0175    | 0.0081    | 0.0259    | 0.0182    | 0.0132    |
| Myocytes     | 0.0199    | 0.0246    | 1.00E-04  | 0.1788    | 0.1294    | 0.0067    | 0         | 0.0193    |
| NK cells     | 0         | 0         | 0         | 0         | 0         | 0         | 0         | 0         |
| NKT          | 0.0331    | 0.0328    | 0.039     | 0.0152    | 0.0423    | 0.0943    | 0.0405    | 0.1175    |
| Neurons      | 0.013     | 0         | 0.0068    | 0.0019    | 3.00E-04  | 9.00E-04  | 0.0019    | 0.002     |
| Neutrophil   | 0         | 0         | 0         | 0         | 2.00E-04  | 0.0017    | 0         | 0         |
| Osteoblast   | 0         | 0.0413    | 0         | 0.0532    | 0.0486    | 0.0218    | 0         | 0         |
| Pericytes    | 0         | 0.008     | 0.0713    | 0         | 0         | 0.0387    | 0.022     | 0         |
| Plasma cell  | 0.0123    | 0.0277    | 0.0199    | 0.0127    | 0.0103    | 0.0206    | 0.0039    | 0.0036    |
| Platelets    | 0         | 0         | 0         | 0         | 0         | 0         | 0         | 0         |
| Preadipocy   | 0         | 0         | 0         | 0         | 0.0833    | 0         | 0         | 0         |
| Sebocytes    | 0         | 0         | 0         | 0         | 0.008     | 4.00E-04  | 0         | 0         |
| Skeletal m   | 0         | 0.0036    | 0         | 0.1318    | 0.0567    | 0         | 0         | 0         |

|             |        |        |        |        |          |        |        |        |
|-------------|--------|--------|--------|--------|----------|--------|--------|--------|
| Smooth mi   | 0      | 0.0988 | 0.1183 | 0.2181 | 0.1683   | 0.1684 | 0.1559 | 0.1642 |
| Tgd cells   | 0      | 0      | 0      | 0      | 0        | 0      | 0      | 0      |
| Th1 cells   | 0      | 0.0014 | 0.0244 | 0.0128 | 0.0263   | 0.004  | 0.0082 | 0      |
| Th2 cells   | 0.0836 | 0.0194 | 0.0096 | 0      | 0.0709   | 0.0194 | 0.0281 | 0.0272 |
| Tregs       | 0      | 0      | 0      | 0.0093 | 0        | 0.0033 | 0      | 0.001  |
| aDC         | 0.0404 | 0.2182 | 0.1479 | 0.2178 | 0.1085   | 0.2046 | 0.197  | 0.2007 |
| cDC         | 0      | 0.0032 | 0.0095 | 0.0011 | 0.0108   | 0.0458 | 0.055  | 0.0114 |
| iDC         | 0.1732 | 0.2147 | 0      | 0.0018 | 0        | 0.1858 | 0      | 0.0855 |
| ly Endothel | 0      | 0.0285 | 0.0483 | 0.0105 | 0.0059   | 0.0082 | 0.0921 | 0.0319 |
| mv Endoth   | 0      | 0.0295 | 0.031  | 0.0027 | 2.00E-04 | 0.0065 | 0.0778 | 0.0363 |
| naive B-ce  | 0      | 0      | 0      | 0      | 0        | 0      | 0      | 0      |
| pDC         | 0.0506 | 0.0194 | 0      | 0.0151 | 0.0345   | 0      | 0      | 0.0074 |
| pro B-cells | 0      | 0      | 0      | 0      | 1.00E-04 | 0      | 0      | 0      |
| ImmuneSc    | 0      | 0.1077 | 0.0117 | 0.041  | 0.0213   | 0.0287 | 0.0303 | 0.0296 |
| StromaSco   | 0.0138 | 0.0756 | 0.1157 | 0.0832 | 0.0061   | 0.1008 | 0.1518 | 0.1463 |
| Microenvir  | 0.0138 | 0.1833 | 0.1274 | 0.1242 | 0.0275   | 0.1295 | 0.1821 | 0.1758 |

|           |           |           |           |           |           |           |           |           |
|-----------|-----------|-----------|-----------|-----------|-----------|-----------|-----------|-----------|
| TARGET.4C |
| 0         | 0         | 8.00E-04  | 0         | 0         | 0         | 0         | 0         | 0         |
| 0         | 0         | 0         | 0         | 0.0344    | 0         | 0         | 0         | 0         |
| 0.0199    | 0         | 0         | 0         | 0         | 0.0223    | 0         | 0         | 0.0212    |
| 0.2117    | 0.0636    | 0         | 0.0909    | 0.0997    | 0.0171    | 0.093     | 0         | 0.1566    |
| 0         | 0         | 0         | 0         | 0         | 0         | 0         | 0         | 0         |
| 0.0341    | 0.0078    | 0         | 0         | 0.0023    | 0         | 0         | 0         | 0.0215    |
| 0         | 0.0558    | 0         | 0.0729    | 0         | 0.0263    | 0.0037    | 0         | 0         |
| 0         | 0         | 0         | 0         | 0         | 0.0059    | 0         | 0         | 0         |
| 0         | 0         | 0         | 0         | 0         | 0         | 0         | 0         | 0         |
| 0         | 0         | 0         | 0         | 0         | 7.00E-04  | 0         | 0         | 0         |
| 0         | 0         | 0         | 0         | 0         | 0.0124    | 0         | 0         | 0         |
| 0         | 0         | 0         | 0         | 0         | 0         | 0         | 0         | 0         |
| 0         | 0         | 0         | 0         | 0         | 0.0126    | 0         | 0         | 0         |
| 0.0172    | 0         | 0.0279    | 0         | 0.0046    | 0.0227    | 0         | 0.0398    | 0.0259    |
| 0         | 0         | 0.0037    | 0         | 0.0015    | 0         | 0.0013    | 0.0222    | 0         |
| 0         | 0.0277    | 0.1393    | 0.0118    | 0.0017    | 0         | 0.0781    | 0.1371    | 0         |
| 0.0059    | 6.00E-04  | 0         | 0         | 0.005     | 0.0085    | 0         | 0.0025    | 0.0118    |
| 0         | 0.0026    | 0         | 0.0042    | 0         | 0.0011    | 0         | 0         | 0         |
| 0.0287    | 0.1446    | 0.0479    | 0.252     | 0         | 0.1305    | 0.0594    | 0         | 0.0334    |
| 0         | 0.0038    | 0         | 0.0069    | 0         | 0         | 0         | 0         | 0         |
| 0         | 0.0126    | 0.0084    | 0.01      | 0.0034    | 0.0043    | 0.0029    | 0.0087    | 0.0172    |
| 0         | 0         | 0         | 0         | 0         | 0         | 0         | 0         | 0         |
| 0         | 0.1095    | 0.1967    | 0.0905    | 0.0776    | 0.0477    | 0.1594    | 0.2175    | 0.0971    |
| 0         | 0         | 0         | 0         | 0         | 0.0082    | 0         | 0.0486    | 0         |
| 0.0123    | 0.1341    | 0.1933    | 0.275     | 0.0305    | 0.1334    | 0.1213    | 0.1396    | 0.0179    |
| 0         | 0         | 0         | 0.0046    | 0         | 0         | 0.0012    | 0         | 0         |
| 0         | 0         | 0         | 0         | 0         | 0         | 0         | 0         | 0         |
| 0         | 0.026     | 0.0196    | 0.0515    | 0.0269    | 0.0055    | 0.0382    | 0.0099    | 0.0071    |
| 0         | 0         | 0         | 0         | 0         | 0         | 0         | 0         | 0         |
| 0.1296    | 0.2834    | 0.1421    | 0         | 0.0835    | 0.0705    | 0.2412    | 0.1038    | 0.3288    |
| 0.0118    | 0.0581    | 0         | 0.0772    | 0.031     | 0.0583    | 0.0344    | 0         | 0.0446    |
| 0.0107    | 0.0514    | 0         | 0.0612    | 0.0375    | 0.0473    | 0.021     | 0.0045    | 0.0264    |
| 0.0147    | 0.0496    | 0         | 0.0485    | 0.0028    | 0.0237    | 0.0382    | 0.0071    | 0.0239    |
| 0         | 0.0059    | 0         | 0.0032    | 6.00E-04  | 0.0021    | 8.00E-04  | 0         | 0.0165    |
| 0         | 9.00E-04  | 0.001     | 0         | 0         | 9.00E-04  | 0         | 0         | 0         |
| 0.0124    | 0.0142    | 0.0137    | 0.0059    | 0.0126    | 0.0058    | 0.0163    | 0.0257    | 0.008     |
| 0         | 0         | 0         | 0         | 0         | 0.0023    | 0         | 0         | 0         |
| 0         | 0         | 0         | 0.0012    | 0.0056    | 0         | 0         | 0         | 0         |
| 0         | 0.0408    | 0         | 0.0361    | 0.0056    | 0.0311    | 8.00E-04  | 0         | 0.0166    |
| 0.0323    | 0.0087    | 0.1579    | 0.0373    | 0.021     | 0.0155    | 0.0227    | 0.0091    | 0.0249    |
| 0         | 0         | 0         | 0         | 0         | 0         | 0         | 0         | 0         |
| 0.0549    | 0.0521    | 0.1653    | 0.1309    | 0.0945    | 0.0374    | 0.0757    | 0.1378    | 0.0916    |
| 0.004     | 2.00E-04  | 0.0038    | 9.00E-04  | 0.0053    | 2.00E-04  | 0         | 0.0074    | 0.0021    |
| 0         | 0         | 0         | 0.0021    | 0         | 0         | 8.00E-04  | 0         | 0         |
| 0.004     | 0         | 0.0221    | 0         | 0.0362    | 0.0572    | 0.0244    | 0         | 0.028     |
| 0         | 0         | 0         | 0.0498    | 0         | 0         | 0.0208    | 0         | 0.0775    |
| 0.025     | 0         | 0.0045    | 0         | 0         | 0.0203    | 0.0024    | 0.0314    | 0.0101    |
| 0         | 0         | 0         | 0         | 0         | 0         | 0         | 0         | 0         |
| 0         | 0         | 0         | 0.0478    | 0         | 0.0066    | 0         | 0         | 0         |
| 0         | 0         | 0         | 0         | 0         | 0         | 0         | 0.0024    | 0         |
| 0.0069    | 0.0021    | 0.1707    | 0.0141    | 0         | 0.0029    | 0.0051    | 0         | 0         |

|        |        |        |          |        |        |        |        |          |
|--------|--------|--------|----------|--------|--------|--------|--------|----------|
| 0.1586 | 0      | 0.0999 | 0.1024   | 0.0789 | 0.1198 | 0.0345 | 0.148  | 0        |
| 0      | 0      | 0      | 0        | 0.0027 | 0.0103 | 0      | 0      | 0        |
| 0      | 0.0188 | 0.0127 | 0.0019   | 0.0155 | 0      | 0.0115 | 0      | 0.0315   |
| 0      | 0      | 0.0249 | 0.0768   | 0.0148 | 0.0451 | 0.0611 | 0.0034 | 0        |
| 0      | 0      | 0      | 0        | 0      | 0.0044 | 0      | 0.0165 | 0.0065   |
| 0.1007 | 0.2866 | 0.0592 | 0.3      | 0.0864 | 0.2653 | 0.1044 | 0.1366 | 0.1899   |
| 0      | 0.0079 | 0      | 0.026    | 0      | 0.0049 | 0      | 0.0141 | 0.0054   |
| 0      | 0.0851 | 0      | 0.0583   | 0      | 0.0074 | 0      | 0      | 0        |
| 0.0116 | 0.1051 | 0.0262 | 0.1678   | 0      | 0.0614 | 0.0268 | 0      | 0.0291   |
| 0.0038 | 0.0931 | 0.02   | 0.1421   | 0      | 0.0614 | 0.0253 | 0      | 0.0215   |
| 0.0018 | 0      | 0      | 0        | 0      | 0.0032 | 0      | 0      | 0        |
| 0.0017 | 0.0126 | 0.0146 | 0.0036   | 0      | 0.0142 | 0.0242 | 0      | 5.00E-04 |
| 0      | 0      | 0      | 0        | 0      | 0      | 0      | 0      | 0        |
| 0.0211 | 0.0741 | 0      | 0.0865   | 0.0248 | 0.0771 | 0.0245 | 0      | 0.0659   |
| 0.0144 | 0.127  | 0.1227 | 1.71E-01 | 0.0388 | 0.0891 | 0.1094 | 0.1088 | 0.0652   |
| 0.0355 | 0.2012 | 0.1227 | 0.2577   | 0.0636 | 0.1662 | 0.1339 | 0.1088 | 0.1312   |

| TARGET.4C |
|-----------|-----------|-----------|-----------|-----------|-----------|-----------|-----------|-----------|
| 0         | 0         | 0         | 0         | 0         | 0         | 0         | 0.0013    | 0         |
| 0         | 0         | 0         | 0         | 0         | 0         | 0         | 0         | 0         |
| 0.0064    | 0         | 0         | 0         | 0         | 0         | 0         | 0         | 0         |
| 0         | 0.317     | 0         | 0         | 0.0274    | 0.0433    | 0.0863    | 0.3387    | 0.1336    |
| 0         | 0         | 0         | 0         | 0         | 0         | 0         | 0         | 0         |
| 0         | 0.001     | 0.0016    | 0         | 0.0177    | 0         | 0         | 0         | 0.0082    |
| 0.0122    | 0.0282    | 3.00E-04  | 0.0088    | 0         | 0.0296    | 0.0583    | 0.0155    | 0         |
| 0         | 0         | 0         | 0.0072    | 0         | 0         | 0         | 0         | 0.0084    |
| 0.0079    | 0         | 0         | 0         | 0         | 0         | 0         | 0         | 0         |
| 1.00E-04  | 0         | 0         | 0         | 0         | 0         | 0.0105    | 0         | 0         |
| 0.0202    | 0         | 0         | 0         | 0         | 0         | 0.082     | 0         | 0         |
| 0         | 0         | 0         | 0         | 0         | 0         | 0         | 0         | 0         |
| 0         | 0         | 0         | 0.0042    | 0.0085    | 0.0063    | 0.0176    | 0         | 0         |
| 0.0065    | 0         | 0.0263    | 0.0307    | 0.0194    | 0.0143    | 0.0141    | 0         | 7.00E-04  |
| 0.006     | 0         | 0.0056    | 0         | 0.0105    | 0         | 0.002     | 0         | 0         |
| 0         | 0         | 0         | 0.0051    | 0.0134    | 0         | 0.0607    | 0         | 0         |
| 0.00E+00  | 0         | 0         | 0.0021    | 0         | 0.0124    | 0.0144    | 0.0309    | 0.01      |
| 0         | 0         | 0         | 0         | 0         | 0         | 2.00E-04  | 0         | 0         |
| 0.0212    | 0.0644    | 0.1956    | 0.0171    | 0.116     | 0.0799    | 0.1309    | 0.0147    | 0.0554    |
| 0         | 0         | 0         | 0         | 0         | 0         | 0         | 0         | 0         |
| 0.0152    | 7.00E-04  | 0.0086    | 0.0271    | 0.0056    | 0.0145    | 0.0074    | 0         | 0.0012    |
| 0         | 0         | 0         | 0         | 0         | 0         | 0         | 0         | 0         |
| 0         | 0         | 0         | 0.1416    | 0.052     | 0.0769    | 0.0828    | 0.0262    | 0.1254    |
| 0.0094    | 0         | 0.0184    | 0         | 0.004     | 0         | 0         | 0         | 0         |
| 0.1312    | 0         | 0.2119    | 0.1647    | 0.2699    | 0.0356    | 0.256     | 0.0083    | 0.0738    |
| 0         | 0.0029    | 0         | 0         | 0.0014    | 0         | 0         | 0         | 0         |
| 0         | 0         | 0         | 0         | 0         | 0         | 0         | 0         | 0         |
| 0         | 0.033     | 0.0213    | 0.0274    | 0.0143    | 0.0502    | 0.0288    | 0.0671    | 0.0016    |
| 0         | 0         | 0         | 0         | 0         | 0         | 0         | 0         | 0         |
| 0.4682    | 3.67E-01  | 0.3369    | 0.3946    | 0.1639    | 0.267     | 0.4162    | 0.1382    | 0.0418    |
| 0.0437    | 0.0377    | 0.0169    | 0         | 0.0372    | 0.0702    | 0.0699    | 0.0437    | 6.00E-04  |
| 0.0249    | 0.0217    | 0.0228    | 0         | 0.0253    | 0.0391    | 0.0632    | 0.0459    | 0.0109    |
| 0.0034    | 0.0097    | 0.0126    | 0         | 0.0408    | 0.0144    | 0.0235    | 0.0193    | 0.004     |
| 0.0072    | 0.0036    | 0         | 0         | 0         | 0.0013    | 0         | 0.0023    | 0.0032    |
| 0.0037    | 0         | 0.0018    | 0.0043    | 0.001     | 0         | 0         | 0         | 0         |
| 0.0114    | 0.0119    | 0.0201    | 0.008     | 0.0115    | 0.0158    | 0.0052    | 0.0064    | 0.005     |
| 0         | 0.0076    | 0         | 0         | 0         | 0         | 0         | 0.0047    | 0         |
| 0         | 0         | 0         | 0         | 0         | 0         | 0         | 0         | 0         |
| 0.0091    | 0         | 0         | 0         | 0.0238    | 0.0314    | 0.0241    | 0         | 0         |
| 0.0175    | 0.0221    | 0.0371    | 0.025     | 0.0189    | 0.0202    | 0.307     | 0.0184    | 0.012     |
| 0         | 0         | 0         | 0         | 0         | 0         | 0         | 0         | 0         |
| 0.0495    | 0.0572    | 0.1191    | 0.0295    | 5.00E-04  | 0.0782    | 0.0422    | 0.0742    | 0.0072    |
| 0.0013    | 0         | 0.0061    | 0.0043    | 0.0014    | 1.00E-04  | 0.0062    | 0.0024    | 0.0015    |
| 0         | 0         | 0         | 0         | 1.00E-04  | 0         | 0         | 0         | 0         |
| 0         | 0         | 0.0219    | 0.0041    | 0         | 0         | 0         | 0.0088    | 0.0731    |
| 0         | 0.0172    | 0         | 0         | 0         | 0         | 0         | 0         | 0         |
| 0.0604    | 0.0127    | 0.0084    | 0.0188    | 0         | 0.0048    | 0         | 0.0014    | 0.0086    |
| 0         | 0         | 0         | 0         | 0         | 0         | 0         | 0         | 0         |
| 0         | 0         | 0         | 0         | 0         | 0         | 0         | 0         | 0.019     |
| 0         | 0         | 0         | 7.00E-04  | 0         | 0         | 0         | 0         | 0         |
| 0         | 0         | 0         | 0         | 0.0185    | 0.0047    | 0.2073    | 0.0047    | 0.0013    |

|          |        |        |        |          |        |        |        |        |
|----------|--------|--------|--------|----------|--------|--------|--------|--------|
| 0.1436   | 0      | 0      | 0.0906 | 0.1252   | 0.0424 | 0      | 0.1141 | 0.1391 |
| 0.004    | 0      | 0      | 0.0013 | 1.00E-04 | 0      | 0      | 0      | 0      |
| 0        | 0.0323 | 0      | 0.0146 | 0        | 0.0116 | 0.0168 | 0.0785 | 0      |
| 0        | 0.0055 | 0.0358 | 0.0308 | 0.0128   | 0.0373 | 0.0739 | 0.0406 | 0.1298 |
| 0.0156   | 0      | 0.0084 | 0      | 0        | 0      | 0      | 0      | 0      |
| 0.1093   | 0.0454 | 0.1577 | 0.0232 | 0.1881   | 0.1279 | 0.3142 | 0.1646 | 0.0559 |
| 0.0733   | 0      | 0.0158 | 0.0017 | 0.0035   | 0.0095 | 0.0088 | 0      | 0      |
| 0        | 0.0505 | 0      | 0      | 0.0071   | 0.025  | 0.0985 | 0.0209 | 0.0215 |
| 0.0088   | 0.0382 | 0.0903 | 0.009  | 0.0645   | 0.0483 | 0.065  | 0.0076 | 0.0251 |
| 0        | 0.0487 | 0.0906 | 0.004  | 0.0504   | 0.0449 | 0.0903 | 0.0161 | 0.0263 |
| 0        | 0.0064 | 0      | 0      | 0        | 0      | 0      | 0      | 0      |
| 0        | 0.0012 | 0.0046 | 0      | 0        | 0.0363 | 0      | 0      | 0.0032 |
| 0.00E+00 | 0.0067 | 0      | 0      | 0        | 0      | 0      | 0.013  | 0      |
| 0.0443   | 0.0275 | 0.0113 | 0      | 0.0407   | 0.0686 | 0.0698 | 0.0307 | 0.0025 |
| 0.0106   | 0.0322 | 0.0978 | 0.0794 | 0.084    | 0.0784 | 0.1068 | 0.0211 | 0.0904 |
| 0.0549   | 0.0597 | 0.1091 | 0.0794 | 0.1247   | 0.147  | 0.1766 | 0.0518 | 0.0929 |

| TARGET.4C |
|-----------|-----------|-----------|-----------|-----------|-----------|-----------|-----------|-----------|
| 0         | 0         | 0         | 0         | 0         | 0         | 0         | 0         | 0         |
| 0         | 0         | 0         | 0         | 0         | 0         | 0         | 0         | 0         |
| 0         | 4.00E-04  | 0         | 0         | 0         | 0         | 0         | 0.0081    | 0         |
| 0.1259    | 0.0716    | 0.0029    | 0.0101    | 0.0296    | 0.047     | 0.0665    | 0.1121    | 3.00E-04  |
| 0         | 0         | 0         | 0         | 0         | 0         | 0         | 0         | 0         |
| 0.0161    | 0         | 0         | 0         | 0         | 0         | 0         | 4.00E-04  | 0         |
| 0.0364    | 0.0444    | 0.1074    | 0         | 0         | 0.0273    | 0.0316    | 0.0209    | 0.0239    |
| 0         | 0         | 0         | 0.0022    | 0         | 0         | 0         | 0         | 0.0018    |
| 0         | 0         | 0         | 0         | 0         | 0         | 0         | 0         | 0         |
| 0         | 0         | 0         | 0         | 0         | 0         | 0         | 0         | 0         |
| 0         | 0         | 9.00E-04  | 0         | 9.00E-04  | 0         | 0         | 0         | 0         |
| 0         | 0         | 0.0091    | 0         | 0         | 0         | 0         | 0         | 0         |
| 0.0011    | 0         | 0.0034    | 0.0035    | 0.0052    | 0         | 0         | 0.0039    | 0.0112    |
| 0.0087    | 0         | 0.0129    | 0.0153    | 0.0146    | 0         | 0.0093    | 0.0146    | 0.0119    |
| 0.0096    | 0.0025    | 2.00E-04  | 0         | 0.0081    | 0.0032    | 0         | 0         | 0         |
| 0.0054    | 0         | 0         | 0         | 0.0398    | 0.0367    | 0         | 0         | 0         |
| 0.0012    | 0.001     | 0.0027    | 0         | 0         | 0.0025    | 0         | 0.0041    | 7.00E-04  |
| 0.0072    | 0         | 0         | 0         | 0         | 0         | 0         | 0         | 0         |
| 0.1518    | 0.0214    | 0.1378    | 0.0736    | 0.0237    | 0.0746    | 0.0447    | 0.0119    | 0.1495    |
| 0         | 0         | 0         | 0.0046    | 0         | 0         | 0         | 0         | 0.0039    |
| 0.0078    | 0.0194    | 0.0045    | 0         | 0.0011    | 0.0039    | 0.0099    | 0.0025    | 0.0166    |
| 0         | 0         | 0         | 0         | 0         | 0         | 0         | 0         | 0         |
| 0.1513    | 0         | 0.0857    | 0.1849    | 0.2139    | 0.0932    | 0.0659    | 0         | 0.0588    |
| 0         | 0         | 0         | 0         | 0         | 0.06      | 0         | 0         | 6.00E-04  |
| 0.2381    | 0         | 0.0914    | 0.1161    | 0.1955    | 0.1672    | 0.0334    | 0         | 0.199     |
| 0.0036    | 0         | 0         | 0         | 0         | 4.00E-04  | 2.00E-04  | 0         | 0.0014    |
| 0         | 0         | 0         | 0         | 0         | 0         | 0         | 0         | 0         |
| 0.0636    | 0.0388    | 0.0574    | 0.0134    | 0.0223    | 0.0436    | 0.0281    | 0.1251    | 0.0324    |
| 0         | 0         | 0         | 0         | 0         | 0         | 0         | 0         | 0         |
| 0.1597    | 0.5325    | 0.2353    | 0.4129    | 0.1478    | 0.2723    | 0.2572    | 0.583     | 0.0956    |
| 0.0407    | 0.046     | 0.0232    | 0         | 0.0198    | 0.0498    | 0.0422    | 0.001     | 0.0447    |
| 0.0368    | 0.0526    | 0.0442    | 0         | 0.0196    | 0.0412    | 0.0287    | 0.008     | 0.0389    |
| 0.0235    | 0.0259    | 0.0162    | 0.0041    | 0.0053    | 0.0298    | 0.0074    | 0.0078    | 0.0099    |
| 0.0019    | 0.0012    | 0         | 0         | 0.0012    | 0         | 0.0031    | 3.00E-04  | 0.0025    |
| 0         | 0         | 5.00E-04  | 0.0022    | 0         | 0         | 0         | 0         | 0.0041    |
| 0.0035    | 0.011     | 0.0106    | 0.0057    | 0.0141    | 0.0087    | 0.0156    | 0.007     | 0.0087    |
| 0         | 0.0163    | 0         | 0         | 0         | 0         | 0         | 0.005     | 0         |
| 0.0491    | 0         | 0         | 0         | 0         | 0         | 0         | 0         | 0.005     |
| 0.0526    | 0.0342    | 0.0177    | 0         | 0         | 0.0313    | 0         | 0         | 0.0258    |
| 0.0106    | 0         | 0.0126    | 0.0057    | 0.0114    | 0.0097    | 0.0183    | 0.0489    | 0.0232    |
| 0         | 0         | 0         | 0         | 0         | 0         | 0         | 0         | 0         |
| 0.0518    | 0.1128    | 0.1053    | 0.0115    | 0.0326    | 0.1735    | 0.1016    | 0.0775    | 0.077     |
| 0.0027    | 4.00E-04  | 0         | 0.0011    | 0.0018    | 0.0021    | 0         | 0.0032    | 0.0026    |
| 8.00E-04  | 0         | 0         | 6.00E-04  | 0         | 0.0026    | 0         | 0         | 6.00E-04  |
| 0.0274    | 0         | 0.0829    | 0         | 0.0669    | 0.0439    | 0.0442    | 0.0025    | 0         |
| 0.0333    | 0.0195    | 0.0336    | 0.0242    | 0         | 0.012     | 0.0023    | 0         | 0.0089    |
| 0         | 0.006     | 0.0106    | 0.0039    | 0.0041    | 0.0196    | 0.006     | 0.0065    | 0.0171    |
| 0         | 0         | 0         | 0         | 0         | 0         | 0         | 0         | 0         |
| 0         | 0         | 0         | 0         | 0         | 0         | 0         | 0         | 0.0033    |
| 0         | 0         | 0         | 0         | 0         | 0         | 0         | 0         | 0         |
| 0.0014    | 0         | 0.0016    | 0         | 0         | 0         | 9.00E-04  | 0         | 0.0134    |

|        |        |        |        |        |        |        |        |          |
|--------|--------|--------|--------|--------|--------|--------|--------|----------|
| 0.0306 | 0      | 0      | 0.2667 | 0.2052 | 0.0103 | 0.0616 | 0      | 0.0333   |
| 0      | 0      | 0      | 0      | 0      | 0      | 0      | 0      | 0        |
| 0.0574 | 0.0646 | 0.0616 | 0      | 0      | 0.0397 | 0.0333 | 0.0877 | 0.0134   |
| 0.0055 | 0.0264 | 0.0511 | 0.138  | 0.0847 | 0      | 0.0159 | 0.1147 | 0.0072   |
| 0      | 0      | 0      | 0      | 0      | 0      | 0      | 0      | 0.0082   |
| 0.1767 | 0.1787 | 0.195  | 0.0994 | 0.1551 | 0.1949 | 0.0442 | 0.1025 | 0.1441   |
| 0.0315 | 0      | 0.0075 | 0.0081 | 0.0082 | 0      | 0      | 0      | 1.00E-04 |
| 0.3365 | 0      | 0      | 0      | 0      | 0      | 0      | 0      | 0        |
| 0.0819 | 0.013  | 0.0977 | 0.0448 | 0.0091 | 0.0318 | 0.0219 | 0.0107 | 0.0824   |
| 0.1265 | 0.0283 | 0.0948 | 0.0301 | 0.013  | 0.0459 | 0.0317 | 0.0143 | 0.0681   |
| 0      | 0      | 0      | 0      | 0      | 0      | 0      | 0.0015 | 0        |
| 0      | 0.0019 | 0      | 0      | 0      | 0      | 0.0094 | 0.0531 | 0        |
| 0      | 0      | 0      | 0      | 0      | 0      | 0      | 0.0089 | 0        |
| 0.0688 | 0.0545 | 0.0273 | 0.0035 | 0.014  | 0.0558 | 0.0302 | 0.0063 | 0.0517   |
| 0.1516 | 0.0107 | 0.1118 | 0.1292 | 0.1188 | 0.0839 | 0.0553 | 0.006  | 0.1042   |
| 0.2204 | 0.0652 | 0.139  | 0.1327 | 0.1328 | 0.1397 | 0.0855 | 0.0122 | 0.1558   |



| TARGET.4C |
|-----------|-----------|-----------|-----------|-----------|-----------|-----------|-----------|-----------|
| 0         | 0         | 0         | 0.0012    | 0         | 0         | 0         | 0         | 8.00E-04  |
| 0         | 0         | 0         | 0         | 0         | 0         | 0         | 0         | 0.0059    |
| 0         | 0         | 0         | 0         | 0         | 0         | 0         | 0         | 0.0061    |
| 0.0013    | 0.0315    | 0.0095    | 0         | 0         | 0         | 0         | 0.007     | 0.153     |
| 0         | 0         | 0         | 0         | 0         | 0         | 0         | 0         | 0         |
| 0         | 0.0067    | 0         | 0         | 0         | 0.029     | 0.0033    | 0         | 0.0283    |
| 0         | 0.0253    | 0.0218    | 0.039     | 0         | 0.0208    | 1.00E-04  | 0         | 0.0712    |
| 0         | 0         | 0         | 0         | 0         | 0         | 0         | 0         | 0         |
| 0         | 0         | 0         | 0         | 0         | 0         | 0.0026    | 0         | 0         |
| 0         | 0         | 0         | 0         | 0         | 0.0041    | 0         | 0.0095    | 0         |
| 0         | 0         | 0         | 0.0013    | 0         | 9.00E-04  | 0         | 0         | 0         |
| 0         | 0         | 0         | 0         | 0         | 0         | 0         | 0         | 0         |
| 0.0263    | 0.0065    | 0         | 0.0208    | 0.0025    | 0.0105    | 0         | 0.0096    | 0         |
| 0.0361    | 0         | 0.0025    | 0.0138    | 0.0078    | 0.0034    | 0.0011    | 0.0113    | 0         |
| 0         | 0         | 0         | 0         | 4.00E-04  | 0.001     | 0.0033    | 0         | 0         |
| 0.0216    | 0.0263    | 0.0147    | 0.0792    | 0.0646    | 0.0387    | 0.1104    | 0.0229    | 0         |
| 0.0033    | 0         | 0         | 0         | 0.0026    | 0         | 0.0076    | 0.0062    | 0.0042    |
| 0.0075    | 0.0066    | 0         | 0         | 0         | 0         | 0         | 0         | 0         |
| 0         | 0.0621    | 0.0756    | 0.0485    | 0.0319    | 0.0611    | 0.0302    | 0.015     | 0.1191    |
| 0         | 0         | 0         | 0         | 0         | 0.0016    | 0         | 0         | 0         |
| 0.0051    | 0.013     | 0.0246    | 0.0217    | 0.0033    | 0.0085    | 0.0091    | 0.0021    | 0.0091    |
| 0         | 0         | 0         | 0         | 0         | 0         | 0         | 0         | 0         |
| 0.1312    | 0.1719    | 0.0955    | 0.1645    | 0.2565    | 0.133     | 0.0885    | 0.2382    | 0         |
| 0         | 0         | 0         | 0         | 0.0027    | 0         | 0         | 0         | 0         |
| 0.1207    | 0.149     | 1.44E-01  | 0.2167    | 0.2124    | 0.1092    | 0.1088    | 0.1433    | 0.0616    |
| 0         | 0.0016    | 0         | 0         | 0         | 0         | 0         | 0         | 0         |
| 0.0021    | 0         | 0         | 0         | 0         | 0         | 0         | 0         | 0         |
| 0.0534    | 0.0656    | 0.0346    | 0.0542    | 0.0106    | 0.0319    | 0.0219    | 0.0299    | 0.0226    |
| 0         | 0         | 0         | 0         | 0         | 0         | 0         | 0         | 0         |
| 0.1367    | 0.0435    | 0.3123    | 0.3012    | 0.23      | 0.3015    | 0.3514    | 0.1909    | 0.2011    |
| 0         | 0.0507    | 0.0439    | 0.0617    | 0.0133    | 0         | 0.0173    | 0.0253    | 0.0832    |
| 0         | 0.0265    | 0.0282    | 0.0412    | 0.0155    | 0.0023    | 0.0362    | 0.0253    | 0.0616    |
| 0.0017    | 0.0412    | 0.0279    | 0.0081    | 0.0061    | 0         | 0.0163    | 0.0298    | 0.0505    |
| 0         | 0         | 0         | 0         | 0         | 0.003     | 2.00E-04  | 0         | 0.0028    |
| 0         | 0.0011    | 0         | 2.00E-04  | 9.00E-04  | 0.001     | 0.0017    | 3.00E-04  | 0         |
| 0.0048    | 0.0085    | 0.0156    | 0.0066    | 0.0132    | 0.0049    | 0.0174    | 0.0064    | 0.002     |
| 0         | 0         | 0         | 0         | 0         | 0         | 0         | 0         | 0         |
| 0         | 0.0143    | 0         | 0         | 0         | 0         | 0         | 0         | 0.0078    |
| 0         | 0.0039    | 0.0065    | 0.0079    | 0.0109    | 0         | 0.0062    | 0.0075    | 0.0371    |
| 0.0094    | 0.224     | 0.0137    | 0.0424    | 0.0126    | 0.0039    | 0.0056    | 0.01      | 0.0013    |
| 0         | 0         | 0         | 0         | 0         | 0         | 0         | 0         | 0         |
| 0.0253    | 0.0996    | 0.1048    | 0.0154    | 0.044     | 0.0516    | 0.1764    | 0.0436    | 0.1166    |
| 0.0027    | 0         | 0.0014    | 0.0039    | 0.0032    | 0.0018    | 0.0011    | 1.00E-04  | 0.0021    |
| 7.00E-04  | 0         | 0.0014    | 0         | 0         | 0         | 0.0015    | 2.00E-04  | 0         |
| 0.0769    | 0.0763    | 0.0571    | 0         | 0         | 0.039     | 0.0288    | 0.0102    | 0.02      |
| 0         | 0.0288    | 0         | 0         | 0         | 0.0286    | 0.0085    | 0.1065    | 0.0065    |
| 0.0032    | 0.017     | 0         | 5.00E-04  | 0.0158    | 0.0209    | 0.0079    | 1.00E-04  | 5.00E-04  |
| 0         | 0         | 0         | 0         | 0         | 0         | 0         | 0         | 0         |
| 0         | 0         | 0         | 0         | 0         | 0         | 0         | 0         | 0         |
| 0         | 0         | 0         | 0         | 0         | 0         | 0.0014    | 0         | 0         |
| 0         | 0.2388    | 4.00E-04  | 6.00E-04  | 0         | 0         | 0         | 0         | 0         |

|        |        |        |        |        |        |        |        |        |
|--------|--------|--------|--------|--------|--------|--------|--------|--------|
| 0.1759 | 0      | 0.0522 | 0.1036 | 0.2423 | 0.0372 | 0      | 0.2535 | 0      |
| 0      | 0      | 0      | 0      | 0      | 0      | 0      | 0      | 0      |
| 0.0355 | 0.0589 | 0.0128 | 0      | 0      | 0.0263 | 0.0057 | 0      | 0.0271 |
| 0.1139 | 0      | 0.0241 | 0.0204 | 0.023  | 0      | 0      | 0.05   | 0      |
| 0      | 0      | 0      | 0      | 0      | 0      | 0      | 0      | 0      |
| 0.0619 | 0.1479 | 0.1291 | 0.1286 | 0.1209 | 0.0631 | 0.1401 | 0.193  | 0.2322 |
| 0.0343 | 0.0028 | 0      | 0.0288 | 0.0019 | 0.0062 | 0      | 0.0176 | 0.0013 |
| 0.1398 | 0.2154 | 0      | 0.0789 | 0      | 0      | 0      | 0      | 0.1434 |
| 0      | 0.0376 | 0.0444 | 0.0284 | 0.011  | 0.0385 | 0.0047 | 0.0066 | 0.0781 |
| 0      | 0.0439 | 0.0383 | 0.0252 | 0.0096 | 0.0455 | 0.0124 | 0.0087 | 0.0825 |
| 0      | 0      | 0      | 0      | 0      | 0      | 0      | 0      | 0      |
| 0.0189 | 0.0791 | 0      | 0.056  | 0      | 0      | 0      | 0.0079 | 0.0029 |
| 0      | 0      | 0      | 0      | 0      | 0      | 0      | 0      | 0      |
| 0.0055 | 0.0408 | 0.0345 | 0.0464 | 0.0161 | 0.0058 | 0.0168 | 0.0283 | 0.0861 |
| 0.0656 | 0.117  | 0.0856 | 0.1071 | 0.1442 | 0.097  | 0.0594 | 0.1266 | 0.06   |
| 0.0711 | 0.1578 | 0.1201 | 0.1535 | 0.1603 | 0.1028 | 0.0762 | 0.1549 | 0.1461 |

| TARGET.4C |
|-----------|-----------|-----------|-----------|-----------|-----------|-----------|-----------|-----------|
| 0         | 0         | 0         | 0         | 0         | 0         | 0         | 0.0059    | 0         |
| 0         | 0         | 0         | 0         | 0         | 0         | 0         | 0         | 0         |
| 0         | 0         | 0.004     | 0         | 0.0017    | 0.0097    | 0.0056    | 0         | 0         |
| 0.0087    | 0         | 0.1008    | 0.01      | 0.0215    | 0.275     | 0.1373    | 0.0936    | 0.0439    |
| 0         | 0         | 0         | 0         | 0         | 0         | 0         | 0         | 0         |
| 0         | 0         | 0         | 0         | 0.0023    | 0         | 0         | 0         | 0         |
| 0.0437    | 0.0074    | 0.0371    | 0.0567    | 0.0219    | 0         | 0.068     | 0.0446    | 0.0619    |
| 0         | 0         | 0         | 0.0052    | 0.0087    | 0.0085    | 3.00E-04  | 0         | 0         |
| 0         | 0         | 0         | 0         | 0         | 0         | 0         | 0         | 0         |
| 0         | 0         | 0         | 0         | 0.0085    | 0         | 0         | 0         | 0         |
| 0.0071    | 0.0039    | 0         | 0         | 0         | 0         | 0.0052    | 3.00E-04  | 0         |
| 0         | 0         | 0         | 0         | 0         | 0         | 0         | 0         | 0         |
| 0.0126    | 0.0185    | 0         | 0         | 0.0017    | 0         | 0.0021    | 0.0011    | 0         |
| 0.0306    | 0.0199    | 0.0097    | 0.0176    | 0.0517    | 0.046     | 0.0299    | 0.0048    | 0.0095    |
| 0.0037    | 0.0048    | 0         | 0         | 0         | 0         | 0         | 0.0066    | 0         |
| 0.0268    | 0.0436    | 0         | 0         | 0         | 0         | 0         | 0         | 0         |
| 0.0088    | 0.0018    | 0.0029    | 0.0158    | 0.0072    | 0.0298    | 0.0049    | 0         | 0.0055    |
| 0.0029    | 0         | 0         | 1.00E-04  | 0         | 0         | 0         | 0.0076    | 0         |
| 0.0962    | 0.062     | 0.0079    | 0.1158    | 0.0128    | 0.0645    | 0.0806    | 0.0972    | 0.1613    |
| 0         | 0         | 0         | 0.0139    | 0         | 0         | 0         | 0         | 0         |
| 0.0148    | 0.0064    | 0.0103    | 0.0132    | 0.007     | 0.0053    | 6.60E-03  | 0         | 0.0099    |
| 0         | 0         | 0         | 0         | 0         | 0         | 0         | 0         | 0         |
| 0.0592    | 0.0912    | 0         | 0.0756    | 0         | 0         | 0         | 0.067     | 0         |
| 0.0013    | 0         | 0         | 0         | 0         | 0         | 0         | 0         | 0         |
| 0.165     | 2.24E-01  | 0         | 0.1109    | 0.002     | 0.1833    | 0.0149    | 0.1258    | 0.0973    |
| 0         | 0         | 0.0015    | 0         | 0         | 5.00E-04  | 0         | 0         | 0         |
| 0         | 0         | 0         | 0         | 0         | 0         | 0         | 0         | 0         |
| 0.0614    | 0.0663    | 0.0729    | 0.0326    | 0.0668    | 0.0507    | 0.0512    | 0.0286    | 0.0524    |
| 0         | 0         | 0         | 0         | 0         | 0         | 0         | 0         | 0         |
| 0.1899    | 0.2635    | 0.1689    | 0.1397    | 0.0075    | 0.0729    | 0.4673    | 0         | 0.2973    |
| 0.1159    | 0.0796    | 0.0502    | 0.1172    | 0.0136    | 0         | 0.0177    | 0.0794    | 0.0452    |
| 0.0701    | 0.056     | 0.0533    | 0.0606    | 0.009     | 0.0043    | 0.0106    | 0.0667    | 0.0398    |
| 0.0509    | 0.0265    | 0.0126    | 0.0422    | 0         | 0.0108    | 0.0111    | 0.0661    | 0.0153    |
| 0.003     | 0         | 0.0048    | 0.0043    | 0.0049    | 0         | 0         | 0.009     | 0         |
| 0.0057    | 0.0019    | 0         | 0.0014    | 0.0015    | 0.0076    | 0         | 0.0023    | 0.0015    |
| 0.0131    | 0.0112    | 0.0059    | 0.0077    | 0.0054    | 0.0094    | 0.0204    | 0.0243    | 0.0194    |
| 0         | 0         | 0         | 0         | 0.005     | 0         | 0.005     | 0         | 0         |
| 0         | 0         | 0         | 0         | 0         | 0         | 0         | 3.00E-04  | 0         |
| 0.0444    | 0.0389    | 0.0303    | 0.054     | 0.004     | 0         | 0         | 0.0363    | 0.0292    |
| 0.0128    | 0.0142    | 0.0066    | 0.018     | 0.0319    | 0.0156    | 0.0406    | 0.023     | 0.0245    |
| 0         | 0         | 0         | 0         | 0         | 0         | 0         | 0         | 0         |
| 0.0343    | 0.018     | 0.0417    | 0.04      | 0.0265    | 0.0163    | 0.052     | 0.0938    | 0.0752    |
| 0         | 7.00E-04  | 0.0012    | 0.0019    | 0.0024    | 0.0216    | 7.00E-04  | 0         | 0.0019    |
| 0         | 0         | 0         | 0         | 0         | 0         | 0         | 0         | 0         |
| 0.0239    | 0.0328    | 0.0555    | 0.0042    | 0.0499    | 0         | 0         | 0.0459    | 0         |
| 0         | 0         | 7.00E-04  | 0         | 0         | 0         | 0         | 0         | 0         |
| 9.00E-04  | 0.004     | 0         | 0         | 0.0099    | 0.0037    | 8.00E-04  | 0         | 0.0125    |
| 0         | 0         | 0         | 0         | 0         | 0         | 0         | 0         | 0         |
| 0         | 0         | 0         | 0         | 0.0406    | 0         | 0         | 0         | 0         |
| 0         | 0         | 0         | 0         | 0         | 0         | 0         | 0         | 0         |
| 0         | 0         | 0.001     | 0         | 0.0082    | 0.0034    | 0.0026    | 0         | 0.0035    |

|        |        |        |        |        |        |        |        |        |
|--------|--------|--------|--------|--------|--------|--------|--------|--------|
| 0.1192 | 0.1642 | 0.0346 | 0.0679 | 0.2798 | 0      | 0      | 0.1928 | 0.0854 |
| 0      | 0      | 0      | 0      | 0      | 0      | 0      | 0      | 0      |
| 0.0212 | 0.005  | 0.0727 | 0      | 0.0059 | 0.0178 | 0.0288 | 0      | 0      |
| 0.0673 | 0.1127 | 0.0112 | 0      | 0.1286 | 0      | 0.0588 | 0.0358 | 0.0396 |
| 0      | 0      | 0.0018 | 0      | 0      | 0      | 0      | 0.0087 | 0      |
| 0.2802 | 0.2294 | 0.1486 | 0.2401 | 0.0582 | 0.0716 | 0.141  | 0.2131 | 0.231  |
| 0.0244 | 0.0437 | 0      | 0.0132 | 0.0015 | 0.0016 | 0      | 0.0399 | 0.0221 |
| 0.077  | 0.007  | 0      | 0.1118 | 0      | 0      | 0      | 0.1745 | 0      |
| 0.0593 | 0.0315 | 0      | 0.0552 | 0.0064 | 0.0344 | 0.0508 | 0.0398 | 0.0966 |
| 0.0514 | 0.0299 | 0.0075 | 0.0566 | 0.0021 | 0.0224 | 0.0486 | 0.0455 | 0.0798 |
| 0      | 0      | 0      | 0      | 0.001  | 0      | 0.0024 | 0      | 0      |
| 0.0043 | 0      | 0.0038 | 0.0141 | 0.0147 | 0.0486 | 0      | 0.0031 | 0.0035 |
| 0      | 0      | 0      | 0      | 0.0088 | 0      | 0      | 0      | 0      |
| 0.1108 | 0.079  | 0.0595 | 0.1263 | 0.0218 | 0.0065 | 0.0155 | 0.0882 | 0.0496 |
| 0.0777 | 0.0766 | 0.004  | 0.0957 | 0.0064 | 0.0322 | 0.0403 | 0.085  | 0.0806 |
| 0.1885 | 0.1556 | 0.0635 | 0.222  | 0.0282 | 0.0387 | 0.0558 | 0.1733 | 0.1302 |

| TARGET.4C |
|-----------|-----------|-----------|-----------|-----------|-----------|-----------|-----------|-----------|
| 0         | 0         | 0         | 0.0021    | 0         | 0         | 0         | 0         | 0         |
| 0         | 0         | 0         | 0         | 0         | 0         | 0         | 0         | 0         |
| 0         | 0         | 0.007     | 0         | 0         | 0         | 0         | 0.0167    | 0         |
| 0         | 0         | 0.0408    | 0.1611    | 0.0086    | 0         | 0.0045    | 0.0232    | 0.01      |
| 0         | 0         | 0         | 0         | 0         | 0         | 0         | 0         | 0         |
| 0         | 0         | 0         | 0         | 0         | 0         | 0         | 0         | 0         |
| 0         | 0.0664    | 0.0901    | 0         | 0.0091    | 0         | 0         | 0.0473    | 0         |
| 0         | 0.0146    | 0.0126    | 0         | 0.0145    | 0.0106    | 0         | 0.009     | 0         |
| 0         | 0         | 0         | 0         | 0         | 0         | 0         | 0         | 0         |
| 0         | 0         | 0         | 0         | 0         | 0         | 0         | 0         | 0         |
| 0         | 0.0248    | 0         | 0         | 0.0079    | 0.0019    | 0         | 0.0116    | 0.0017    |
| 0         | 0         | 0         | 0         | 0         | 0         | 0         | 0         | 0         |
| 0.0013    | 8.00E-04  | 0.0035    | 0         | 0.0013    | 0.001     | 0.0254    | 0.0035    | 0         |
| 0.0177    | 0.0157    | 0.0295    | 0.0191    | 0.0189    | 0.028     | 0.0309    | 0.0146    | 0.0065    |
| 0.0018    | 0.0158    | 0         | 0         | 0         | 0         | 0         | 0         | 1.00E-04  |
| 0         | 0         | 0         | 0.0665    | 0         | 0         | 0.0083    | 0.0647    | 0.1441    |
| 0.0076    | 0         | 0.0043    | 0.0174    | 0         | 0         | 0         | 0.0287    | 0         |
| 0         | 0.0034    | 0         | 0         | 0         | 0         | 0         | 0         | 0         |
| 0.0499    | 0.1329    | 0.0229    | 0.0311    | 0.0539    | 0.1061    | 0.0184    | 0.0469    | 0.0515    |
| 0         | 0         | 0         | 0         | 2.00E-04  | 0         | 0         | 0         | 0         |
| 0.0077    | 0.0079    | 0.0095    | 0.0057    | 0.0035    | 0.0108    | 0         | 3.00E-04  | 0.0049    |
| 0         | 0         | 0         | 0         | 0         | 0         | 6.00E-04  | 0         | 0         |
| 0.0592    | 0.0616    | 0.044     | 0.2365    | 0.1247    | 0.0684    | 0         | 0.2087    | 0.1522    |
| 0.0046    | 0.0359    | 0         | 0         | 0.0028    | 0         | 0         | 0.0102    | 0.0325    |
| 0.1718    | 0.1309    | 0.0051    | 0.0594    | 0.0429    | 0.1685    | 0.2578    | 0.0357    | 0.2502    |
| 0         | 0         | 0         | 5.00E-04  | 0         | 0         | 0         | 0         | 0         |
| 0         | 0         | 0         | 0         | 0         | 0         | 0         | 0         | 0         |
| 0.0168    | 0.0397    | 0.0238    | 0         | 0.0128    | 0.0499    | 0.0431    | 0.0209    | 0.0132    |
| 0         | 0         | 0         | 0         | 0         | 0         | 0         | 0         | 0         |
| 0.0939    | 0.1611    | 0.0697    | 0.1851    | 0.0402    | 0.0384    | 0         | 0.1222    | 0.3123    |
| 0.0119    | 0.0449    | 0.0496    | 0         | 0.0467    | 0.0683    | 0         | 0.1357    | 0.0221    |
| 0.0152    | 0.0329    | 0.0078    | 0.0029    | 0.0218    | 0.0406    | 0         | 0.0765    | 0.021     |
| 0.0076    | 0.0172    | 0.0183    | 0.0054    | 0.0055    | 0.0355    | 0         | 0.0485    | 0.0032    |
| 0         | 0         | 0.0103    | 2.00E-04  | 0.0041    | 0         | 0.0015    | 0.0112    | 0         |
| 0.0021    | 0.0028    | 5.00E-04  | 0         | 0         | 2.00E-04  | 0.0015    | 0.0012    | 5.00E-04  |
| 0.013     | 0.0126    | 0.0111    | 0.0148    | 0.015     | 0.017     | 0         | 0.0081    | 0.0089    |
| 0         | 0         | 0         | 0         | 0         | 0         | 0         | 0.0053    | 0         |
| 0         | 0         | 0         | 0         | 0         | 0         | 0         | 0         | 0         |
| 0         | 0.0267    | 0         | 0         | 0.006     | 0.0338    | 0         | 0.0788    | 0.0057    |
| 0.0404    | 0.0612    | 0.0215    | 0.0074    | 0.0245    | 0.028     | 0.4191    | 0.0055    | 0.0023    |
| 0         | 0         | 0         | 0         | 0         | 0         | 0         | 0         | 0         |
| 0.0307    | 0.0384    | 0.0515    | 0.0333    | 0.0671    | 0.0325    | 0.0351    | 0.0238    | 0.0204    |
| 0.0013    | 1.00E-04  | 0.0027    | 0.0048    | 8.00E-04  | 0.0012    | 0.0359    | 8.00E-04  | 0.0042    |
| 0         | 0         | 0         | 0         | 3.00E-04  | 0         | 0.0057    | 0         | 0.0013    |
| 0.0471    | 0.0523    | 0.0532    | 0         | 0.0662    | 0.0307    | 0         | 0         | 0         |
| 0         | 0         | 0         | 0         | 0         | 0         | 0         | 0.0424    | 0.0138    |
| 0.017     | 0.0074    | 0.0138    | 0         | 0.0176    | 0         | 0         | 0.0011    | 0         |
| 0         | 0         | 0         | 0         | 0         | 0         | 0         | 0         | 0         |
| 0         | 0         | 0.0186    | 0         | 0.0078    | 0         | 0         | 0         | 0         |
| 0         | 0         | 0         | 0         | 0         | 0         | 0         | 0         | 0         |
| 0.0093    | 0.0305    | 3.00E-04  | 0         | 6.00E-04  | 0.006     | 0.3439    | 0         | 0         |

|        |        |          |          |          |        |          |        |        |
|--------|--------|----------|----------|----------|--------|----------|--------|--------|
| 0.2161 | 0.1866 | 0.3019   | 0.0862   | 0.2503   | 0.241  | 0.2174   | 0.2923 | 0.1498 |
| 0      | 0      | 0.0166   | 0        | 0        | 0.0059 | 0        | 0      | 0      |
| 0      | 0      | 0        | 0        | 0        | 0      | 8.00E-04 | 0      | 0      |
| 0.1059 | 0.0815 | 0.0258   | 0.0158   | 0.0936   | 0.0585 | 0.0231   | 0.0708 | 0.0011 |
| 0.0165 | 0      | 0        | 0.0099   | 0        | 0      | 0        | 0      | 0      |
| 0.1226 | 0.1774 | 0        | 0.0793   | 0.031    | 0.1783 | 0        | 0.2802 | 0.1509 |
| 0.0096 | 0.0252 | 0        | 0.0024   | 0.0365   | 0      | 0        | 0.0356 | 0.018  |
| 0      | 0.1098 | 0        | 0        | 0.0035   | 0      | 0.0191   | 0      | 0      |
| 0.027  | 0.0715 | 0.0107   | 0.0171   | 0.0189   | 0.0414 | 0.0053   | 0.0164 | 0.0251 |
| 0.0167 | 0.0675 | 0.009    | 0.0045   | 0.0166   | 0.0421 | 0.0033   | 0.021  | 0.0216 |
| 0      | 0      | 2.00E-04 | 0        | 0        | 0      | 0        | 0      | 0      |
| 0      | 0      | 0.0131   | 0        | 5.00E-04 | 0.0122 | 0        | 0.0062 | 0      |
| 0      | 0      | 0.0047   | 0        | 0        | 0      | 0        | 0      | 0      |
| 0.0079 | 0.05   | 0.0446   | 1.00E-04 | 0.0382   | 0.0681 | 0.0048   | 0.1616 | 0.0194 |
| 0.0546 | 0.0972 | 0.0334   | 0.1348   | 0.0893   | 0.0872 | 0.0092   | 0.1278 | 0.1018 |
| 0.0625 | 0.1472 | 0.0781   | 0.135    | 0.1275   | 0.1553 | 0.014    | 0.2894 | 0.1212 |

| TARGET.4C |
|-----------|-----------|-----------|-----------|-----------|-----------|-----------|-----------|-----------|
| 0         | 0         | 0         | 0         | 0.0101    | 0         | 0         | 0         | 0         |
| 0         | 0         | 0         | 0         | 0         | 0         | 0         | 0         | 0         |
| 8.00E-04  | 0         | 0.0029    | 0.0284    | 0.0193    | 0         | 0         | 0         | 0         |
| 0.0278    | 0.0215    | 0.0478    | 0.1882    | 0.0055    | 0.0916    | 0         | 0.1943    | 0.0361    |
| 0         | 0         | 0         | 0         | 0         | 0         | 0         | 0         | 0         |
| 0         | 0         | 0         | 0         | 0         | 0         | 0         | 0.0115    | 0.0098    |
| 0.0817    | 0.038     | 0.0237    | 0.1398    | 0.0734    | 0         | 0         | 0.0243    | 0.0597    |
| 0.0019    | 0.0098    | 0.0246    | 0         | 2.00E-04  | 0.0019    | 0         | 0         | 0.0067    |
| 0         | 0         | 0         | 0         | 0         | 0         | 0         | 0         | 0         |
| 0         | 0         | 0         | 0.1231    | 0.1329    | 0         | 0         | 0         | 0         |
| 0.0039    | 0         | 0         | 0.1786    | 0.1639    | 0         | 0         | 0.0032    | 0         |
| 0         | 0         | 0         | 0.0838    | 0.0372    | 0         | 0         | 0         | 0         |
| 0         | 0.0144    | 0.0068    | 0.0423    | 0.0447    | 0.0156    | 0.0201    | 0.0276    | 0         |
| 0.0071    | 0.0122    | 0.0389    | 0.0101    | 0.0082    | 0.0349    | 0.0059    | 0.0038    | 0.018     |
| 0         | 0         | 0         | 0         | 0         | 0.0012    | 0.0054    | 0.0076    | 0         |
| 0         | 0         | 0.0459    | 0         | 0.0328    | 0.0047    | 0         | 0         | 0.0034    |
| 0.0124    | 0.0016    | 0.0073    | 0.0169    | 0.0317    | 0.0045    | 0         | 0.0306    | 0         |
| 0.0012    | 0.0012    | 0         | 9.00E-04  | 0.0209    | 0         | 0         | 0.0288    | 0         |
| 0.051     | 0.1296    | 0         | 0.0048    | 0.1567    | 0.011     | 0.1104    | 0.0535    | 0         |
| 0         | 0         | 0         | 0         | 0         | 0         | 0         | 0         | 0         |
| 0.0076    | 0.0112    | 7.00E-04  | 0.0089    | 0.0072    | 1.00E-04  | 0.0058    | 0.0025    | 0.0052    |
| 0         | 0         | 0         | 0         | 0         | 6.00E-04  | 0         | 0         | 0         |
| 0         | 0         | 0.1297    | 0.0103    | 0.1253    | 0.1259    | 0.2319    | 0         | 0.1054    |
| 0         | 0.0014    | 0         | 0         | 0.0136    | 0         | 0.0639    | 0         | 0         |
| 0.0619    | 0.0945    | 0.0136    | 0         | 0.2669    | 0.0434    | 0.3682    | 0.1354    | 0.0461    |
| 0         | 0         | 0         | 0         | 0         | 0         | 0         | 0         | 0         |
| 0         | 0         | 0         | 0         | 0         | 0         | 0         | 0         | 0         |
| 0.0425    | 0         | 0.0187    | 0.0423    | 0.0052    | 0.0328    | 0.0261    | 0.0618    | 0.0315    |
| 0         | 0         | 0         | 0         | 0         | 0         | 0         | 0         | 0         |
| 0.1608    | 0.3186    | 0         | 0.2217    | 0.0513    | 0.0175    | 0.1566    | 0.558     | 0.2207    |
| 0.0759    | 0.063     | 0.0036    | 0.0548    | 0.1412    | 0.0102    | 0.013     | 0.0255    | 0         |
| 0.0654    | 0.0608    | 0         | 0.0589    | 0.0946    | 0.0112    | 0.016     | 0.0191    | 0.0013    |
| 0.0398    | 0.0156    | 0         | 0.0269    | 0.057     | 0.0148    | 0.0252    | 0.0163    | 0         |
| 9.00E-04  | 0         | 0.0042    | 9.00E-04  | 0         | 6.00E-04  | 0         | 0         | 1.00E-04  |
| 1.00E-04  | 0.0047    | 0         | 0         | 0.0095    | 0         | 0.0067    | 0         | 0         |
| 0.0167    | 0.0102    | 0.0036    | 0.0089    | 0.0071    | 0.0013    | 0.0193    | 0.0024    | 0.0174    |
| 0         | 0         | 5.00E-04  | 0.0079    | 0.0032    | 0         | 0         | 0         | 0         |
| 0         | 0         | 0.0108    | 0         | 0         | 0         | 0         | 0         | 0         |
| 0.0249    | 0.0362    | 0         | 0.0186    | 0.0647    | 0.0028    | 0         | 0.0051    | 0         |
| 0.014     | 0.0222    | 0.0666    | 0.0262    | 0.2398    | 0.3467    | 0.0141    | 0.038     | 0.0093    |
| 0         | 0         | 0         | 0         | 0         | 0         | 0         | 0         | 0         |
| 0.0491    | 0.0152    | 0.0818    | 0.0894    | 0.083     | 0.0515    | 0.0311    | 0.0548    | 0.0147    |
| 6.00E-04  | 0.0033    | 0.0019    | 0.0012    | 0.0013    | 0.0013    | 0.0019    | 0         | 0.0049    |
| 0         | 0         | 0         | 0         | 0         | 3.00E-04  | 0         | 0         | 0         |
| 0.0194    | 0         | 0.0241    | 0         | 0         | 0.0316    | 0.0069    | 0         | 0.0431    |
| 0         | 0.0055    | 0         | 0         | 0         | 0         | 0         | 0         | 0         |
| 0.0132    | 0.0075    | 0.0067    | 0.0014    | 0.0096    | 0.0092    | 0.0054    | 0         | 0.0078    |
| 0         | 0         | 0         | 0         | 0         | 0.0175    | 0         | 0         | 0         |
| 0.0031    | 0         | 0         | 0         | 0         | 0.0213    | 0         | 0         | 0         |
| 0         | 0         | 0         | 0         | 0         | 0         | 0         | 0         | 0         |
| 0.0042    | 0.0027    | 0.0199    | 0         | 0.3877    | 0.2681    | 0.0059    | 0.0094    | 0         |

|        |        |        |        |          |        |        |        |          |
|--------|--------|--------|--------|----------|--------|--------|--------|----------|
| 0.1285 | 0.0897 | 0.1957 | 0.0476 | 0.0712   | 0.1845 | 0.0686 | 0.013  | 0.1914   |
| 0      | 0      | 0.0076 | 0      | 3.00E-04 | 0      | 0      | 0      | 0        |
| 0.0208 | 0      | 0      | 0.039  | 0.0027   | 0      | 0.0073 | 0.0677 | 0.0256   |
| 0.0614 | 0.0625 | 0.0493 | 0.1347 | 0.0459   | 0.0633 | 0.014  | 0.0064 | 0.0327   |
| 0      | 0.0124 | 0.0037 | 0      | 0        | 0      | 0      | 0      | 0        |
| 0.2764 | 0.2512 | 0.0191 | 0.3199 | 0.3796   | 0.1053 | 0.1066 | 0.3296 | 0.0208   |
| 0.0103 | 0.0212 | 0.0098 | 0      | 0.0897   | 0      | 0.0076 | 0.0164 | 0.003    |
| 0      | 0      | 0.0013 | 0.0084 | 0.2371   | 0.0434 | 0      | 0.5044 | 0        |
| 0.0241 | 0.0529 | 0      | 0.0027 | 0.0842   | 0.0057 | 0.0554 | 0.0373 | 0        |
| 0.0276 | 0.053  | 0      | 0.0064 | 0.076    | 0.0076 | 0.0605 | 0.0491 | 0        |
| 0      | 0      | 0.0022 | 0      | 0        | 0      | 0      | 0      | 0        |
| 0.0072 | 0.0476 | 0.0017 | 0.1288 | 0.1042   | 0      | 0      | 0      | 0        |
| 0      | 0      | 0      | 0      | 0        | 0.0092 | 0      | 0      | 0.0027   |
| 0.0691 | 0.0669 | 0.0071 | 0.1511 | 0.2527   | 0.0093 | 0.0087 | 0.0396 | 1.00E-04 |
| 0.0255 | 0.0648 | 0.0648 | 0.0076 | 0.1461   | 0.0685 | 0.1712 | 0.0268 | 0.0527   |
| 0.0946 | 0.1317 | 0.072  | 0.1587 | 0.3987   | 0.0777 | 0.1798 | 0.0663 | 0.0528   |



| TARGET.4C |
|-----------|-----------|-----------|-----------|-----------|-----------|-----------|-----------|-----------|
| 0         | 0         | 0         | 0.0028    | 0         | 0         | 0         | 0         | 0         |
| 0         | 0         | 0         | 0         | 0         | 0         | 0         | 0         | 0         |
| 0         | 0         | 0         | 0         | 0         | 0         | 0         | 0         | 0         |
| 0.183     | 0.0189    | 0.0105    | 0.0221    | 0.2477    | 0.0606    | 0.0669    | 0.0557    | 0.0434    |
| 0         | 0         | 0         | 0         | 0         | 0         | 0         | 0         | 0         |
| 0         | 0.0025    | 0.0185    | 0         | 0.0143    | 0         | 0         | 0         | 0.0027    |
| 0.03      | 0.0298    | 0.044     | 3.00E-04  | 0.0385    | 0.0143    | 0.0248    | 0.1241    | 0         |
| 0.0083    | 0         | 0         | 0         | 0         | 0         | 0         | 0.0021    | 0         |
| 0         | 0         | 0         | 0         | 0         | 0         | 0         | 0         | 0         |
| 0         | 0         | 0         | 0         | 0         | 0         | 0         | 0         | 0         |
| 0         | 0         | 0         | 0         | 0         | 0         | 0         | 0.0123    | 0         |
| 0         | 0         | 0         | 0         | 0         | 0         | 0         | 0         | 0         |
| 0         | 0         | 0.0127    | 0         | 0         | 0         | 0         | 0.0024    | 0         |
| 0.0209    | 0.0129    | 0.0046    | 0.009     | 0         | 0.0334    | 0.0054    | 0.0148    | 0.021     |
| 0         | 0         | 0.0026    | 0         | 0         | 0         | 0         | 0.0033    | 0.006     |
| 0         | 0         | 0         | 0.035     | 0         | 0.0266    | 0         | 0         | 0.1736    |
| 7.00E-04  | 0         | 0.0062    | 0         | 0.0096    | 0         | 0.0076    | 0.0049    | 0         |
| 0         | 9.00E-04  | 0         | 0         | 0         | 0         | 0         | 0.0011    | 0         |
| 0.1324    | 0.0474    | 0.0843    | 0.018     | 0.05      | 0.0177    | 0.2075    | 0.0802    | 0.0034    |
| 0         | 0         | 0         | 0         | 0         | 0         | 0.0028    | 0         | 0.0019    |
| 0.0029    | 0.0102    | 0.0069    | 0.0152    | 0.0058    | 0.0029    | 0.0056    | 0.0107    | 0.0039    |
| 0         | 0         | 0         | 0         | 0         | 0         | 0         | 0         | 0         |
| 0.0472    | 0.0587    | 0.0246    | 0.181     | 0         | 0.3061    | 0.0553    | 0         | 0.116     |
| 0         | 0         | 0.0055    | 0         | 0         | 0         | 0         | 0         | 0         |
| 0.0702    | 0.1294    | 0.076     | 0.2457    | 0.0524    | 0.1149    | 0.162     | 0.031     | 0.1177    |
| 0.0038    | 0         | 0         | 0         | 0.0044    | 0.0012    | 0.001     | 0         | 7.00E-04  |
| 0         | 0         | 0         | 0         | 0         | 0         | 0         | 0         | 0         |
| 0.0192    | 0.0185    | 0.0236    | 0.0321    | 0         | 0.0288    | 0.0181    | 0.0516    | 0.0072    |
| 0         | 0         | 0         | 0         | 0         | 0         | 0         | 0.0031    | 0         |
| 0.1152    | 0.0416    | 0.1053    | 0.1271    | 0.2507    | 0.2642    | 0.1474    | 0.346     | 0.0422    |
| 0.1058    | 0.0236    | 0.0254    | 0.06      | 0         | 0.0352    | 0.0823    | 0.0505    | 0         |
| 0.0675    | 0.0312    | 0.0244    | 0.0277    | 0.0301    | 0.0348    | 0.0492    | 0.0591    | 5.00E-04  |
| 0.0439    | 0         | 0.0105    | 0.0236    | 0.0021    | 0.018     | 0.0456    | 0.0214    | 0         |
| 0.0027    | 0.0045    | 0         | 7.00E-04  | 0.0032    | 0.0042    | 0.0023    | 0         | 1.00E-04  |
| 0         | 0         | 0.0028    | 0         | 0         | 0         | 5.00E-04  | 0         | 0         |
| 0.0072    | 0.0049    | 0.0077    | 0.0097    | 0.0172    | 0.0166    | 0.0081    | 0.0174    | 0.0112    |
| 0         | 0         | 0         | 0         | 0.0055    | 0         | 0         | 3.00E-04  | 0         |
| 0         | 0         | 0         | 0         | 0         | 0         | 0         | 0         | 0         |
| 0.05      | 0.0111    | 0.0123    | 0         | 0         | 0.0166    | 0.0441    | 0.0112    | 0         |
| 0.0253    | 0.0169    | 0.1718    | 0.0188    | 0.0753    | 0.0272    | 0.0467    | 0.0304    | 0.0108    |
| 0         | 0         | 0         | 0         | 0         | 0         | 0         | 0         | 0         |
| 0.0267    | 0.1405    | 0.0822    | 0.0538    | 0.0986    | 0.1238    | 0.101     | 0.2254    | 0.0455    |
| 0.0021    | 6.00E-04  | 0.0014    | 0         | 0.0094    | 0.0024    | 0.001     | 6.00E-04  | 0.0021    |
| 0         | 4.00E-04  | 3.00E-04  | 0         | 0         | 0         | 0         | 0         | 0         |
| 0.027     | 0.1118    | 0.0014    | 0         | 0.0065    | 0         | 0.0302    | 0         | 0.0286    |
| 0.004     | 0         | 0         | 0         | 0.0198    | 0.023     | 0         | 0         | 0.0123    |
| 5.00E-04  | 0.0219    | 0.0084    | 0         | 0.003     | 0.0046    | 0         | 0.0293    | 0.0107    |
| 0         | 0         | 0         | 0         | 0         | 0         | 0         | 0         | 0         |
| 0         | 0         | 0         | 0         | 0         | 0         | 0.0076    | 0         | 0         |
| 0         | 0         | 0         | 0         | 0         | 0         | 0         | 0         | 0         |
| 0.0107    | 0.003     | 0.1785    | 3.00E-04  | 0.0395    | 0         | 0.0171    | 0.0116    | 0         |

|        |        |        |          |        |        |          |        |        |
|--------|--------|--------|----------|--------|--------|----------|--------|--------|
| 0.1389 | 0.1647 | 0.0647 | 0.1468   | 0      | 0.0664 | 0        | 0      | 0.1014 |
| 0      | 0      | 0      | 0.0058   | 0      | 0      | 0        | 0      | 0      |
| 0.007  | 0      | 0.0235 | 0        | 0.0132 | 0      | 0.011    | 0.113  | 0.0181 |
| 0.0748 | 0.0672 | 0.0419 | 0.0236   | 0      | 0.0776 | 0        | 0      | 0.0468 |
| 0      | 0.01   | 0      | 0        | 0      | 0.0052 | 0        | 0.0152 | 0      |
| 0.2868 | 0.1802 | 0.1546 | 0.0739   | 0.0954 | 0.1738 | 0.2235   | 0.2887 | 0.0423 |
| 0.0078 | 0.0357 | 0.0385 | 4.00E-04 | 0      | 0      | 0.0942   | 0.0053 | 0      |
| 0.0397 | 0      | 0      | 0.0147   | 0      | 0      | 0.023    | 0      | 0      |
| 0.069  | 0.0199 | 0.0403 | 0.0096   | 0.0151 | 0      | 0.1242   | 0.0573 | 0      |
| 0.0632 | 0.0244 | 0.029  | 0.0048   | 0.03   | 0.0036 | 0.1182   | 0.0515 | 0      |
| 0      | 0      | 0      | 0        | 0.0016 | 0      | 0        | 0      | 0      |
| 0.0818 | 0      | 0      | 0.0516   | 0      | 0.0023 | 2.00E-04 | 0.07   | 0      |
| 0      | 0      | 0      | 0        | 0.0031 | 0      | 0        | 0      | 0      |
| 0.1057 | 0.027  | 0.0253 | 0.0405   | 0.0021 | 0.0373 | 0.0877   | 0.0419 | 0.0013 |
| 0.0898 | 0.053  | 0.0544 | 0.1009   | 0.025  | 0.1619 | 0.1314   | 0.0401 | 0.0597 |
| 0.1955 | 0.08   | 0.0798 | 0.1414   | 0.0271 | 0.1992 | 0.2191   | 0.082  | 0.061  |

TARGET.4C TARGET.4C TARGET.4C TARGET.4C TARGET.4C TARGET.4C TARGET.40.PAVECB

|          |        |        |          |          |          |          |
|----------|--------|--------|----------|----------|----------|----------|
| 0        | 0.0016 | 0.0019 | 0        | 0        | 0        | 0        |
| 0        | 0      | 0      | 0        | 0        | 0        | 0        |
| 0        | 0      | 0      | 0        | 0        | 0.0275   | 0        |
| 0.2527   | 0      | 0.1076 | 0.007    | 0        | 0.118    | 0        |
| 0        | 0      | 0      | 8.00E-04 | 0        | 0        | 0        |
| 0        | 0      | 0.0465 | 0        | 0        | 0.0113   | 0        |
| 0.0041   | 0.0116 | 0.0785 | 0        | 0.0299   | 0.0035   | 0        |
| 0        | 0      | 0.0196 | 0        | 0        | 0.0245   | 4.00E-04 |
| 0        | 0      | 0      | 0        | 0        | 0        | 0        |
| 0        | 0      | 0      | 0.0052   | 0        | 0        | 0        |
| 0        | 0      | 0      | 0.0106   | 0        | 0        | 0        |
| 0        | 0      | 0      | 0        | 0        | 0        | 0        |
| 0        | 0      | 0      | 0.0056   | 0        | 0        | 0        |
| 0.0269   | 0.0343 | 0.0481 | 0.0391   | 0.0201   | 0.0383   | 0.0065   |
| 0        | 0      | 0      | 0        | 0.0011   | 0.0038   | 0.0141   |
| 0        | 0.0121 | 0.0692 | 0.0345   | 0        | 0        | 0.1176   |
| 0        | 0      | 0      | 0.0125   | 0        | 0.0466   | 0.001    |
| 7.00E-04 | 0      | 0      | 0        | 0.0023   | 9.00E-04 | 0        |
| 0.0337   | 0.0403 | 0.076  | 0        | 0.1061   | 0.0445   | 0.0372   |
| 0        | 0      | 0      | 0        | 0.0011   | 0        | 0        |
| 0        | 0.005  | 0      | 4.00E-04 | 0.0096   | 0.0021   | 0.0016   |
| 0        | 0      | 0      | 0        | 0        | 0        | 0        |
| 0        | 0.0996 | 0.2161 | 0.1376   | 0.0844   | 0        | 0.2402   |
| 0        | 0      | 0      | 0        | 0        | 0        | 0.0053   |
| 0.0977   | 0.2101 | 0.1681 | 0.088    | 0.2885   | 0.0487   | 0.2502   |
| 0.002    | 0      | 0.0041 | 0        | 0        | 0        | 0        |
| 0        | 0      | 0      | 0        | 0        | 0        | 0        |
| 8.00E-04 | 0.0104 | 0.0219 | 0.0499   | 0.0463   | 0.0105   | 0        |
| 0        | 0      | 0      | 0        | 0        | 0        | 0        |
| 0.1901   | 0.2725 | 0.0013 | 0.2183   | 0.2718   | 0.3806   | 0.2158   |
| 0.0071   | 0.0074 | 0      | 0        | 0.0795   | 0.0356   | 0.0177   |
| 0.0072   | 0.0056 | 0      | 0        | 0.0555   | 0.0198   | 0.0094   |
| 0.0028   | 0      | 0      | 0        | 0.0261   | 0.0137   | 0.006    |
| 0        | 0      | 0      | 0.0013   | 0        | 0        | 0        |
| 0        | 0      | 0.0016 | 0        | 0.0047   | 2.00E-04 | 3.00E-04 |
| 0.007    | 0.0168 | 0.005  | 0.0118   | 0.0135   | 0.0034   | 0.005    |
| 0        | 0      | 0      | 0        | 0        | 0        | 0        |
| 0        | 0      | 0      | 0        | 0        | 0        | 0.0035   |
| 0        | 0      | 0      | 0        | 0.0215   | 0.032    | 0        |
| 0.0243   | 0.0284 | 0.0242 | 0.0126   | 0.0039   | 0.0457   | 0.0142   |
| 0        | 0      | 0      | 0        | 0        | 0        | 0        |
| 0.0404   | 0.1836 | 0.0998 | 0        | 0.0315   | 0.0109   | 0.0068   |
| 0.0046   | 0.001  | 0.009  | 0.0027   | 0        | 0.0027   | 0.0059   |
| 0        | 0      | 0      | 0        | 0        | 0        | 0        |
| 0        | 0      | 0      | 0        | 0.0148   | 0        | 0        |
| 0.0076   | 0      | 0.0707 | 0        | 0.0559   | 0        | 0        |
| 0.0094   | 0.0097 | 0.0036 | 0.0201   | 0.0092   | 0.0324   | 0.0181   |
| 0        | 0      | 0      | 0        | 0        | 0        | 0        |
| 0        | 0      | 0.0132 | 0        | 0        | 0        | 0        |
| 0        | 0      | 0      | 0        | 2.00E-04 | 0        | 0        |
| 0.0074   | 0.0043 | 0.0106 | 0        | 0        | 0.0094   | 0        |

|        |        |        |          |        |        |        |
|--------|--------|--------|----------|--------|--------|--------|
| 0.1273 | 0.0523 | 0.0624 | 0.1617   | 0.0616 | 0.0507 | 0.165  |
| 0      | 0      | 0      | 0        | 0      | 0      | 0      |
| 0      | 0.0134 | 0.0027 | 0.0207   | 0.0315 | 0      | 0      |
| 0.0649 | 0      | 0.0584 | 0.1227   | 0.0148 | 0.034  | 0.0088 |
| 0      | 0      | 0      | 0        | 0      | 0.009  | 0      |
| 0.1967 | 0      | 0.0323 | 0        | 0.2576 | 0.1937 | 0.1697 |
| 0.0081 | 0      | 0      | 2.00E-04 | 0.0173 | 0.0113 | 0.0093 |
| 0      | 0.0295 | 0.0027 | 0.067    | 0.0825 | 0.1228 | 0.0041 |
| 0.0178 | 0.0141 | 0.044  | 0        | 0.0508 | 0.0335 | 0.0217 |
| 0.0076 | 0.0076 | 0.0303 | 0        | 0.0465 | 0.0119 | 0.0155 |
| 0      | 0      | 0      | 0        | 0      | 0.0039 | 0      |
| 0.0065 | 0      | 0      | 0.0261   | 0      | 0      | 0      |
| 0      | 0      | 0      | 0        | 0      | 0      | 0      |
| 0.0052 | 0.0049 | 0      | 0.0049   | 0.0696 | 0.064  | 0.0118 |
| 0.0168 | 0.0707 | 0.147  | 0.0688   | 0.0952 | 0.0222 | 0.1387 |
| 0.022  | 0.0757 | 0.147  | 0.0737   | 0.1648 | 0.0862 | 0.1505 |
