# Supplementary material for: Analysis of Immune Gene Expression Subtypes Reveals Osteosarcoma Immune Heterogeneity
Source: Hindawi journal article supplement (doi:10.1155/2021/6649412), 2021-03-01
Supplement: f1 [file 6649412.f1.zip]

| sample           | RFS_Event | RFS_time |
|------------------|-----------|----------|
| TARGET.40.PALWWX | 0         | 2163     |
| TARGET.40.PAMEKS | 1         | 385      |
| TARGET.40.PAMLKS | 1         | 71       |
| TARGET.40.PAMRHD | 1         | 39       |
| TARGET.40.PAMYYJ | 1         | 128      |
| TARGET.40.PANMIG | 1         | 513      |
| TARGET.40.PANPUM | 1         | 46       |
| TARGET.40.PANZHX | 1         | 812      |
| TARGET.40.PAPIJR | 0         | 1719     |
| TARGET.40.PAPKWD | 1         | 192      |
| TARGET.40.PAPNVD | 1         | 594      |
| TARGET.40.PAPWWC | 1         | 1933     |
| TARGET.40.PAPXGT | 0         | 2526     |
| TARGET.40.PARBGW | 0         | 286      |
| TARGET.40.PARDAX | 1         | 105      |
| TARGET.40.PARFTG | 1         | 53       |
| TARGET.40.PARGTM | 0         | 2610     |
| TARGET.40.PARJXU | 1         | 811      |
| TARGET.40.PARKAF | 1         | 56       |
| TARGET.40.PASEBY | 1         | 42       |
| TARGET.40.PASEFS | 0         | 2112     |
| TARGET.40.PASFCV | 0         | 2062     |
| TARGET.40.PASKZZ | 0         | 542      |
| TARGET.40.PASSLM | 1         | 1865     |
| TARGET.40.PASUUH | 0         | 1625     |
| TARGET.40.PASYUK | 0         | 1870     |
| TARGET.40.PATAWV | 0         | 1702     |
| TARGET.40.PATJVI | 0         | 1575     |
| TARGET.40.PATKSS | 1         | 63       |
| TARGET.40.PATMIF | 0         | 1580     |
| TARGET.40.PATMPU | 1         | 498      |
| TARGET.40.PATPBS | 0         | 1468     |
| TARGET.40.PATXFN | 0         | 1363     |
| TARGET.40.PASNZV | 0         | 1747     |
| TARGET.40.PASRNE | 1         | 512      |
| TARGET.40.PATEEM | 1         | 961      |
| TARGET.40.PATUXZ | 1         | 510      |
| TARGET.40.PAUBIT | 0         | 1029     |
| TARGET.40.PAUTWB | 1         | 598      |
| TARGET.40.PAUTYB | 1         | 527      |
| TARGET.40.PAUUML | 0         | 672      |
| TARGET.40.PAUVUL | 1         | 237      |
| TARGET.40.PAUXPZ | 1         | 419      |
| TARGET.40.PAUYTT | 0         | 579      |
| TARGET.40.PAVALD | 0         | 551      |
| TARGET.40.PAVCLP | 0         | 511      |
| TARGET.40.PAVDTY | 0         | 369      |
| TARGET.40.PAVECB | 0         | 476      |
| TARGET.40.PATMXR | 1         | 68       |
| TARGET.40.OA4HLD | 0         | 3946     |
| TARGET.40.OA4HMC | 0         | 377      |

|                  |   |      |
|------------------|---|------|
| TARGET.40.0A4HX8 | 0 | 3050 |
| TARGET.40.0A4HXS | 0 | 2948 |
| TARGET.40.0A4HY5 | 1 | 218  |
| TARGET.40.0A4HYB | 0 | 1240 |
| TARGET.40.0A4IOQ | 1 | 519  |
| TARGET.40.0A4IOS | 0 | 603  |
| TARGET.40.0A4IOW | 0 | 683  |
| TARGET.40.0A4I3S | 0 | 1844 |
| TARGET.40.0A4I42 | 1 | 351  |
| TARGET.40.0A4I48 | 0 | 1616 |
| TARGET.40.0A4I4E |   |      |
| TARGET.40.0A4I4M | 0 | 708  |
| TARGET.40.0A4I4O | 1 | 235  |
| TARGET.40.0A4I5B | 0 | 619  |
| TARGET.40.0A4I6O | 1 | 484  |
| TARGET.40.0A4I8U | 0 | 983  |
| TARGET.40.PAPFLB |   |      |
| TARGET.40.PAKFVX | 1 | 361  |
| TARGET.40.PAKXLD | 1 | 578  |
| TARGET.40.PAKZZK | 1 | 452  |
| TARGET.40.PAKUZU | 0 | 0    |
| TARGET.40.PALECC | 1 | 384  |
| TARGET.40.PALFYN | 1 | 651  |
| TARGET.40.PALHRL | 0 | 4374 |
| TARGET.40.PALKDP | 0 | 3282 |
| TARGET.40.PALKGN | 0 | 2122 |
| TARGET.40.PALZGU | 1 | 1452 |
| TARGET.40.PAMHLF | 0 | 1913 |
| TARGET.40.PAMHYN | 0 | 3900 |
| TARGET.40.PAMJXS | 1 | 3184 |
| TARGET.40.PAMTCM | 0 | 3002 |
| TARGET.40.PANGPE | 1 | 833  |
| TARGET.40.PANGRW | 0 | 3378 |
| TARGET.40.PANSEN | 0 | 2256 |
| TARGET.40.PANVJJ | 0 | 3095 |
| TARGET.40.PANXSC | 1 | 366  |
| TARGET.40.PANZZJ | 0 | 1538 |
| TARGET.40.PAPVYW | 1 | 69   |
| TARGET.40.0A4I65 | 1 | 1993 |
| TARGET.40.0A4I9I | 1 | 2014 |
| TARGET.40.0A4I9K |   | 2257 |

| OS_Event | OS_time | Gender | Race                      | Age   | location         |
|----------|---------|--------|---------------------------|-------|------------------|
| 0        | 2163    | Female | White                     | 4464  | Distal           |
| 1        | 857     | Male   | Asian                     | 3942  | Distal           |
| 1        | 180     | Female | White                     | 4509  | Distal           |
| 1        | 74      | Female | Unknown                   | 3942  | Distal           |
| 1        | 271     | Male   | White                     | 6477  |                  |
| 1        | 776     | Male   | White                     | 5360  | Proximal         |
| 1        | 295     | Male   | White                     | 5996  |                  |
| 0        | 1323    | Female | Asian                     | 5127  |                  |
| 0        | 1719    | Female | White                     | 4597  | Distal           |
| 1        | 422     | Male   | White                     | 3478  | Distal           |
| 1        | 922     | Female | White                     | 5289  | Proximal         |
| 0        | 2520    | Female | White                     | 3595  | Distal           |
| 0        | 2526    | Female | Black or African American | 4172  | Proximal         |
| 0        | 286     | Female | Unknown                   | 4634  | Distal           |
| 1        | 679     | Male   | White                     | 3680  | Distal           |
| 1        | 653     | Female | Asian                     | 4987  | Distal           |
| 0        | 2610    | Male   | White                     | 5925  | Proximal         |
| 1        | 1631    | Female | White                     | 4624  | Distal           |
| 1        | 1061    | Male   | White                     | 6085  | Distal           |
| 0        | 2049    | Male   | White                     | 4249  | Distal           |
| 0        | 2112    | Male   | White                     | 6625  | Proximal         |
| 0        | 2062    | Female | White                     | 3849  | Proximal         |
| 0        | 542     | Female | White                     | 4808  | Proximal         |
| 0        | 1865    | Male   | White                     | 3538  | Proximal         |
| 0        | 1625    | Female | White                     | 5143  | Proximal         |
| 0        | 1870    | Female | Unknown                   | 5931  | Proximal         |
| 0        | 1702    | Male   | White                     | 5667  | Proximal         |
| 0        | 1575    | Male   | White                     | 5755  | Proximal         |
| 1        | 758     | Male   | White                     | 4889  |                  |
| 0        | 1580    | Female | White                     | 4383  | Distal           |
| 1        | 1579    | Male   | Unknown                   | 5060  | Proximal         |
| 0        | 1468    | Male   | White                     | 5513  | Proximal         |
| 0        | 1363    | Female | White                     | 4964  | Proximal         |
| 0        | 1747    | Male   | White                     | 5947  |                  |
| 0        | 1707    | Female | White                     | 1299  |                  |
| 0        | 1451    | Male   | White                     | 5875  |                  |
| 1        | 510     | Female | Unknown                   | 6345  |                  |
| 0        | 1029    | Female | White                     | 4513  |                  |
| 0        | 687     | Male   | White                     | 5064  |                  |
| 1        | 537     | Female | White                     | 4418  |                  |
| 0        | 672     | Male   | Unknown                   | 2177  |                  |
| 1        | 347     | Female | Black or African American | 2027  |                  |
| 1        | 606     | Female | Unknown                   | 4507  |                  |
| 0        | 579     | Female | White                     | 6702  |                  |
| 0        | 551     | Male   | White                     | 5924  |                  |
| 0        | 511     | Female | Black or African American | 4062  |                  |
| 0        | 369     | Male   | White                     | 4898  |                  |
| 0        | 476     | Female | White                     | 3272  |                  |
| 1        | 386     | Female | Unknown                   | 7631  |                  |
| 0        | 3946    | Male   |                           | 7254  | Proximal         |
| 0        | 377     | Male   | White                     | 10205 | Other, Not speci |

|   |      |        |                           |       |                  |
|---|------|--------|---------------------------|-------|------------------|
| 0 | 1750 | Male   | White                     | 10635 | Distal           |
| 0 | 2948 | Male   | White                     | 8470  | Distal           |
| 1 | 290  | Male   |                           | 7264  | Other, Posterior |
| 0 | 1240 | Female |                           | 18919 | Distal           |
| 1 | 519  | Female |                           | 7269  | Distal           |
| 0 | 603  | Male   |                           | 9114  | Other, Anterior  |
| 0 | 683  | Male   | Asian                     | 7330  | Distal           |
| 0 | 1844 | Male   | Black or African American | 8313  | Other, Posterior |
| 1 | 619  | Female |                           | 6268  | Proximal         |
| 0 | 1616 | Female |                           | 5854  | Distal           |
|   |      | Male   |                           | 5978  | Proximal         |
| 0 | 708  | Female | Asian                     | 6916  | Proximal         |
| 1 | 627  | Male   | White                     | 11828 | Distal           |
| 0 | 619  | Male   |                           | 7615  | Proximal         |
| 1 | 1906 | Male   |                           | 6738  | Distal           |
| 0 | 983  | Male   |                           | 7328  | Distal           |
|   |      | Male   | White                     | 5496  |                  |
| 0 | 922  | Male   | Unknown                   | 5407  | Distal           |
| 0 | 2462 | Female | White                     | 5245  | Proximal         |
| 1 | 1515 | Male   | White                     | 4864  | Distal           |
| 0 | 0    | Male   | Asian                     | 7270  |                  |
| 1 | 754  | Female | Unknown                   | 3661  |                  |
| 1 | 1003 | Female | White                     | 4841  |                  |
| 0 | 4374 | Male   | Black or African American | 6019  |                  |
| 0 | 3282 | Female | White                     | 3388  | Distal           |
| 0 | 2122 | Male   | White                     | 6190  |                  |
| 1 | 2882 | Male   | White                     | 5603  | Distal           |
| 0 | 1913 | Male   | White                     | 3233  |                  |
| 0 | 3900 | Female | Asian                     | 3499  |                  |
| 1 | 3862 | Male   | Black or African American | 4100  |                  |
| 0 | 3002 | Female | Black or African American | 4938  |                  |
| 0 | 3378 | Male   | White                     | 4794  |                  |
| 0 | 3378 | Male   | White                     | 6088  | Distal           |
| 0 | 2256 | Male   | White                     | 5234  | Proximal         |
| 0 | 3095 | Female | White                     | 5044  |                  |
| 0 | 1217 | Male   | White                     | 5545  | Distal           |
| 0 | 1538 | Male   | White                     | 6855  |                  |
| 1 | 78   | Male   | Black or African American | 2803  |                  |
| 0 | 5840 | Male   |                           | 6520  | Proximal         |
| 1 | 2014 | Male   |                           | 32518 | Distal           |
| 0 | 2257 | Male   |                           | 8237  | Proximal         |
