# Supplementary material for: Analysis of Immune Gene Expression Subtypes Reveals Osteosarcoma Immune Heterogeneity
Source: Hindawi journal article supplement (doi:10.1155/2021/6649412), 2021-03-01
Supplement: f1 [file 6649412.f1.zip]

| immCells                      | pvalue      | FDR         |
|-------------------------------|-------------|-------------|
| Adipocytes                    | 5.43E-01    | 6.56E-01    |
| Astrocytes                    | 5.99E-01    | 6.56E-01    |
| B-cells                       | 0.400369778 | 0.550508445 |
| Basophils                     | 1.65E-03    | 7.78E-03    |
| CD4+ T-cells                  | 2.24E-01    | 4.48E-01    |
| CD4+ Tcm                      | 4.16E-01    | 5.61E-01    |
| CD4+ Tem                      | 8.98E-04    | 4.56E-03    |
| CD4+ memory T-cells           | 3.82E-01    | 5.48E-01    |
| CD4+ naive T-cells            | 6.06E-01    | 6.56E-01    |
| CD8+ T-cells                  | 2.99E-01    | 5.19E-01    |
| CD8+ Tcm                      | 0.328669182 | 0.531987215 |
| CD8+ Tem                      | 0.332429779 | 0.531987215 |
| CD8+ naive T-cells            | 0.195746348 | 0.41675029  |
| CLP                           | 6.03E-03    | 2.34E-02    |
| CMP                           | 9.60E-02    | 2.62E-01    |
| Chondrocytes                  | 5.03E-05    | 3.69E-04    |
| Class-switched memory B-cells | 1.27E-01    | 2.99E-01    |
| DC                            | 3.11E-02    | 1.03E-01    |
| Endothelial cells             | 1.12E-04    | 6.71E-04    |
| Eosinophils                   | 1.41E-01    | 3.21E-01    |
| Epithelial cells              | 1.91E-02    | 7.01E-02    |
| Erythrocytes                  | 3.47E-01    | 5.32E-01    |
| Fibroblasts                   | 1.65E-09    | 2.18E-08    |
| GMP                           | 6.99E-01    | 7.33E-01    |
| HSC                           | 2.22E-01    | 4.48E-01    |
| Hepatocytes                   | 4.29E-01    | 5.66E-01    |
| Keratinocytes                 | 5.84E-01    | 6.56E-01    |
| MEP                           | 0.711812361 | 0.734056497 |
| MPP                           | 0.354985193 | 0.53247779  |
| MSC                           | 0.344855126 | 0.531987215 |
| Macrophages                   | 6.58E-12    | 2.00E-10    |
| Macrophages M1                | 1.29E-10    | 2.13E-09    |
| Macrophages M2                | 2.13E-08    | 2.34E-07    |
| Mast cells                    | 0.022019766 | 0.076489714 |
| Megakaryocytes                | 0.506643174 | 0.630914142 |
| Melanocytes                   | 0.277065205 | 0.494224419 |
| Memory B-cells                | 6.69E-01    | 7.13E-01    |
| Mesangial cells               | 2.60E-01    | 4.94E-01    |
| Monocytes                     | 2.48E-12    | 1.64E-10    |
| Myocytes                      | 6.02E-01    | 6.56E-01    |
| NK cells                      | NA          | NA          |
| NKT                           | 4.86E-01    | 6.17E-01    |
| Neurons                       | 4.14E-02    | 0.130230956 |
| Neutrophils                   | 3.80E-01    | 5.48E-01    |
| Osteoblast                    | 1.22E-01    | 2.98E-01    |
| Pericytes                     | 4.59E-01    | 5.94E-01    |
| Plasma cells                  | 3.18E-01    | 0.531987215 |
| Platelets                     | 2.68E-01    | 4.94E-01    |
| Preadipocytes                 | 8.45E-01    | 8.58E-01    |
| Sebocytes                     | 5.84E-01    | 6.56E-01    |
| Skeletal muscle               | 8.92E-01    | 8.92E-01    |

|                       |             |             |
|-----------------------|-------------|-------------|
| Smooth muscle         | 2.75E-01    | 4.94E-01    |
| Tgd cells             | 1.19E-01    | 2.98E-01    |
| Th1 cells             | 0.559635012 | 0.655818607 |
| Th2 cells             | 1.83E-01    | 4.03E-01    |
| Tregs                 | 5.90E-01    | 6.56E-01    |
| aDC                   | 1.19E-07    | 1.12E-06    |
| cDC                   | 0.392966854 | 0.550508445 |
| iDC                   | 0.001958455 | 0.008617202 |
| ly Endothelial cells  | 0.000422785 | 0.002325319 |
| mv Endothelial cells  | 9.43E-05    | 0.000622165 |
| naive B-cells         | 0.099141401 | 0.261733298 |
| pDC                   | 0.077455629 | 0.232366888 |
| pro B-cells           | 0.08913913  | 0.255790547 |
| ImmuneScore           | 9.09E-12    | 2.00E-10    |
| StromaScore           | 0.003802298 | 0.01568448  |
| MicroenvironmentScore | 7.57E-07    | 6.25E-06    |
