# Supplementary material for: Analysis of Immune Gene Expression Subtypes Reveals Osteosarcoma Immune Heterogeneity
Source: Hindawi journal article supplement (doi:10.1155/2021/6649412), 2021-03-01
Supplement: f1 [file 6649412.f1.zip]

| k | cluster | item   | itemConsensus |
|---|---------|--------|---------------|
| 7 | 1       | 2      | 0.74836571    |
| 7 | 2       | 23460  | 0.947034253   |
| 7 | 2       | 10351  | 0.945216922   |
| 7 | 2       | 10350  | 0.950201497   |
| 7 | 3       | 5243   | 0.765990848   |
| 7 | 2       | 10060  | 0.885234256   |
| 7 | 4       | 225    | 0.572815815   |
| 7 | 1       | 51225  | 0.794470985   |
| 7 | 2       | 25890  | 0.887077794   |
| 7 | 3       | 1636   | 0.829496732   |
| 7 | 6       | 43     | 0.783319033   |
| 7 | 2       | 55289  | 0.946213577   |
| 7 | 1       | 54     | 0.797178931   |
| 7 | 3       | 51703  | 0.746645229   |
| 7 | 4       | 59     | 0.894632621   |
| 7 | 4       | 87     | 0.895241794   |
| 7 | 6       | 90     | 0.760048449   |
| 7 | 6       | 91     | 0.896819734   |
| 7 | 2       | 92     | 0.756714978   |
| 7 | 2       | 93     | 0.943655231   |
| 7 | 3       | 94     | 0.834054961   |
| 7 | 6       | 8038   | 0.775645494   |
| 7 | 1       | 10863  | 0.446196523   |
| 7 | 1       | 101    | 0.470982585   |
| 7 | 1       | 27299  | 0.802917739   |
| 7 | 1       | 81794  | 0.727421561   |
| 7 | 4       | 81792  | 0.842831333   |
| 7 | 4       | 140766 | 0.893540045   |
| 7 | 2       | 170690 | 0.717641689   |
| 7 | 3       | 9509   | 0.794911885   |
| 7 | 4       | 9507   | 0.891458734   |
| 7 | 6       | 11096  | 0.755421139   |
| 7 | 3       | 56999  | 0.818322781   |
| 7 | 3       | 9719   | 0.825909955   |
| 7 | 5       | 23536  | 0.399682907   |
| 7 | 3       | 196883 | 0.820624354   |
| 7 | 2       | 116    | 0.944679881   |
| 7 | 3       | 135    | 0.63422576    |
| 7 | 7       | 141    | 0.567392328   |
| 7 | 4       | 150    | 0.881571748   |
| 7 | 5       | 11047  | 0.536460105   |
| 7 | 4       | 165    | 0.894636297   |
| 7 | 2       | 3899   | 0.945746515   |
| 7 | 4       | 185    | 0.875285051   |
| 7 | 5       | 199    | 0.598327803   |
| 7 | 4       | 9447   | 0.889591636   |
| 7 | 6       | 9590   | 0.871779023   |
| 7 | 6       | 11217  | 0.882257208   |
| 7 | 2       | 9495   | 0.725421349   |
| 7 | 5       | 80709  | 0.576225569   |
| 7 | 7       | 216    | 0.397067927   |

|   |   |        |             |
|---|---|--------|-------------|
| 7 | 7 | 221    | 0.566720997 |
| 7 | 5 | 240    | 0.592606766 |
| 7 | 5 | 241    | 0.579581047 |
| 7 | 2 | 59344  | 0.947053934 |
| 7 | 2 | 268    | 0.467972499 |
| 7 | 2 | 269    | 0.946365733 |
| 7 | 3 | 386724 | 0.655953574 |
| 7 | 7 | 270    | 0.526401875 |
| 7 | 4 | 273    | 0.881749053 |
| 7 | 4 | 9068   | 0.690326363 |
| 7 | 4 | 23452  | 0.888286936 |
| 7 | 6 | 287    | 0.889510439 |
| 7 | 6 | 26057  | 0.899156071 |
| 7 | 5 | 118932 | 0.541788094 |
| 7 | 6 | 91526  | 0.853541554 |
| 7 | 4 | 84168  | 0.863726547 |
| 7 | 1 | 118429 | 0.326379931 |
| 7 | 1 | 309    | 0.775535129 |
| 7 | 5 | 313    | 0.581258299 |
| 7 | 3 | 8639   | 0.814956014 |
| 7 | 6 | 8905   | 0.79338174  |
| 7 | 1 | 8546   | 0.412815022 |
| 7 | 1 | 54518  | 0.54529274  |
| 7 | 6 | 323    | 0.857187009 |
| 7 | 7 | 200315 | 0.595790288 |
| 7 | 2 | 140564 | 0.888456306 |
| 7 | 7 | 60489  | 0.664588789 |
| 7 | 5 | 341    | 0.591684765 |
| 7 | 1 | 344    | 0.548122746 |
| 7 | 5 | 348    | 0.588102775 |
| 7 | 7 | 80833  | 0.684764568 |
| 7 | 7 | 80830  | 0.704250627 |
| 7 | 2 | 89872  | 0.941573357 |
| 7 | 3 | 358    | 0.556136293 |
| 7 | 7 | 366    | 0.719220902 |
| 7 | 5 | 374    | 0.374841217 |
| 7 | 2 | 55843  | 0.929069601 |
| 7 | 6 | 93663  | 0.558349505 |
| 7 | 2 | 58504  | 0.901187547 |
| 7 | 5 | 9938   | 0.498361584 |
| 7 | 5 | 257106 | 0.603607429 |
| 7 | 1 | 393    | 0.575200232 |
| 7 | 6 | 395    | 0.752893955 |
| 7 | 1 | 64333  | 0.584734835 |
| 7 | 5 | 397    | 0.565157857 |
| 7 | 3 | 22899  | 0.831986248 |
| 7 | 3 | 9459   | 0.701174175 |
| 7 | 7 | 10865  | 0.673047071 |
| 7 | 6 | 10550  | 0.50513087  |
| 7 | 1 | 408    | 0.640180453 |
| 7 | 5 | 409    | 0.578841814 |
| 7 | 1 | 411    | 0.679865661 |

|   |   |        |             |
|---|---|--------|-------------|
| 7 | 2 | 420    | 0.947773068 |
| 7 | 7 | 427    | 0.596566953 |
| 7 | 1 | 433    | 0.795031233 |
| 7 | 4 | 54829  | 0.892402923 |
| 7 | 2 | 80150  | 0.897550221 |
| 7 | 6 | 55252  | 0.896609512 |
| 7 | 6 | 11101  | 0.884151495 |
| 7 | 4 | 57194  | 0.893737144 |
| 7 | 2 | 489    | 0.948320716 |
| 7 | 2 | 10396  | 0.904275898 |
| 7 | 3 | 79895  | 0.589254415 |
| 7 | 3 | 552    | 0.549609226 |
| 7 | 2 | 563    | 0.945306452 |
| 7 | 7 | 567    | 0.430999706 |
| 7 | 2 | 27087  | 0.943841212 |
| 7 | 6 | 55024  | 0.523511319 |
| 7 | 5 | 10538  | 0.517646573 |
| 7 | 7 | 116071 | 0.72554498  |
| 7 | 5 | 597    | 0.53110301  |
| 7 | 2 | 79370  | 0.941973838 |
| 7 | 3 | 255877 | 0.834499259 |
| 7 | 4 | 624    | 0.878523302 |
| 7 | 2 | 8419   | 0.943481341 |
| 7 | 3 | 633    | 0.609585327 |
| 7 | 6 | 80114  | 0.891475327 |
| 7 | 5 | 51411  | 0.575887402 |
| 7 | 6 | 57448  | 0.895893473 |
| 7 | 2 | 640    | 0.946090799 |
| 7 | 2 | 650    | 0.555868601 |
| 7 | 6 | 55589  | 0.778625106 |
| 7 | 1 | 655    | 0.691524159 |
| 7 | 6 | 657    | 0.883373138 |
| 7 | 2 | 658    | 0.946766924 |
| 7 | 6 | 659    | 0.871035411 |
| 7 | 4 | 54796  | 0.888330801 |
| 7 | 7 | 683    | 0.548101186 |
| 7 | 5 | 684    | 0.565293313 |
| 7 | 1 | 695    | 0.661048181 |
| 7 | 5 | 151888 | 0.382695478 |
| 7 | 6 | 10385  | 0.882814003 |
| 7 | 7 | 11119  | 0.714714136 |
| 7 | 7 | 11118  | 0.656197405 |
| 7 | 7 | 10384  | 0.700377702 |
| 7 | 1 | 170371 | 0.799036385 |
| 7 | 5 | 9556   | 0.327787152 |
| 7 | 5 | 84419  | 0.39064255  |
| 7 | 2 | 283897 | 0.946768786 |
| 7 | 2 | 199675 | 0.403870422 |
| 7 | 2 | 79098  | 0.73082311  |
| 7 | 2 | 148345 | 0.94932927  |
| 7 | 5 | 128346 | 0.588564246 |
| 7 | 3 | 79630  | 0.627322243 |

|   |   |        |             |
|---|---|--------|-------------|
| 7 | 5 | 712    | 0.576912767 |
| 7 | 5 | 713    | 0.585660472 |
| 7 | 5 | 714    | 0.592566505 |
| 7 | 4 | 114905 | 0.894260945 |
| 7 | 5 | 717    | 0.557584556 |
| 7 | 5 | 718    | 0.58150903  |
| 7 | 5 | 719    | 0.586635545 |
| 7 | 5 | 728    | 0.556360792 |
| 7 | 2 | 730    | 0.942449248 |
| 7 | 4 | 775    | 0.888203699 |
| 7 | 2 | 9254   | 0.893950761 |
| 7 | 1 | 93589  | 0.797749325 |
| 7 | 2 | 794    | 0.774444674 |
| 7 | 4 | 800    | 0.874034305 |
| 7 | 7 | 811    | 0.5215026   |
| 7 | 1 | 8536   | 0.290373839 |
| 7 | 2 | 814    | 0.948105576 |
| 7 | 6 | 821    | 0.890653246 |
| 7 | 5 | 84433  | 0.574747024 |
| 7 | 6 | 22900  | 0.812676493 |
| 7 | 5 | 64170  | 0.582750055 |
| 7 | 1 | 838    | 0.732685061 |
| 7 | 4 | 857    | 0.893976973 |
| 7 | 2 | 26112  | 0.943595593 |
| 7 | 5 | 6357   | 0.532952842 |
| 7 | 3 | 6358   | 0.858848238 |
| 7 | 2 | 6359   | 0.946289374 |
| 7 | 2 | 6360   | 0.949986971 |
| 7 | 1 | 6361   | 0.76186367  |
| 7 | 5 | 6362   | 0.549376005 |
| 7 | 5 | 6363   | 0.548149681 |
| 7 | 2 | 6364   | 0.943172835 |
| 7 | 5 | 6366   | 0.539870012 |
| 7 | 2 | 6367   | 0.946307254 |
| 7 | 5 | 6368   | 0.535562475 |
| 7 | 3 | 6369   | 0.733353658 |
| 7 | 2 | 6370   | 0.947662091 |
| 7 | 5 | 10344  | 0.268787075 |
| 7 | 5 | 6347   | 0.591083228 |
| 7 | 6 | 56477  | 0.905582855 |
| 7 | 5 | 6348   | 0.595086832 |
| 7 | 5 | 414062 | 0.557323899 |
| 7 | 5 | 6351   | 0.586172463 |
| 7 | 5 | 6352   | 0.524758293 |
| 7 | 7 | 6354   | 0.731638998 |
| 7 | 5 | 6355   | 0.430980356 |
| 7 | 6 | 904    | 0.888128688 |
| 7 | 5 | 2826   | 0.318980575 |
| 7 | 1 | 1230   | 0.798507951 |
| 7 | 5 | 729230 | 0.526434862 |
| 7 | 2 | 1232   | 0.947612328 |
| 7 | 2 | 1233   | 0.946539688 |

|   |   |        |             |
|---|---|--------|-------------|
| 7 | 5 | 1234   | 0.57845527  |
| 7 | 2 | 1235   | 0.917605456 |
| 7 | 5 | 1236   | 0.541497912 |
| 7 | 2 | 1237   | 0.708800584 |
| 7 | 2 | 10803  | 0.791081379 |
| 7 | 1 | 9034   | 0.758744304 |
| 7 | 5 | 929    | 0.595688884 |
| 7 | 2 | 11126  | 0.953386579 |
| 7 | 5 | 9332   | 0.588239669 |
| 7 | 5 | 4064   | 0.570523467 |
| 7 | 2 | 930    | 0.374149484 |
| 7 | 1 | 909    | 0.768318074 |
| 7 | 2 | 910    | 0.903777353 |
| 7 | 5 | 911    | 0.527350416 |
| 7 | 5 | 912    | 0.364902838 |
| 7 | 2 | 913    | 0.948357875 |
| 7 | 3 | 4345   | 0.834930589 |
| 7 | 5 | 131450 | 0.567966297 |
| 7 | 6 | 50489  | 0.827095653 |
| 7 | 5 | 30835  | 0.568960813 |
| 7 | 2 | 10666  | 0.947451867 |
| 7 | 2 | 933    | 0.925721722 |
| 7 | 5 | 51744  | 0.46578659  |
| 7 | 4 | 57124  | 0.40135233  |
| 7 | 7 | 29126  | 0.560242874 |
| 7 | 5 | 940    | 0.584079096 |
| 7 | 5 | 914    | 0.550008868 |
| 7 | 5 | 11314  | 0.591329762 |
| 7 | 1 | 10871  | 0.794970787 |
| 7 | 5 | 342510 | 0.451284756 |
| 7 | 1 | 124599 | 0.79271322  |
| 7 | 5 | 146722 | 0.563808262 |
| 7 | 3 | 9936   | 0.570993116 |
| 7 | 1 | 945    | 0.794699197 |
| 7 | 3 | 947    | 0.835247231 |
| 7 | 6 | 948    | 0.447851891 |
| 7 | 5 | 951    | 0.578710254 |
| 7 | 5 | 915    | 0.555391513 |
| 7 | 5 | 916    | 0.542824685 |
| 7 | 2 | 917    | 0.935129509 |
| 7 | 1 | 958    | 0.795192594 |
| 7 | 5 | 959    | 0.430544042 |
| 7 | 5 | 962    | 0.514646954 |
| 7 | 1 | 920    | 0.799499094 |
| 7 | 5 | 1043   | 0.559781159 |
| 7 | 1 | 963    | 0.495285451 |
| 7 | 7 | 965    | 0.472882285 |
| 7 | 5 | 921    | 0.531193392 |
| 7 | 1 | 968    | 0.803490847 |
| 7 | 2 | 923    | 0.453474907 |
| 7 | 5 | 969    | 0.53513587  |
| 7 | 1 | 971    | 0.697965233 |

|   |   |        |             |
|---|---|--------|-------------|
| 7 | 5 | 972    | 0.588457518 |
| 7 | 5 | 924    | 0.569943033 |
| 7 | 5 | 973    | 0.523505342 |
| 7 | 3 | 974    | 0.529220843 |
| 7 | 5 | 941    | 0.565380424 |
| 7 | 1 | 8832   | 0.795561488 |
| 7 | 5 | 942    | 0.578669647 |
| 7 | 5 | 925    | 0.526419635 |
| 7 | 2 | 10225  | 0.370142376 |
| 7 | 6 | 56990  | 0.896430243 |
| 7 | 6 | 1009   | 0.794414322 |
| 7 | 2 | 28316  | 0.945485309 |
| 7 | 2 | 1001   | 0.618241543 |
| 7 | 3 | 1003   | 0.858423574 |
| 7 | 2 | 1004   | 0.946383613 |
| 7 | 2 | 6792   | 0.950866964 |
| 7 | 2 | 56971  | 0.733205513 |
| 7 | 5 | 90273  | 0.572996886 |
| 7 | 5 | 1089   | 0.596292481 |
| 7 | 5 | 375298 | 0.542211278 |
| 7 | 3 | 1071   | 0.815106238 |
| 7 | 4 | 79094  | 0.326353172 |
| 7 | 2 | 1118   | 0.943852134 |
| 7 | 7 | 1123   | 0.706228729 |
| 7 | 6 | 8646   | 0.807038068 |
| 7 | 6 | 91851  | 0.885098022 |
| 7 | 2 | 8973   | 0.946718865 |
| 7 | 1 | 166012 | 0.794726252 |
| 7 | 3 | 9435   | 0.824879833 |
| 7 | 5 | 4261   | 0.536050956 |
| 7 | 4 | 8483   | 0.892589698 |
| 7 | 5 | 1154   | 0.581387372 |
| 7 | 4 | 23529  | 0.838148931 |
| 7 | 5 | 10462  | 0.585432744 |
| 7 | 1 | 6320   | 0.796573448 |
| 7 | 2 | 160364 | 0.334839672 |
| 7 | 3 | 161198 | 0.831441352 |
| 7 | 2 | 51267  | 0.947143816 |
| 7 | 3 | 7123   | 0.619946406 |
| 7 | 1 | 50856  | 0.800946381 |
| 7 | 2 | 338339 | 0.914423709 |
| 7 | 2 | 26253  | 0.859091763 |
| 7 | 5 | 23601  | 0.590577948 |
| 7 | 2 | 283420 | 0.390651932 |
| 7 | 3 | 1193   | 0.311661934 |
| 7 | 7 | 9022   | 0.604924711 |
| 7 | 1 | 53405  | 0.616946845 |
| 7 | 6 | 9575   | 0.905663735 |
| 7 | 5 | 1212   | 0.394545494 |
| 7 | 7 | 1215   | 0.620264942 |
| 7 | 5 | 1240   | 0.488121259 |
| 7 | 2 | 84518  | 0.364115944 |

|   |   |        |             |
|---|---|--------|-------------|
| 7 | 2 | 1269   | 0.94600448  |
| 7 | 6 | 1270   | 0.892141412 |
| 7 | 6 | 1271   | 0.889046157 |
| 7 | 4 | 1300   | 0.885801543 |
| 7 | 4 | 1301   | 0.890312825 |
| 7 | 4 | 1303   | 0.88615689  |
| 7 | 4 | 7373   | 0.895684478 |
| 7 | 3 | 1306   | 0.548338178 |
| 7 | 3 | 80781  | 0.822109467 |
| 7 | 4 | 1277   | 0.822761512 |
| 7 | 4 | 1278   | 0.791666999 |
| 7 | 4 | 1281   | 0.894412334 |
| 7 | 3 | 1282   | 0.824764817 |
| 7 | 3 | 1284   | 0.832462264 |
| 7 | 4 | 1289   | 0.891716657 |
| 7 | 6 | 1290   | 0.831192489 |
| 7 | 3 | 50509  | 0.818854567 |
| 7 | 4 | 1291   | 0.896293441 |
| 7 | 4 | 1292   | 0.892986442 |
| 7 | 4 | 1293   | 0.893436222 |
| 7 | 4 | 1295   | 0.890615293 |
| 7 | 1 | 81035  | 0.336439731 |
| 7 | 2 | 10699  | 0.946418824 |
| 7 | 5 | 11151  | 0.612101657 |
| 7 | 5 | 23406  | 0.578432805 |
| 7 | 4 | 1359   | 0.871777679 |
| 7 | 2 | 57699  | 0.923082717 |
| 7 | 5 | 54504  | 0.60250803  |
| 7 | 7 | 8532   | 0.571719401 |
| 7 | 2 | 1378   | 0.948128631 |
| 7 | 2 | 1380   | 0.948810756 |
| 7 | 6 | 1385   | 0.892985602 |
| 7 | 1 | 90993  | 0.6907029   |
| 7 | 6 | 1389   | 0.50664386  |
| 7 | 4 | 83716  | 0.891013689 |
| 7 | 2 | 64109  | 0.952090177 |
| 7 | 5 | 56253  | 0.27266881  |
| 7 | 5 | 1414   | 0.568164992 |
| 7 | 1 | 1435   | 0.686713414 |
| 7 | 1 | 1436   | 0.794399545 |
| 7 | 2 | 1438   | 0.944188745 |
| 7 | 1 | 1439   | 0.63546689  |
| 7 | 2 | 1440   | 0.912919744 |
| 7 | 5 | 1441   | 0.547861756 |
| 7 | 2 | 114784 | 0.609253792 |
| 7 | 4 | 8530   | 0.583505322 |
| 7 | 4 | 1489   | 0.703191702 |
| 7 | 4 | 1490   | 0.528615985 |
| 7 | 7 | 115908 | 0.402048523 |
| 7 | 5 | 1493   | 0.536232933 |
| 7 | 1 | 1508   | 0.471880168 |
| 7 | 2 | 1510   | 0.948798006 |

|   |   |        |             |
|---|---|--------|-------------|
| 7 | 3 | 1511   | 0.445555766 |
| 7 | 1 | 1513   | 0.754670889 |
| 7 | 7 | 1514   | 0.69625549  |
| 7 | 6 | 1519   | 0.774996236 |
| 7 | 5 | 1520   | 0.572006118 |
| 7 | 5 | 1521   | 0.445683074 |
| 7 | 1 | 1522   | 0.79769677  |
| 7 | 2 | 83992  | 0.950490122 |
| 7 | 5 | 6376   | 0.332148898 |
| 7 | 5 | 1524   | 0.527530634 |
| 7 | 5 | 3627   | 0.484371858 |
| 7 | 5 | 6373   | 0.522165122 |
| 7 | 4 | 6387   | 0.311234746 |
| 7 | 5 | 2919   | 0.532752246 |
| 7 | 5 | 10563  | 0.476483976 |
| 7 | 5 | 58191  | 0.592095066 |
| 7 | 5 | 2920   | 0.5482865   |
| 7 | 5 | 2921   | 0.560163908 |
| 7 | 1 | 6374   | 0.738446651 |
| 7 | 5 | 6372   | 0.292715055 |
| 7 | 5 | 4283   | 0.524279998 |
| 7 | 5 | 2833   | 0.548485914 |
| 7 | 3 | 7852   | 0.71680577  |
| 7 | 5 | 10663  | 0.533400596 |
| 7 | 5 | 80231  | 0.594571778 |
| 7 | 3 | 79742  | 0.838530201 |
| 7 | 1 | 1535   | 0.489801649 |
| 7 | 5 | 1536   | 0.593071924 |
| 7 | 2 | 26999  | 0.94767441  |
| 7 | 6 | 1545   | 0.736597925 |
| 7 | 4 | 1593   | 0.890632621 |
| 7 | 2 | 10800  | 0.9430175   |
| 7 | 2 | 57105  | 0.86420194  |
| 7 | 6 | 23500  | 0.877697958 |
| 7 | 4 | 1601   | 0.813012726 |
| 7 | 4 | 51339  | 0.707206285 |
| 7 | 2 | 1621   | 0.907755697 |
| 7 | 6 | 285761 | 0.888835241 |
| 7 | 6 | 8642   | 0.5333816   |
| 7 | 4 | 1634   | 0.891611324 |
| 7 | 6 | 84301  | 0.893278428 |
| 7 | 6 | 4921   | 0.791385529 |
| 7 | 7 | 23586  | 0.691705027 |
| 7 | 5 | 79958  | 0.532359779 |
| 7 | 2 | 27147  | 0.714761153 |
| 7 | 2 | 91319  | 0.882758783 |
| 7 | 1 | 115817 | 0.386581275 |
| 7 | 1 | 10170  | 0.785202476 |
| 7 | 6 | 85458  | 0.906119944 |
| 7 | 4 | 27123  | 0.635653591 |
| 7 | 6 | 10395  | 0.842787465 |
| 7 | 3 | 54567  | 0.828632176 |



|   |   |        |             |
|---|---|--------|-------------|
| 7 | 6 | 23312  | 0.889397607 |
| 7 | 2 | 1769   | 0.944862874 |
| 7 | 2 | 85479  | 0.943313115 |
| 7 | 6 | 55619  | 0.654301883 |
| 7 | 1 | 139818 | 0.547440304 |
| 7 | 5 | 1794   | 0.589894853 |
| 7 | 6 | 9732   | 0.796694541 |
| 7 | 5 | 81704  | 0.49424527  |
| 7 | 7 | 1796   | 0.621774266 |
| 7 | 5 | 9046   | 0.59630907  |
| 7 | 1 | 79930  | 0.485818876 |
| 7 | 6 | 55816  | 0.567341777 |
| 7 | 2 | 220164 | 0.782427782 |
| 7 | 3 | 1800   | 0.476909208 |
| 7 | 5 | 64174  | 0.570801288 |
| 7 | 6 | 54878  | 0.884169264 |
| 7 | 4 | 1805   | 0.816443211 |
| 7 | 2 | 1823   | 0.945651832 |
| 7 | 2 | 1828   | 0.944589761 |
| 7 | 6 | 1832   | 0.839475548 |
| 7 | 6 | 80824  | 0.89348795  |
| 7 | 1 | 1846   | 0.795553802 |
| 7 | 3 | 8291   | 0.821333872 |
| 7 | 6 | 1875   | 0.838674665 |
| 7 | 2 | 64641  | 0.942397956 |
| 7 | 5 | 10148  | 0.594912234 |
| 7 | 4 | 1842   | 0.894064543 |
| 7 | 2 | 1896   | 0.945766993 |
| 7 | 2 | 60401  | 0.944913719 |
| 7 | 2 | 10913  | 0.944651808 |
| 7 | 4 | 1909   | 0.643733084 |
| 7 | 3 | 1910   | 0.669349723 |
| 7 | 3 | 30008  | 0.455835414 |
| 7 | 4 | 9343   | 0.705408995 |
| 7 | 2 | 1950   | 0.953133306 |
| 7 | 4 | 1956   | 0.892532705 |
| 7 | 4 | 30846  | 0.889330354 |
| 7 | 3 | 51705  | 0.595985281 |
| 7 | 4 | 11117  | 0.735904371 |
| 7 | 1 | 84034  | 0.801277329 |
| 7 | 1 | 2022   | 0.548661031 |
| 7 | 6 | 2027   | 0.383421355 |
| 7 | 4 | 2028   | 0.89045809  |
| 7 | 7 | 5168   | 0.643535771 |
| 7 | 2 | 5169   | 0.944558541 |
| 7 | 6 | 22875  | 0.649102925 |
| 7 | 3 | 953    | 0.800368708 |
| 7 | 5 | 8320   | 0.532144863 |
| 7 | 6 | 2033   | 0.894313214 |
| 7 | 2 | 2056   | 0.948476607 |
| 7 | 3 | 2057   | 0.447622626 |
| 7 | 6 | 2059   | 0.840099244 |

|   |   |        |             |
|---|---|--------|-------------|
| 7 | 2 | 54869  | 0.923943187 |
| 7 | 7 | 94240  | 0.676285395 |
| 7 | 2 | 2081   | 0.902870429 |
| 7 | 3 | 90952  | 0.831854534 |
| 7 | 6 | 2113   | 0.828371989 |
| 7 | 6 | 2117   | 0.8933759   |
| 7 | 7 | 51513  | 0.658900299 |
| 7 | 1 | 2123   | 0.736678383 |
| 7 | 1 | 2124   | 0.799798495 |
| 7 | 2 | 2125   | 0.94130275  |
| 7 | 4 | 2162   | 0.463261617 |
| 7 | 3 | 2149   | 0.707647778 |
| 7 | 1 | 2153   | 0.793959571 |
| 7 | 6 | 2170   | 0.878318961 |
| 7 | 5 | 54491  | 0.532446294 |
| 7 | 2 | 11170  | 0.947987986 |
| 7 | 6 | 25817  | 0.530341905 |
| 7 | 1 | 115572 | 0.468859996 |
| 7 | 4 | 54855  | 0.874317335 |
| 7 | 6 | 81553  | 0.776462353 |
| 7 | 5 | 286336 | 0.501945136 |
| 7 | 2 | 84985  | 0.948172847 |
| 7 | 2 | 339145 | 0.945899585 |
| 7 | 4 | 2191   | 0.906899115 |
| 7 | 4 | 355    | 0.889638327 |
| 7 | 5 | 356    | 0.532899417 |
| 7 | 6 | 79633  | 0.869383105 |
| 7 | 3 | 2199   | 0.526973504 |
| 7 | 4 | 10516  | 0.890046896 |
| 7 | 4 | 2200   | 0.885372313 |
| 7 | 5 | 2203   | 0.585243585 |
| 7 | 4 | 23194  | 0.893332073 |
| 7 | 7 | 26270  | 0.689202806 |
| 7 | 2 | 2204   | 0.945083392 |
| 7 | 7 | 2205   | 0.584187805 |
| 7 | 1 | 2207   | 0.497376138 |
| 7 | 1 | 2208   | 0.79155932  |
| 7 | 5 | 8857   | 0.571680138 |
| 7 | 5 | 2209   | 0.588802533 |
| 7 | 5 | 2212   | 0.565740882 |
| 7 | 5 | 2213   | 0.586435947 |
| 7 | 5 | 2214   | 0.581380008 |
| 7 | 5 | 2215   | 0.593583264 |
| 7 | 5 | 2217   | 0.439882887 |
| 7 | 5 | 2219   | 0.583210675 |
| 7 | 2 | 115350 | 0.942687478 |
| 7 | 2 | 79368  | 0.943352665 |
| 7 | 2 | 115352 | 0.94576436  |
| 7 | 2 | 83416  | 0.955355792 |
| 7 | 5 | 343413 | 0.536294239 |
| 7 | 5 | 221472 | 0.576652248 |
| 7 | 1 | 89846  | 0.786245831 |

|   |   |        |             |
|---|---|--------|-------------|
| 7 | 3 | 152273 | 0.824016482 |
| 7 | 2 | 2259   | 0.944656864 |
| 7 | 4 | 2252   | 0.692794165 |
| 7 | 5 | 10875  | 0.57453755  |
| 7 | 5 | 2268   | 0.420764513 |
| 7 | 3 | 9457   | 0.617106134 |
| 7 | 1 | 51303  | 0.518653748 |
| 7 | 6 | 51661  | 0.655319169 |
| 7 | 3 | 2313   | 0.598981895 |
| 7 | 3 | 2321   | 0.817599267 |
| 7 | 2 | 2322   | 0.941858401 |
| 7 | 7 | 2323   | 0.597349183 |
| 7 | 3 | 2324   | 0.835400314 |
| 7 | 5 | 752    | 0.595608743 |
| 7 | 3 | 91010  | 0.814731652 |
| 7 | 4 | 2331   | 0.876815056 |
| 7 | 3 | 2335   | 0.368237735 |
| 7 | 5 | 23048  | 0.486327326 |
| 7 | 4 | 84624  | 0.879625438 |
| 7 | 1 | 2350   | 0.60706039  |
| 7 | 5 | 50943  | 0.540586817 |
| 7 | 5 | 2357   | 0.592391156 |
| 7 | 6 | 2487   | 0.890883563 |
| 7 | 7 | 6624   | 0.506935724 |
| 7 | 6 | 11167  | 0.819432721 |
| 7 | 2 | 10272  | 0.298511288 |
| 7 | 5 | 2517   | 0.59732061  |
| 7 | 5 | 2529   | 0.595222115 |
| 7 | 6 | 2534   | 0.61330316  |
| 7 | 3 | 8322   | 0.548943471 |
| 7 | 2 | 139716 | 0.945187198 |
| 7 | 4 | 130589 | 0.404368209 |
| 7 | 5 | 8522   | 0.588469127 |
| 7 | 2 | 2623   | 0.945965732 |
| 7 | 3 | 2624   | 0.760521846 |
| 7 | 5 | 2625   | 0.321254825 |
| 7 | 6 | 2628   | 0.82906897  |
| 7 | 1 | 26301  | 0.787002914 |
| 7 | 7 | 2633   | 0.601539022 |
| 7 | 1 | 2634   | 0.437975047 |
| 7 | 5 | 115361 | 0.524979783 |
| 7 | 5 | 115362 | 0.351013489 |
| 7 | 4 | 8200   | 0.850044441 |
| 7 | 5 | 2672   | 0.544951864 |
| 7 | 2 | 2676   | 0.945686562 |
| 7 | 1 | 2678   | 0.799127103 |
| 7 | 6 | 2690   | 0.852743924 |
| 7 | 3 | 51738  | 0.349253029 |
| 7 | 5 | 170575 | 0.578733728 |
| 7 | 5 | 26157  | 0.477946323 |
| 7 | 5 | 55303  | 0.57713821  |
| 7 | 5 | 55340  | 0.584896355 |

|   |   |        |             |
|---|---|--------|-------------|
| 7 | 3 | 474344 | 0.557465474 |
| 7 | 5 | 168537 | 0.567918799 |
| 7 | 3 | 155038 | 0.638451674 |
| 7 | 3 | 126326 | 0.823199612 |
| 7 | 6 | 9815   | 0.890484651 |
| 7 | 3 | 2701   | 0.817274095 |
| 7 | 3 | 2702   | 0.826217078 |
| 7 | 4 | 2706   | 0.893188781 |
| 7 | 2 | 2707   | 0.948371021 |
| 7 | 6 | 2709   | 0.878755773 |
| 7 | 4 | 169792 | 0.797024521 |
| 7 | 1 | 2745   | 0.800807782 |
| 7 | 4 | 83468  | 0.892430972 |
| 7 | 1 | 9535   | 0.643668441 |
| 7 | 1 | 51291  | 0.570047902 |
| 7 | 7 | 2766   | 0.649965067 |
| 7 | 1 | 2769   | 0.661380595 |
| 7 | 1 | 2771   | 0.707911439 |
| 7 | 3 | 2791   | 0.616052821 |
| 7 | 3 | 54331  | 0.531245623 |
| 7 | 2 | 2788   | 0.848982933 |
| 7 | 5 | 2793   | 0.53698907  |
| 7 | 5 | 10578  | 0.536987433 |
| 7 | 1 | 2799   | 0.743764213 |
| 7 | 5 | 151306 | 0.598120485 |
| 7 | 2 | 2262   | 0.947526853 |
| 7 | 6 | 10082  | 0.350688019 |
| 7 | 5 | 29933  | 0.488917055 |
| 7 | 1 | 7107   | 0.802825475 |
| 7 | 2 | 353345 | 0.937095931 |
| 7 | 6 | 80045  | 0.564080079 |
| 7 | 7 | 29909  | 0.320282621 |
| 7 | 5 | 84636  | 0.535353702 |
| 7 | 5 | 2841   | 0.541205104 |
| 7 | 5 | 2848   | 0.534487766 |
| 7 | 5 | 2857   | 0.529167278 |
| 7 | 2 | 2859   | 0.948199905 |
| 7 | 3 | 2828   | 0.825974651 |
| 7 | 5 | 9290   | 0.570029645 |
| 7 | 5 | 8477   | 0.59390797  |
| 7 | 2 | 27201  | 0.513620365 |
| 7 | 2 | 27197  | 0.948098371 |
| 7 | 5 | 53831  | 0.592788724 |
| 7 | 1 | 63940  | 0.573407598 |
| 7 | 3 | 10750  | 0.827060008 |
| 7 | 5 | 9402   | 0.534107613 |
| 7 | 4 | 26585  | 0.877650814 |
| 7 | 2 | 116443 | 0.796910474 |
| 7 | 6 | 2957   | 0.882797043 |
| 7 | 6 | 2977   | 0.890032716 |
| 7 | 6 | 2982   | 0.686985936 |
| 7 | 5 | 2995   | 0.579153931 |

|   |   |        |             |
|---|---|--------|-------------|
| 7 | 5 | 3001   | 0.512063832 |
| 7 | 5 | 3002   | 0.469220227 |
| 7 | 5 | 2999   | 0.531598634 |
| 7 | 5 | 3003   | 0.528225973 |
| 7 | 5 | 3004   | 0.541347877 |
| 7 | 5 | 57817  | 0.534572443 |
| 7 | 4 | 145864 | 0.890864064 |
| 7 | 2 | 26762  | 0.936471848 |
| 7 | 5 | 84868  | 0.480939509 |
| 7 | 5 | 3055   | 0.43047298  |
| 7 | 5 | 3059   | 0.590420945 |
| 7 | 7 | 10866  | 0.362808583 |
| 7 | 5 | 10870  | 0.584807913 |
| 7 | 5 | 3067   | 0.280666855 |
| 7 | 3 | 57520  | 0.725717178 |
| 7 | 4 | 9843   | 0.881498624 |
| 7 | 7 | 55008  | 0.708952376 |
| 7 | 7 | 9709   | 0.676473585 |
| 7 | 3 | 26508  | 0.826259625 |
| 7 | 7 | 3077   | 0.694941355 |
| 7 | 4 | 3082   | 0.888057381 |
| 7 | 4 | 3090   | 0.890226331 |
| 7 | 6 | 10114  | 0.901146043 |
| 7 | 7 | 3012   | 0.432694709 |
| 7 | 6 | 8969   | 0.901967951 |
| 7 | 5 | 8336   | 0.308614228 |
| 7 | 7 | 8357   | 0.348875793 |
| 7 | 5 | 3101   | 0.528815806 |
| 7 | 5 | 3105   | 0.555821226 |
| 7 | 5 | 3106   | 0.4039545   |
| 7 | 7 | 3107   | 0.653215367 |
| 7 | 5 | 3108   | 0.578493687 |
| 7 | 5 | 3109   | 0.580225729 |
| 7 | 5 | 3111   | 0.542342945 |
| 7 | 5 | 3112   | 0.392786472 |
| 7 | 5 | 3113   | 0.582532272 |
| 7 | 5 | 3115   | 0.585605555 |
| 7 | 5 | 3116   | 0.520260423 |
| 7 | 5 | 3117   | 0.593622423 |
| 7 | 5 | 3118   | 0.520532355 |
| 7 | 5 | 3119   | 0.589389487 |
| 7 | 5 | 3120   | 0.571696437 |
| 7 | 5 | 3122   | 0.598824305 |
| 7 | 5 | 3123   | 0.578673828 |
| 7 | 5 | 3127   | 0.58429697  |
| 7 | 5 | 3128   | 0.58273486  |
| 7 | 5 | 3133   | 0.612649148 |
| 7 | 5 | 3134   | 0.552448456 |
| 7 | 5 | 3135   | 0.401198806 |
| 7 | 7 | 3136   | 0.642158004 |
| 7 | 4 | 83872  | 0.896553323 |
| 7 | 7 | 3176   | 0.629226695 |

|   |   |        |             |
|---|---|--------|-------------|
| 7 | 1 | 3274   | 0.671530947 |
| 7 | 3 | 9957   | 0.401211145 |
| 7 | 1 | 9956   | 0.611790213 |
| 7 | 7 | 3290   | 0.653276366 |
| 7 | 2 | 84941  | 0.314626466 |
| 7 | 6 | 3320   | 0.888642918 |
| 7 | 6 | 3326   | 0.889371052 |
| 7 | 4 | 116835 | 0.888323553 |
| 7 | 5 | 3303   | 0.412153891 |
| 7 | 2 | 3304   | 0.737748632 |
| 7 | 5 | 3305   | 0.262927687 |
| 7 | 6 | 3306   | 0.720785105 |
| 7 | 6 | 3308   | 0.887692581 |
| 7 | 6 | 3309   | 0.871677075 |
| 7 | 5 | 3310   | 0.377000155 |
| 7 | 6 | 3312   | 0.896387893 |
| 7 | 4 | 3356   | 0.894823432 |
| 7 | 1 | 94031  | 0.742890354 |
| 7 | 2 | 203100 | 0.945512523 |
| 7 | 2 | 54768  | 0.945278826 |
| 7 | 1 | 3383   | 0.49492004  |
| 7 | 3 | 3384   | 0.830119747 |
| 7 | 1 | 3385   | 0.408810038 |
| 7 | 6 | 22858  | 0.900278172 |
| 7 | 5 | 29851  | 0.53502659  |
| 7 | 4 | 23308  | 0.352178029 |
| 7 | 7 | 3429   | 0.722874607 |
| 7 | 1 | 10437  | 0.606782495 |
| 7 | 7 | 3430   | 0.709699709 |
| 7 | 7 | 10561  | 0.672031505 |
| 7 | 7 | 10964  | 0.745882981 |
| 7 | 7 | 64135  | 0.75245665  |
| 7 | 7 | 3433   | 0.739864246 |
| 7 | 7 | 3437   | 0.722762183 |
| 7 | 6 | 24138  | 0.814564887 |
| 7 | 7 | 8519   | 0.715808551 |
| 7 | 7 | 10410  | 0.691326555 |
| 7 | 6 | 3454   | 0.887062554 |
| 7 | 7 | 3455   | 0.615969778 |
| 7 | 5 | 3458   | 0.545994493 |
| 7 | 6 | 3459   | 0.772001976 |
| 7 | 7 | 3460   | 0.676433195 |
| 7 | 2 | 3467   | 0.945406885 |
| 7 | 3 | 3479   | 0.569203972 |
| 7 | 4 | 285313 | 0.887436528 |
| 7 | 1 | 84966  | 0.800514953 |
| 7 | 5 | 10261  | 0.543780169 |
| 7 | 5 | 3586   | 0.588790099 |
| 7 | 5 | 3587   | 0.578454549 |
| 7 | 7 | 3588   | 0.693438589 |
| 7 | 2 | 3589   | 0.800641451 |
| 7 | 6 | 3590   | 0.616193259 |

|   |   |        |             |
|---|---|--------|-------------|
| 7 | 7 | 3592   | 0.536073909 |
| 7 | 2 | 3593   | 0.943851699 |
| 7 | 5 | 3594   | 0.538501267 |
| 7 | 2 | 3595   | 0.924726281 |
| 7 | 2 | 3596   | 0.699617766 |
| 7 | 4 | 3597   | 0.804367219 |
| 7 | 5 | 3600   | 0.283007536 |
| 7 | 7 | 3601   | 0.669326816 |
| 7 | 4 | 3603   | 0.243547636 |
| 7 | 6 | 27190  | 0.895025009 |
| 7 | 6 | 55540  | 0.889715425 |
| 7 | 5 | 3606   | 0.540860188 |
| 7 | 7 | 10068  | 0.649401665 |
| 7 | 2 | 8809   | 0.779502044 |
| 7 | 2 | 8807   | 0.790139663 |
| 7 | 2 | 29949  | 0.94932333  |
| 7 | 2 | 3552   | 0.901761474 |
| 7 | 5 | 3553   | 0.578678688 |
| 7 | 4 | 3554   | 0.760778878 |
| 7 | 3 | 7850   | 0.664230472 |
| 7 | 2 | 3556   | 0.946488649 |
| 7 | 2 | 9173   | 0.946746779 |
| 7 | 5 | 3557   | 0.549546734 |
| 7 | 2 | 53832  | 0.861799768 |
| 7 | 1 | 50615  | 0.789456712 |
| 7 | 7 | 58985  | 0.702325318 |
| 7 | 5 | 51561  | 0.218858805 |
| 7 | 2 | 149233 | 0.868061205 |
| 7 | 2 | 11009  | 0.469909411 |
| 7 | 5 | 246778 | 0.564240455 |
| 7 | 5 | 3559   | 0.562452555 |
| 7 | 5 | 3560   | 0.500838839 |
| 7 | 5 | 3561   | 0.527828517 |
| 7 | 5 | 9235   | 0.54840227  |
| 7 | 3 | 3563   | 0.842464575 |
| 7 | 2 | 3565   | 0.946031886 |
| 7 | 7 | 259307 | 0.699502121 |
| 7 | 1 | 3566   | 0.461911457 |
| 7 | 2 | 3568   | 0.946432152 |
| 7 | 5 | 3569   | 0.349459871 |
| 7 | 6 | 3570   | 0.85208103  |
| 7 | 6 | 3572   | 0.870655803 |
| 7 | 2 | 3574   | 0.768727083 |
| 7 | 2 | 3575   | 0.682717685 |
| 7 | 5 | 3581   | 0.321341469 |
| 7 | 4 | 3624   | 0.835182039 |
| 7 | 3 | 3625   | 0.799711447 |
| 7 | 2 | 3626   | 0.946037801 |
| 7 | 4 | 83729  | 0.890385294 |
| 7 | 2 | 11185  | 0.949064155 |
| 7 | 1 | 3635   | 0.652670148 |
| 7 | 2 | 10788  | 0.657150656 |

|   |   |        |             |
|---|---|--------|-------------|
| 7 | 7 | 3659   | 0.429474611 |
| 7 | 5 | 3662   | 0.294869997 |
| 7 | 7 | 3665   | 0.719848656 |
| 7 | 5 | 3394   | 0.572749415 |
| 7 | 7 | 3669   | 0.661949994 |
| 7 | 4 | 3671   | 0.888679173 |
| 7 | 4 | 22801  | 0.891014039 |
| 7 | 3 | 3672   | 0.833505914 |
| 7 | 2 | 3674   | 0.948187055 |
| 7 | 6 | 3676   | 0.659186674 |
| 7 | 4 | 3678   | 0.880889074 |
| 7 | 6 | 8516   | 0.842975027 |
| 7 | 3 | 3680   | 0.612427227 |
| 7 | 2 | 3681   | 0.946699151 |
| 7 | 5 | 3683   | 0.52873831  |
| 7 | 5 | 3684   | 0.576611448 |
| 7 | 1 | 3687   | 0.790121019 |
| 7 | 6 | 3688   | 0.785775937 |
| 7 | 5 | 3689   | 0.576368782 |
| 7 | 1 | 3690   | 0.786741383 |
| 7 | 5 | 3695   | 0.553006519 |
| 7 | 4 | 9358   | 0.877195053 |
| 7 | 2 | 3702   | 0.90519992  |
| 7 | 3 | 9452   | 0.671013479 |
| 7 | 2 | 3713   | 0.756833445 |
| 7 | 6 | 3717   | 0.7810743   |
| 7 | 5 | 3718   | 0.479353223 |
| 7 | 5 | 152789 | 0.321335949 |
| 7 | 6 | 58494  | 0.885619967 |
| 7 | 6 | 83700  | 0.891831014 |
| 7 | 6 | 133746 | 0.901978813 |
| 7 | 5 | 126306 | 0.245251927 |
| 7 | 3 | 3728   | 0.803592338 |
| 7 | 5 | 3738   | 0.355157757 |
| 7 | 7 | 8514   | 0.470710961 |
| 7 | 2 | 3751   | 0.950762351 |
| 7 | 2 | 23704  | 0.942745511 |
| 7 | 2 | 3757   | 0.768825981 |
| 7 | 2 | 3766   | 0.326245766 |
| 7 | 3 | 3764   | 0.440659844 |
| 7 | 5 | 56659  | 0.508293149 |
| 7 | 2 | 9424   | 0.949858834 |
| 7 | 2 | 3779   | 0.954442637 |
| 7 | 4 | 3782   | 0.745162247 |
| 7 | 1 | 3783   | 0.76668867  |
| 7 | 2 | 343450 | 0.661538753 |
| 7 | 6 | 115207 | 0.86068456  |
| 7 | 3 | 3791   | 0.828800386 |
| 7 | 6 | 57670  | 0.898599509 |
| 7 | 7 | 85449  | 0.594095141 |
| 7 | 2 | 23046  | 0.886842536 |
| 7 | 5 | 3805   | 0.522161153 |



|   |   |        |             |
|---|---|--------|-------------|
| 7 | 5 | 3811   | 0.524011547 |
| 7 | 2 | 3812   | 0.39758859  |
| 7 | 6 | 3815   | 0.695826579 |
| 7 | 6 | 4254   | 0.722056298 |
| 7 | 3 | 9365   | 0.70637158  |
| 7 | 6 | 55175  | 0.885386595 |
| 7 | 6 | 151230 | 0.89562244  |
| 7 | 1 | 89857  | 0.492742361 |
| 7 | 2 | 5650   | 0.944826531 |
| 7 | 5 | 3820   | 0.539920953 |
| 7 | 2 | 3821   | 0.943974807 |
| 7 | 4 | 3822   | 0.496763565 |
| 7 | 1 | 3823   | 0.796552751 |
| 7 | 5 | 8302   | 0.371903541 |
| 7 | 2 | 3824   | 0.946436466 |
| 7 | 2 | 10219  | 0.919615714 |
| 7 | 2 | 22914  | 0.399516582 |
| 7 | 1 | 8564   | 0.752216399 |
| 7 | 5 | 3848   | 0.434448463 |
| 7 | 4 | 3861   | 0.777986082 |
| 7 | 4 | 3868   | 0.528328429 |
| 7 | 2 | 3853   | 0.768410396 |
| 7 | 7 | 3854   | 0.69090914  |
| 7 | 2 | 3898   | 0.943518663 |
| 7 | 5 | 3902   | 0.568050425 |
| 7 | 5 | 3903   | 0.59385324  |
| 7 | 5 | 3904   | 0.521295034 |
| 7 | 6 | 3908   | 0.847241491 |
| 7 | 3 | 3910   | 0.670647258 |
| 7 | 2 | 3918   | 0.944669628 |
| 7 | 7 | 51056  | 0.686104025 |
| 7 | 1 | 7805   | 0.794974143 |
| 7 | 1 | 27040  | 0.794714242 |
| 7 | 1 | 7462   | 0.797890701 |
| 7 | 6 | 9113   | 0.885069836 |
| 7 | 6 | 26524  | 0.864423819 |
| 7 | 2 | 54900  | 0.466264518 |
| 7 | 5 | 3932   | 0.535868906 |
| 7 | 2 | 414332 | 0.949113407 |
| 7 | 1 | 3936   | 0.769393876 |
| 7 | 5 | 3937   | 0.588101719 |
| 7 | 3 | 9079   | 0.836730037 |
| 7 | 2 | 3952   | 0.915888521 |
| 7 | 1 | 3953   | 0.439214542 |
| 7 | 7 | 3957   | 0.617877332 |
| 7 | 5 | 3965   | 0.584888777 |
| 7 | 4 | 55203  | 0.891051769 |
| 7 | 5 | 5641   | 0.577413013 |
| 7 | 6 | 10184  | 0.863138334 |
| 7 | 1 | 3976   | 0.71764076  |
| 7 | 6 | 3977   | 0.766261485 |
| 7 | 6 | 3980   | 0.897390269 |

|   |   |        |             |
|---|---|--------|-------------|
| 7 | 5 | 11024  | 0.579081968 |
| 7 | 5 | 11027  | 0.579331487 |
| 7 | 2 | 23547  | 0.34991455  |
| 7 | 2 | 353514 | 0.854755814 |
| 7 | 1 | 79168  | 0.516111621 |
| 7 | 5 | 10859  | 0.588572398 |
| 7 | 5 | 10288  | 0.596052199 |
| 7 | 5 | 11025  | 0.587299331 |
| 7 | 1 | 11006  | 0.767242711 |
| 7 | 5 | 10990  | 0.585957802 |
| 7 | 1 | 80774  | 0.468986631 |
| 7 | 5 | 54923  | 0.538495216 |
| 7 | 6 | 3987   | 0.818551615 |
| 7 | 7 | 3988   | 0.609820785 |
| 7 | 3 | 25802  | 0.642988113 |
| 7 | 6 | 22853  | 0.891510231 |
| 7 | 4 | 4017   | 0.892579189 |
| 7 | 7 | 84695  | 0.584481654 |
| 7 | 6 | 4023   | 0.840729064 |
| 7 | 5 | 9404   | 0.586809214 |
| 7 | 6 | 57631  | 0.896281102 |
| 7 | 5 | 4033   | 0.392549146 |
| 7 | 6 | 4040   | 0.885537303 |
| 7 | 4 | 131578 | 0.831731301 |
| 7 | 4 | 10234  | 0.656142673 |
| 7 | 5 | 126364 | 0.582192152 |
| 7 | 4 | 2615   | 0.88932465  |
| 7 | 2 | 4045   | 0.940987141 |
| 7 | 4 | 4046   | 0.896984738 |
| 7 | 5 | 7940   | 0.591261092 |
| 7 | 5 | 4049   | 0.544947752 |
| 7 | 5 | 4050   | 0.569818869 |
| 7 | 4 | 4053   | 0.753380132 |
| 7 | 4 | 4055   | 0.335395207 |
| 7 | 5 | 4056   | 0.553939396 |
| 7 | 4 | 4060   | 0.879996281 |
| 7 | 5 | 9450   | 0.573093682 |
| 7 | 2 | 4063   | 0.398487212 |
| 7 | 5 | 23643  | 0.581204646 |
| 7 | 5 | 4066   | 0.572850134 |
| 7 | 7 | 4067   | 0.452960795 |
| 7 | 3 | 27076  | 0.588332178 |
| 7 | 2 | 284348 | 0.945107588 |
| 7 | 5 | 4069   | 0.525256204 |
| 7 | 6 | 54551  | 0.689787639 |
| 7 | 4 | 4121   | 0.698484631 |
| 7 | 6 | 10905  | 0.862263341 |
| 7 | 2 | 57134  | 0.815902557 |
| 7 | 5 | 4129   | 0.250086836 |
| 7 | 2 | 440738 | 0.942418051 |
| 7 | 6 | 10746  | 0.897423175 |
| 7 | 2 | 11184  | 0.426152319 |

|   |   |        |             |
|---|---|--------|-------------|
| 7 | 5 | 8685   | 0.55777487  |
| 7 | 6 | 55796  | 0.863642562 |
| 7 | 2 | 255231 | 0.922699094 |
| 7 | 3 | 1E+08  | 0.615284124 |
| 7 | 6 | 4208   | 0.888140139 |
| 7 | 3 | 4223   | 0.585257739 |
| 7 | 6 | 4233   | 0.89202648  |
| 7 | 6 | 4238   | 0.880054806 |
| 7 | 4 | 4239   | 0.888082399 |
| 7 | 5 | 4242   | 0.605696066 |
| 7 | 2 | 83552  | 0.946588306 |
| 7 | 1 | 84179  | 0.795403034 |
| 7 | 1 | 11320  | 0.651043113 |
| 7 | 6 | 4249   | 0.859942332 |
| 7 | 4 | 4256   | 0.888907505 |
| 7 | 4 | 9645   | 0.880979212 |
| 7 | 6 | 4277   | 0.681893764 |
| 7 | 2 | 4286   | 0.515017727 |
| 7 | 1 | 79083  | 0.795260372 |
| 7 | 2 | 4321   | 0.943993999 |
| 7 | 4 | 4312   | 0.889589314 |
| 7 | 4 | 4323   | 0.892550843 |
| 7 | 6 | 4325   | 0.751606962 |
| 7 | 4 | 4313   | 0.895324849 |
| 7 | 2 | 64386  | 0.768347176 |
| 7 | 7 | 4314   | 0.563660566 |
| 7 | 1 | 4318   | 0.766710967 |
| 7 | 3 | 22915  | 0.81972787  |
| 7 | 3 | 79812  | 0.817692159 |
| 7 | 5 | 4332   | 0.589085604 |
| 7 | 5 | 219972 | 0.579060415 |
| 7 | 2 | 4352   | 0.941603193 |
| 7 | 5 | 4354   | 0.432631678 |
| 7 | 7 | 3140   | 0.71153015  |
| 7 | 4 | 116535 | 0.891693115 |
| 7 | 5 | 83876  | 0.516361828 |
| 7 | 7 | 51264  | 0.548844349 |
| 7 | 5 | 128308 | 0.449546799 |
| 7 | 1 | 6183   | 0.486379978 |
| 7 | 7 | 54460  | 0.678662009 |
| 7 | 2 | 10335  | 0.499205279 |
| 7 | 5 | 931    | 0.508060791 |
| 7 | 2 | 2206   | 0.945879151 |
| 7 | 5 | 51338  | 0.586789671 |
| 7 | 5 | 64231  | 0.570145459 |
| 7 | 5 | 58475  | 0.509655482 |
| 7 | 5 | 4481   | 0.581202526 |
| 7 | 6 | 253827 | 0.831285586 |
| 7 | 4 | 9961   | 0.816267089 |
| 7 | 7 | 4599   | 0.714175889 |
| 7 | 6 | 4084   | 0.896379133 |
| 7 | 1 | 54587  | 0.521436222 |

|   |   |        |             |
|---|---|--------|-------------|
| 7 | 3 | 80177  | 0.856677235 |
| 7 | 2 | 50804  | 0.943800424 |
| 7 | 5 | 4542   | 0.572973917 |
| 7 | 5 | 64005  | 0.585172139 |
| 7 | 5 | 4647   | 0.589725965 |
| 7 | 6 | 4649   | 0.824874624 |
| 7 | 6 | 55728  | 0.878250935 |
| 7 | 7 | 10004  | 0.571755234 |
| 7 | 4 | 4675   | 0.898511177 |
| 7 | 5 | 256236 | 0.535900919 |
| 7 | 6 | 26960  | 0.877704999 |
| 7 | 2 | 65065  | 0.797494103 |
| 7 | 5 | 653361 | 0.59736515  |
| 7 | 5 | 4688   | 0.574642934 |
| 7 | 5 | 4689   | 0.566080106 |
| 7 | 6 | 10499  | 0.900531271 |
| 7 | 2 | 9437   | 0.94429709  |
| 7 | 5 | 259197 | 0.534191479 |
| 7 | 2 | 257194 | 0.948618924 |
| 7 | 5 | 150372 | 0.584292621 |
| 7 | 4 | 4773   | 0.825722714 |
| 7 | 1 | 4791   | 0.708068593 |
| 7 | 1 | 4794   | 0.797022491 |
| 7 | 6 | 4800   | 0.888792216 |
| 7 | 6 | 4801   | 0.894962836 |
| 7 | 6 | 4802   | 0.894445536 |
| 7 | 6 | 374354 | 0.899393403 |
| 7 | 4 | 22795  | 0.885273606 |
| 7 | 5 | 4818   | 0.54694945  |
| 7 | 7 | 9111   | 0.75041985  |
| 7 | 3 | 4855   | 0.829696225 |
| 7 | 3 | 4858   | 0.582536781 |
| 7 | 3 | 50507  | 0.556745414 |
| 7 | 5 | 10062  | 0.578591866 |
| 7 | 2 | 2494   | 0.943375239 |
| 7 | 3 | 8829   | 0.815798306 |
| 7 | 2 | 9369   | 0.945987566 |
| 7 | 4 | 4907   | 0.869540052 |
| 7 | 5 | 84628  | 0.505421291 |
| 7 | 4 | 4914   | 0.89289562  |
| 7 | 7 | 4938   | 0.722456889 |
| 7 | 7 | 4939   | 0.73527523  |
| 7 | 7 | 4940   | 0.706647371 |
| 7 | 7 | 8638   | 0.712142493 |
| 7 | 6 | 79627  | 0.817116436 |
| 7 | 4 | 4969   | 0.889882629 |
| 7 | 7 | 283298 | 0.596638359 |
| 7 | 4 | 25903  | 0.889645431 |
| 7 | 4 | 56944  | 0.82542828  |
| 7 | 2 | 4973   | 0.464466895 |
| 7 | 6 | 4958   | 0.726427686 |
| 7 | 1 | 126014 | 0.795262902 |

|   |   |        |             |
|---|---|--------|-------------|
| 7 | 5 | 5008   | 0.591307154 |
| 7 | 4 | 9180   | 0.880726657 |
| 7 | 1 | 146183 | 0.585736393 |
| 7 | 2 | 5017   | 0.941845347 |
| 7 | 2 | 5023   | 0.944030499 |
| 7 | 7 | 5025   | 0.680404787 |
| 7 | 2 | 5026   | 0.379282451 |
| 7 | 7 | 5027   | 0.645710415 |
| 7 | 5 | 27334  | 0.539258464 |
| 7 | 5 | 5032   | 0.500050139 |
| 7 | 3 | 64805  | 0.554038061 |
| 7 | 3 | 53829  | 0.406057782 |
| 7 | 2 | 9934   | 0.445125548 |
| 7 | 3 | 286530 | 0.633576606 |
| 7 | 4 | 283208 | 0.89120735  |
| 7 | 7 | 140886 | 0.479043726 |
| 7 | 7 | 11240  | 0.455378589 |
| 7 | 6 | 5049   | 0.895811704 |
| 7 | 2 | 55824  | 0.752027971 |
| 7 | 6 | 445815 | 0.865887425 |
| 7 | 7 | 64761  | 0.703572751 |
| 7 | 7 | 54625  | 0.706585484 |
| 7 | 2 | 165631 | 0.935891588 |
| 7 | 7 | 83666  | 0.7615102   |
| 7 | 5 | 64098  | 0.587265818 |
| 7 | 6 | 80714  | 0.877130917 |
| 7 | 3 | 51294  | 0.821360421 |
| 7 | 3 | 27253  | 0.627674528 |
| 7 | 6 | 54510  | 0.807521096 |
| 7 | 7 | 26025  | 0.551308103 |
| 7 | 4 | 5118   | 0.678362733 |
| 7 | 5 | 5133   | 0.530888222 |
| 7 | 4 | 80380  | 0.5411817   |
| 7 | 2 | 5136   | 0.946801916 |
| 7 | 2 | 5153   | 0.355018167 |
| 7 | 4 | 5139   | 0.896901953 |
| 7 | 2 | 5140   | 0.941997524 |
| 7 | 3 | 5142   | 0.603392508 |
| 7 | 5 | 5148   | 0.456617809 |
| 7 | 2 | 5154   | 0.946755065 |
| 7 | 3 | 5155   | 0.815605114 |
| 7 | 6 | 56034  | 0.889945561 |
| 7 | 6 | 5156   | 0.5401631   |
| 7 | 4 | 5159   | 0.888775506 |
| 7 | 4 | 5157   | 0.884317788 |
| 7 | 2 | 64714  | 0.777335334 |
| 7 | 1 | 2923   | 0.524407733 |
| 7 | 2 | 10158  | 0.632804651 |
| 7 | 4 | 23024  | 0.890530509 |
| 7 | 2 | 5178   | 0.802678081 |
| 7 | 7 | 5202   | 0.672620627 |
| 7 | 2 | 5239   | 0.927863033 |

|   |   |        |             |
|---|---|--------|-------------|
| 7 | 2 | 221692 | 0.949197868 |
| 7 | 1 | 118788 | 0.775066746 |
| 7 | 1 | 5294   | 0.629657615 |
| 7 | 5 | 23533  | 0.58254719  |
| 7 | 5 | 29992  | 0.59160057  |
| 7 | 5 | 11040  | 0.428383827 |
| 7 | 5 | 9033   | 0.533365461 |
| 7 | 2 | 93035  | 0.946908104 |
| 7 | 5 | 5570   | 0.558431792 |
| 7 | 4 | 11187  | 0.83806765  |
| 7 | 2 | 51365  | 0.906873162 |
| 7 | 2 | 26279  | 0.947215685 |
| 7 | 2 | 123745 | 0.943824484 |
| 7 | 7 | 7941   | 0.567004096 |
| 7 | 3 | 219348 | 0.815930128 |
| 7 | 1 | 5330   | 0.795860459 |
| 7 | 6 | 5332   | 0.88816     |
| 7 | 6 | 5334   | 0.730946539 |
| 7 | 6 | 23228  | 0.809999508 |
| 7 | 5 | 122618 | 0.569772775 |
| 7 | 1 | 26499  | 0.802533259 |
| 7 | 5 | 5341   | 0.506812694 |
| 7 | 7 | 84069  | 0.408355582 |
| 7 | 4 | 51177  | 0.534507244 |
| 7 | 3 | 83483  | 0.828495592 |
| 7 | 4 | 57125  | 0.805952475 |
| 7 | 4 | 10154  | 0.883116552 |
| 7 | 3 | 23129  | 0.76304371  |
| 7 | 7 | 5371   | 0.726771129 |
| 7 | 4 | 5376   | 0.898388638 |
| 7 | 6 | 10687  | 0.656051425 |
| 7 | 1 | 5368   | 0.795796359 |
| 7 | 4 | 127435 | 0.892514404 |
| 7 | 4 | 10631  | 0.891110989 |
| 7 | 2 | 5450   | 0.947491242 |
| 7 | 5 | 5452   | 0.580960284 |
| 7 | 5 | 5473   | 0.525182692 |
| 7 | 1 | 8499   | 0.700100292 |
| 7 | 2 | 5493   | 0.75488899  |
| 7 | 1 | 57460  | 0.751835945 |
| 7 | 1 | 132160 | 0.587723165 |
| 7 | 4 | 10848  | 0.565924096 |
| 7 | 3 | 26051  | 0.824378796 |
| 7 | 2 | 55607  | 0.943938499 |
| 7 | 2 | 84106  | 0.944934444 |
| 7 | 7 | 5549   | 0.49028915  |
| 7 | 1 | 57580  | 0.794864977 |
| 7 | 5 | 5551   | 0.539144884 |
| 7 | 7 | 5553   | 0.666112231 |
| 7 | 6 | 5576   | 0.900977124 |
| 7 | 6 | 5577   | 0.834590527 |
| 7 | 5 | 5588   | 0.336574545 |

|   |   |        |             |
|---|---|--------|-------------|
| 7 | 6 | 5592   | 0.887878578 |
| 7 | 6 | 5617   | 0.842612781 |
| 7 | 2 | 5618   | 0.626505591 |
| 7 | 7 | 10544  | 0.62088054  |
| 7 | 2 | 8842   | 0.949133103 |
| 7 | 4 | 5396   | 0.88529335  |
| 7 | 2 | 83886  | 0.944737186 |
| 7 | 2 | 283659 | 0.741054608 |
| 7 | 1 | 5660   | 0.801438775 |
| 7 | 5 | 5699   | 0.568008431 |
| 7 | 7 | 5696   | 0.655503051 |
| 7 | 7 | 5698   | 0.674655849 |
| 7 | 6 | 5700   | 0.868948511 |
| 7 | 6 | 5701   | 0.844063811 |
| 7 | 7 | 5702   | 0.677987094 |
| 7 | 7 | 5704   | 0.526456188 |
| 7 | 5 | 5705   | 0.290169706 |
| 7 | 6 | 5706   | 0.887322953 |
| 7 | 6 | 5716   | 0.883567437 |
| 7 | 6 | 5717   | 0.892840939 |
| 7 | 7 | 5719   | 0.698925394 |
| 7 | 6 | 10213  | 0.800464162 |
| 7 | 2 | 5707   | 0.77815877  |
| 7 | 6 | 5708   | 0.878342453 |
| 7 | 7 | 5709   | 0.54325723  |
| 7 | 7 | 5710   | 0.569176471 |
| 7 | 6 | 5711   | 0.895555744 |
| 7 | 6 | 9861   | 0.887539614 |
| 7 | 7 | 5713   | 0.705382037 |
| 7 | 7 | 5714   | 0.734635775 |
| 7 | 5 | 5720   | 0.373105331 |
| 7 | 5 | 5721   | 0.419204667 |
| 7 | 6 | 10197  | 0.893801613 |
| 7 | 1 | 9051   | 0.794597271 |
| 7 | 5 | 5724   | 0.57616148  |
| 7 | 5 | 171558 | 0.514650661 |
| 7 | 5 | 5729   | 0.335660561 |
| 7 | 4 | 5730   | 0.375233434 |
| 7 | 4 | 5732   | 0.888855873 |
| 7 | 4 | 5737   | 0.888462134 |
| 7 | 2 | 5739   | 0.945856768 |
| 7 | 6 | 5740   | 0.778252837 |
| 7 | 1 | 26191  | 0.791651842 |
| 7 | 5 | 5777   | 0.534493067 |
| 7 | 1 | 5778   | 0.525223443 |
| 7 | 3 | 5787   | 0.578080048 |
| 7 | 1 | 5788   | 0.471448855 |
| 7 | 5 | 5790   | 0.55116517  |
| 7 | 1 | 5795   | 0.791467957 |
| 7 | 3 | 5797   | 0.82020469  |
| 7 | 1 | 5800   | 0.760859744 |
| 7 | 6 | 5817   | 0.839169846 |

|   |   |        |             |
|---|---|--------|-------------|
| 7 | 2 | 149628 | 0.340776145 |
| 7 | 7 | 23475  | 0.711571958 |
| 7 | 5 | 55647  | 0.571222825 |
| 7 | 4 | 9363   | 0.822786351 |
| 7 | 5 | 326624 | 0.31857278  |
| 7 | 6 | 116442 | 0.302683621 |
| 7 | 6 | 115273 | 0.564527246 |
| 7 | 6 | 51762  | 0.864652785 |
| 7 | 6 | 5887   | 0.898105765 |
| 7 | 2 | 23132  | 0.880276732 |
| 7 | 2 | 135250 | 0.946566794 |
| 7 | 4 | 353091 | 0.844864604 |
| 7 | 2 | 154064 | 0.947783973 |
| 7 | 3 | 10742  | 0.697367094 |
| 7 | 3 | 10268  | 0.544356017 |
| 7 | 6 | 51735  | 0.896100733 |
| 7 | 4 | 5919   | 0.889683578 |
| 7 | 7 | 5920   | 0.684749029 |
| 7 | 3 | 5924   | 0.58835546  |
| 7 | 3 | 10235  | 0.821971938 |
| 7 | 2 | 25780  | 0.943517508 |
| 7 | 1 | 115727 | 0.546662759 |
| 7 | 3 | 51285  | 0.79582706  |
| 7 | 1 | 9770   | 0.529942508 |
| 7 | 6 | 283349 | 0.897002765 |
| 7 | 1 | 83937  | 0.797499121 |
| 7 | 5 | 83593  | 0.506164694 |
| 7 | 2 | 166824 | 0.94455001  |
| 7 | 4 | 83758  | 0.887714371 |
| 7 | 7 | 57333  | 0.473968855 |
| 7 | 5 | 92241  | 0.542935305 |
| 7 | 2 | 145226 | 0.946672847 |
| 7 | 6 | 8434   | 0.75766339  |
| 7 | 6 | 5966   | 0.88693392  |
| 7 | 1 | 5971   | 0.357612324 |
| 7 | 2 | 5649   | 0.941902256 |
| 7 | 5 | 5973   | 0.472186071 |
| 7 | 6 | 5978   | 0.921910118 |
| 7 | 6 | 5993   | 0.888106742 |
| 7 | 5 | 8625   | 0.423314288 |
| 7 | 6 | 5994   | 0.894293811 |
| 7 | 6 | 23179  | 0.799274092 |
| 7 | 4 | 6003   | 0.544385343 |
| 7 | 5 | 5996   | 0.520465535 |
| 7 | 5 | 64407  | 0.567327115 |
| 7 | 3 | 8490   | 0.583600497 |
| 7 | 2 | 399    | 0.942909399 |
| 7 | 4 | 57381  | 0.473484501 |
| 7 | 6 | 55183  | 0.895166966 |
| 7 | 4 | 9610   | 0.89709337  |
| 7 | 1 | 79890  | 0.796655252 |
| 7 | 5 | 6035   | 0.593199212 |



|   |   |        |             |
|---|---|--------|-------------|
| 7 | 5 | 6036   | 0.580837368 |
| 7 | 1 | 6039   | 0.671769817 |
| 7 | 4 | 84659  | 0.665125613 |
| 7 | 2 | 54941  | 0.942207682 |
| 7 | 5 | 115992 | 0.58335057  |
| 7 | 3 | 285671 | 0.786520903 |
| 7 | 3 | 54538  | 0.83836605  |
| 7 | 6 | 9475   | 0.898298367 |
| 7 | 4 | 4919   | 0.882603534 |
| 7 | 7 | 8986   | 0.522211288 |
| 7 | 7 | 91543  | 0.715298932 |
| 7 | 1 | 6252   | 0.752702076 |
| 7 | 7 | 64108  | 0.718938268 |
| 7 | 4 | 862    | 0.788293582 |
| 7 | 2 | 864    | 0.54559973  |
| 7 | 2 | 6283   | 0.938483215 |
| 7 | 4 | 140576 | 0.895037938 |
| 7 | 4 | 6273   | 0.888569427 |
| 7 | 5 | 6279   | 0.589767429 |
| 7 | 5 | 6280   | 0.578221159 |
| 7 | 7 | 6285   | 0.616481295 |
| 7 | 6 | 6297   | 0.883239159 |
| 7 | 3 | 201191 | 0.80446431  |
| 7 | 2 | 154075 | 0.948363025 |
| 7 | 7 | 54809  | 0.711698969 |
| 7 | 7 | 219285 | 0.724394037 |
| 7 | 5 | 25939  | 0.588603235 |
| 7 | 5 | 64092  | 0.594458128 |
| 7 | 2 | 1757   | 0.94721952  |
| 7 | 6 | 55206  | 0.888323584 |
| 7 | 4 | 374897 | 0.889612207 |
| 7 | 1 | 8578   | 0.668423962 |
| 7 | 7 | 91179  | 0.455790619 |
| 7 | 2 | 8796   | 0.948202264 |
| 7 | 2 | 256380 | 0.404414399 |
| 7 | 2 | 6332   | 0.947557132 |
| 7 | 7 | 222663 | 0.495918869 |
| 7 | 1 | 6383   | 0.357110322 |
| 7 | 2 | 27111  | 0.279715622 |
| 7 | 5 | 10993  | 0.594044049 |
| 7 | 5 | 113675 | 0.54202883  |
| 7 | 6 | 9871   | 0.857130323 |
| 7 | 5 | 6398   | 0.479333495 |
| 7 | 7 | 8991   | 0.689941513 |
| 7 | 1 | 6402   | 0.757113248 |
| 7 | 5 | 6403   | 0.501580028 |
| 7 | 1 | 6404   | 0.795947226 |
| 7 | 6 | 256987 | 0.858098373 |
| 7 | 5 | 5265   | 0.587079373 |
| 7 | 4 | 5054   | 0.891754027 |
| 7 | 4 | 5176   | 0.82602471  |
| 7 | 7 | 710    | 0.459945343 |

|   |   |        |             |
|---|---|--------|-------------|
| 7 | 5 | 57713  | 0.46064656  |
| 7 | 2 | 2810   | 0.741565231 |
| 7 | 4 | 6423   | 0.638306567 |
| 7 | 2 | 6439   | 0.951375185 |
| 7 | 6 | 6444   | 0.832516965 |
| 7 | 2 | 84251  | 0.944742243 |
| 7 | 5 | 4068   | 0.534434658 |
| 7 | 2 | 9047   | 0.90791517  |
| 7 | 3 | 10044  | 0.831355165 |
| 7 | 2 | 400745 | 0.826823427 |
| 7 | 3 | 126669 | 0.80255618  |
| 7 | 5 | 89790  | 0.574175498 |
| 7 | 5 | 114132 | 0.334286837 |
| 7 | 5 | 89858  | 0.535911375 |
| 7 | 5 | 8778   | 0.59542398  |
| 7 | 2 | 946    | 0.948089146 |
| 7 | 5 | 27036  | 0.590248864 |
| 7 | 2 | 27181  | 0.902062705 |
| 7 | 5 | 27180  | 0.587220754 |
| 7 | 2 | 10326  | 0.46873348  |
| 7 | 5 | 284759 | 0.589378095 |
| 7 | 5 | 27240  | 0.538611759 |
| 7 | 5 | 84174  | 0.50612181  |
| 7 | 5 | 6503   | 0.569301041 |
| 7 | 5 | 6504   | 0.498897339 |
| 7 | 1 | 114836 | 0.592258947 |
| 7 | 1 | 57823  | 0.795682791 |
| 7 | 5 | 56833  | 0.601776519 |
| 7 | 2 | 6556   | 0.410589218 |
| 7 | 2 | 6559   | 0.945549728 |
| 7 | 5 | 51296  | 0.600423763 |
| 7 | 6 | 6571   | 0.908345998 |
| 7 | 4 | 6512   | 0.893879696 |
| 7 | 2 | 123041 | 0.948042963 |
| 7 | 1 | 55315  | 0.697646086 |
| 7 | 5 | 6518   | 0.501046296 |
| 7 | 2 | 10568  | 0.950702798 |
| 7 | 2 | 29986  | 0.945564197 |
| 7 | 1 | 85414  | 0.793994195 |
| 7 | 2 | 6539   | 0.904340035 |
| 7 | 5 | 9056   | 0.591757463 |
| 7 | 6 | 6546   | 0.90148568  |
| 7 | 5 | 11309  | 0.572465936 |
| 7 | 2 | 81796  | 0.778163882 |
| 7 | 3 | 9353   | 0.832250123 |
| 7 | 1 | 6586   | 0.498578003 |
| 7 | 2 | 27293  | 0.943553054 |
| 7 | 5 | 333929 | 0.564613697 |
| 7 | 4 | 25992  | 0.883165627 |
| 7 | 7 | 6636   | 0.480141077 |
| 7 | 4 | 6641   | 0.87430801  |
| 7 | 4 | 6649   | 0.895228935 |

|   |   |        |             |
|---|---|--------|-------------|
| 7 | 2 | 6651   | 0.546526708 |
| 7 | 3 | 64321  | 0.821056061 |
| 7 | 2 | 6660   | 0.931220405 |
| 7 | 7 | 6672   | 0.699900965 |
| 7 | 7 | 3431   | 0.692176063 |
| 7 | 5 | 11262  | 0.554616261 |
| 7 | 4 | 6676   | 0.85154075  |
| 7 | 1 | 6678   | 0.413339315 |
| 7 | 3 | 8404   | 0.621660785 |
| 7 | 6 | 221178 | 0.898532678 |
| 7 | 1 | 6688   | 0.795190376 |
| 7 | 2 | 6689   | 0.941713514 |
| 7 | 5 | 6693   | 0.464265658 |
| 7 | 5 | 9806   | 0.54207172  |
| 7 | 4 | 10418  | 0.777917672 |
| 7 | 3 | 10252  | 0.817766682 |
| 7 | 2 | 6753   | 0.944580805 |
| 7 | 6 | 6483   | 0.473901178 |
| 7 | 1 | 8869   | 0.51363125  |
| 7 | 1 | 10402  | 0.784334826 |
| 7 | 5 | 6480   | 0.509896811 |
| 7 | 2 | 256435 | 0.949124281 |
| 7 | 6 | 7903   | 0.51550706  |
| 7 | 5 | 23166  | 0.582778571 |
| 7 | 5 | 246329 | 0.559424589 |
| 7 | 6 | 90627  | 0.858588318 |
| 7 | 2 | 9754   | 0.94316039  |
| 7 | 7 | 6772   | 0.737012146 |
| 7 | 2 | 6775   | 0.928185359 |
| 7 | 7 | 6776   | 0.623459365 |
| 7 | 6 | 9262   | 0.839845056 |
| 7 | 2 | 65975  | 0.942162541 |
| 7 | 6 | 6801   | 0.862538545 |
| 7 | 4 | 29091  | 0.869853503 |
| 7 | 1 | 56670  | 0.796938471 |
| 7 | 7 | 23213  | 0.562695448 |
| 7 | 2 | 6819   | 0.867952829 |
| 7 | 2 | 6820   | 0.946476918 |
| 7 | 5 | 203328 | 0.595841634 |
| 7 | 4 | 23345  | 0.87883558  |
| 7 | 6 | 23208  | 0.874678392 |
| 7 | 4 | 94120  | 0.815644694 |
| 7 | 5 | 117289 | 0.592717318 |
| 7 | 6 | 57551  | 0.885743156 |
| 7 | 7 | 6890   | 0.736167759 |
| 7 | 7 | 6891   | 0.699407609 |
| 7 | 7 | 6892   | 0.631281066 |
| 7 | 1 | 55080  | 0.591472189 |
| 7 | 5 | 374403 | 0.54444263  |
| 7 | 5 | 30009  | 0.553461936 |
| 7 | 3 | 6915   | 0.835701679 |
| 7 | 1 | 6916   | 0.786944586 |

|   |   |        |             |
|---|---|--------|-------------|
| 7 | 6 | 56849  | 0.880036904 |
| 7 | 1 | 10312  | 0.796145154 |
| 7 | 5 | 8115   | 0.510687668 |
| 7 | 7 | 6948   | 0.642269712 |
| 7 | 3 | 7010   | 0.823932066 |
| 7 | 3 | 54997  | 0.617054431 |
| 7 | 1 | 22797  | 0.769823114 |
| 7 | 1 | 7040   | 0.760469667 |
| 7 | 6 | 7042   | 0.528450668 |
| 7 | 4 | 7043   | 0.890710255 |
| 7 | 4 | 7045   | 0.890891099 |
| 7 | 6 | 7046   | 0.84812455  |
| 7 | 3 | 7048   | 0.835313229 |
| 7 | 6 | 9392   | 0.894418267 |
| 7 | 7 | 7051   | 0.429925982 |
| 7 | 1 | 7052   | 0.779445969 |
| 7 | 6 | 7057   | 0.751988963 |
| 7 | 4 | 7058   | 0.892929209 |
| 7 | 6 | 7066   | 0.792165797 |
| 7 | 4 | 7070   | 0.841538548 |
| 7 | 3 | 7075   | 0.817133152 |
| 7 | 5 | 497189 | 0.546196268 |
| 7 | 5 | 91937  | 0.30963936  |
| 7 | 2 | 92609  | 0.935942991 |
| 7 | 4 | 7077   | 0.881193228 |
| 7 | 4 | 7078   | 0.887991814 |
| 7 | 2 | 81793  | 0.902418114 |
| 7 | 5 | 7096   | 0.524795698 |
| 7 | 5 | 7099   | 0.433998691 |
| 7 | 2 | 7100   | 0.942358607 |
| 7 | 5 | 51284  | 0.575245777 |
| 7 | 5 | 51311  | 0.586389004 |
| 7 | 3 | 54106  | 0.324134539 |
| 7 | 3 | 116441 | 0.841720921 |
| 7 | 5 | 53346  | 0.564810838 |
| 7 | 5 | 147138 | 0.561725681 |
| 7 | 7 | 113277 | 0.691591719 |
| 7 | 6 | 338773 | 0.577054041 |
| 7 | 6 | 219623 | 0.882891442 |
| 7 | 6 | 83604  | 0.895505043 |
| 7 | 7 | 84283  | 0.465050521 |
| 7 | 5 | 7124   | 0.59423236  |
| 7 | 4 | 7130   | 0.888931161 |
| 7 | 5 | 79626  | 0.584232379 |
| 7 | 1 | 8797   | 0.610957216 |
| 7 | 6 | 8795   | 0.864098912 |
| 7 | 1 | 8794   | 0.567305991 |
| 7 | 4 | 8793   | 0.891616586 |
| 7 | 1 | 8792   | 0.798088022 |
| 7 | 7 | 4982   | 0.619416033 |
| 7 | 4 | 51330  | 0.887338354 |
| 7 | 5 | 23495  | 0.452118857 |

|   |   |        |             |
|---|---|--------|-------------|
| 7 | 2 | 115650 | 0.945187762 |
| 7 | 1 | 8764   | 0.795968214 |
| 7 | 2 | 608    | 0.904354452 |
| 7 | 5 | 8784   | 0.253687805 |
| 7 | 4 | 7132   | 0.791588061 |
| 7 | 5 | 7133   | 0.564190371 |
| 7 | 3 | 8718   | 0.433366385 |
| 7 | 3 | 7293   | 0.437557243 |
| 7 | 1 | 8771   | 0.759514297 |
| 7 | 5 | 943    | 0.283871821 |
| 7 | 1 | 3604   | 0.689109678 |
| 7 | 7 | 8743   | 0.719308259 |
| 7 | 1 | 8600   | 0.720992092 |
| 7 | 5 | 8742   | 0.454834424 |
| 7 | 5 | 407977 | 0.566974321 |
| 7 | 5 | 8741   | 0.588649808 |
| 7 | 5 | 10673  | 0.587050208 |
| 7 | 2 | 8740   | 0.420459849 |
| 7 | 2 | 9966   | 0.62608152  |
| 7 | 7 | 8995   | 0.728195989 |
| 7 | 4 | 7292   | 0.833515187 |
| 7 | 5 | 944    | 0.583334079 |
| 7 | 7 | 8744   | 0.693243299 |
| 7 | 6 | 23043  | 0.889406958 |
| 7 | 2 | 79931  | 0.944687426 |
| 7 | 6 | 63923  | 0.536017502 |
| 7 | 2 | 7139   | 0.944991154 |
| 7 | 6 | 64759  | 0.795019674 |
| 7 | 6 | 9760   | 0.818696921 |
| 7 | 2 | 27010  | 0.946768136 |
| 7 | 4 | 7177   | 0.846987474 |
| 7 | 4 | 23430  | 0.306607501 |
| 7 | 2 | 25823  | 0.704888186 |
| 7 | 5 | 7185   | 0.272651828 |
| 7 | 5 | 80342  | 0.530929215 |
| 7 | 2 | 50852  | 0.397718584 |
| 7 | 5 | 54210  | 0.389424593 |
| 7 | 5 | 54209  | 0.584663498 |
| 7 | 5 | 340205 | 0.582804133 |
| 7 | 7 | 6737   | 0.74646006  |
| 7 | 7 | 10346  | 0.618272809 |
| 7 | 2 | 391712 | 0.944682186 |
| 7 | 6 | 26133  | 0.714289682 |
| 7 | 1 | 51393  | 0.593000229 |
| 7 | 2 | 162514 | 0.778453588 |
| 7 | 6 | 7253   | 0.885388699 |
| 7 | 2 | 85480  | 0.289820712 |
| 7 | 1 | 441631 | 0.75202924  |
| 7 | 5 | 10077  | 0.42632452  |
| 7 | 1 | 7106   | 0.423714936 |
| 7 | 6 | 146057 | 0.86712442  |
| 7 | 2 | 158248 | 0.9498621   |

|   |   |        |             |
|---|---|--------|-------------|
| 7 | 6 | 79809  | 0.890210278 |
| 7 | 4 | 84617  | 0.894950794 |
| 7 | 2 | 7294   | 0.946694994 |
| 7 | 1 | 7305   | 0.537317971 |
| 7 | 2 | 53347  | 0.324579177 |
| 7 | 5 | 10537  | 0.516128541 |
| 7 | 7 | 9246   | 0.712895401 |
| 7 | 2 | 197131 | 0.76422093  |
| 7 | 5 | 7351   | 0.593867459 |
| 7 | 6 | 127933 | 0.892316766 |
| 7 | 6 | 80329  | 0.890173038 |
| 7 | 4 | 80328  | 0.811295409 |
| 7 | 6 | 79465  | 0.904016749 |
| 7 | 5 | 201294 | 0.478498063 |
| 7 | 6 | 8633   | 0.89547927  |
| 7 | 1 | 81622  | 0.744761772 |
| 7 | 2 | 83878  | 0.915466542 |
| 7 | 6 | 219333 | 0.896803569 |
| 7 | 6 | 158880 | 0.890374651 |
| 7 | 1 | 10911  | 0.732783108 |
| 7 | 7 | 10791  | 0.672723783 |
| 7 | 3 | 22846  | 0.696217103 |
| 7 | 5 | 7409   | 0.585808783 |
| 7 | 4 | 7412   | 0.894581863 |
| 7 | 7 | 7423   | 0.4827317   |
| 7 | 4 | 7424   | 0.573159132 |
| 7 | 2 | 27287  | 0.394696677 |
| 7 | 2 | 389136 | 0.822154899 |
| 7 | 4 | 7431   | 0.891000405 |
| 7 | 5 | 284013 | 0.601278503 |
| 7 | 2 | 8875   | 0.403585061 |
| 7 | 5 | 29802  | 0.544429838 |
| 7 | 4 | 155382 | 0.824349997 |
| 7 | 5 | 11326  | 0.599610971 |
| 7 | 3 | 7450   | 0.648258082 |
| 7 | 7 | 7453   | 0.657245022 |
| 7 | 5 | 7454   | 0.560493672 |
| 7 | 2 | 128488 | 0.950578982 |
| 7 | 6 | 8840   | 0.866868143 |
| 7 | 4 | 7472   | 0.719298797 |
| 7 | 6 | 7494   | 0.780178547 |
| 7 | 5 | 6375   | 0.457131831 |
| 7 | 5 | 6846   | 0.509013781 |
| 7 | 6 | 2829   | 0.743264831 |
| 7 | 1 | 55113  | 0.386741411 |
| 7 | 4 | 7512   | 0.878825344 |
| 7 | 5 | 7535   | 0.532945735 |
| 7 | 2 | 81030  | 0.406211476 |
| 7 | 6 | 65986  | 0.884002243 |
| 7 | 2 | 27033  | 0.928539711 |
| 7 | 6 | 253832 | 0.88899688  |
| 7 | 6 | 23414  | 0.889911613 |

|   |   |       |             |
|---|---|-------|-------------|
| 7 | 6 | 7586  | 0.845465358 |
| 7 | 5 | 84225 | 0.495935772 |
| 7 | 4 | 7739  | 0.822976205 |
| 7 | 2 | 7762  | 0.942185102 |
