# Supplementary material for: Analysis of Immune Gene Expression Subtypes Reveals Osteosarcoma Immune Heterogeneity
Source: Hindawi journal article supplement (doi:10.1155/2021/6649412), 2021-03-01
Supplement: f1 [file 6649412.f1.zip]

| subtype     | Category         | Term                                                             |
|-------------|------------------|------------------------------------------------------------------|
| Phosphoryl  | GOTERM_BP_DIRECT | GO:0035335~peptidyl-tyrosine dephosphorylation                   |
| Phosphoryl  | GOTERM_BP_DIRECT | GO:0006470~protein dephosphorylation                             |
| Phosphoryl  | GOTERM_BP_DIRECT | GO:0030225~macrophage differentiation                            |
| Phosphoryl  | GOTERM_BP_DIRECT | GO:0032496~response to lipopolysaccharide                        |
| Phosphoryl  | GOTERM_BP_DIRECT | GO:0030168~platelet activation                                   |
| Phosphoryl  | GOTERM_BP_DIRECT | GO:0030316~osteoclast differentiation                            |
| Phosphoryl  | GOTERM_BP_DIRECT | GO:0042981~regulation of apoptotic process                       |
| Phosphoryl  | GOTERM_BP_DIRECT | GO:0007229~integrin-mediated signaling pathway                   |
| Phosphoryl  | GOTERM_BP_DIRECT | GO:0045860~positive regulation of protein kinase activity        |
| Phosphoryl  | GOTERM_BP_DIRECT | GO:0032967~positive regulation of collagen biosynthetic process  |
| Phosphoryl  | GOTERM_BP_DIRECT | GO:0001934~positive regulation of protein phosphorylation        |
| Phosphoryl  | GOTERM_BP_DIRECT | GO:0001503~ossification                                          |
| Phosphoryl  | GOTERM_BP_DIRECT | GO:0033280~response to vitamin D                                 |
| Differentia | GOTERM_BP_DIRECT | GO:0007268~chemical synaptic transmission                        |
| Differentia | GOTERM_BP_DIRECT | GO:0019233~sensory perception of pain                            |
| Differentia | GOTERM_BP_DIRECT | GO:0061337~cardiac conduction                                    |
| Differentia | GOTERM_BP_DIRECT | GO:0070588~calcium ion transmembrane transport                   |
| Differentia | GOTERM_BP_DIRECT | GO:0031424~keratinization                                        |
| Differentia | GOTERM_BP_DIRECT | GO:0034765~regulation of ion transmembrane transport             |
| Angiogene   | GOTERM_BP_DIRECT | GO:0001525~angiogenesis                                          |
| Angiogene   | GOTERM_BP_DIRECT | GO:0001569~patterning of blood vessels                           |
| Angiogene   | GOTERM_BP_DIRECT | GO:0030198~extracellular matrix organization                     |
| Angiogene   | GOTERM_BP_DIRECT | GO:0003158~endothelium development                               |
| Angiogene   | GOTERM_BP_DIRECT | GO:0001938~positive regulation of endothelial cell proliferation |
| Angiogene   | GOTERM_BP_DIRECT | GO:0043410~positive regulation of MAPK cascade                   |
| Angiogene   | GOTERM_BP_DIRECT | GO:0010596~negative regulation of endothelial cell migration     |
| Angiogene   | GOTERM_BP_DIRECT | GO:0035924~cellular response to vascular endothelial growth fac  |
| Angiogene   | GOTERM_BP_DIRECT | GO:0003151~outflow tract morphogenesis                           |
| Angiogene   | GOTERM_BP_DIRECT | GO:0045766~positive regulation of angiogenesis                   |
| Angiogene   | GOTERM_BP_DIRECT | GO:0008015~blood circulation                                     |
| Angiogene   | GOTERM_BP_DIRECT | GO:0009611~response to wounding                                  |
| Angiogene   | GOTERM_BP_DIRECT | GO:0001570~vasculogenesis                                        |
| Angiogene   | GOTERM_BP_DIRECT | GO:0042311~vasodilation                                          |
| Angiogene   | GOTERM_BP_DIRECT | GO:0016525~negative regulation of angiogenesis                   |
| Angiogene   | GOTERM_BP_DIRECT | GO:0014911~positive regulation of smooth muscle cell migration   |
| Angiogene   | GOTERM_BP_DIRECT | GO:0035815~positive regulation of renal sodium excretion         |
| Angiogene   | GOTERM_BP_DIRECT | GO:0007599~hemostasis                                            |
| Angiogene   | GOTERM_BP_DIRECT | GO:0048514~blood vessel morphogenesis                            |
| Angiogene   | GOTERM_BP_DIRECT | GO:0031290~retinal ganglion cell axon guidance                   |
| Angiogene   | GOTERM_BP_DIRECT | GO:0061299~retina vasculature morphogenesis in camera-type       |
| Angiogene   | GOTERM_BP_DIRECT | GO:0090051~negative regulation of cell migration involved in spr |
| Angiogene   | GOTERM_BP_DIRECT | GO:0007156~homophilic cell adhesion via plasma membrane ad       |
| Angiogene   | GOTERM_BP_DIRECT | GO:0007507~heart development                                     |
| Angiogene   | GOTERM_BP_DIRECT | GO:0030334~regulation of cell migration                          |
| Angiogene   | GOTERM_BP_DIRECT | GO:0045907~positive regulation of vasoconstriction               |
| Angiogene   | GOTERM_BP_DIRECT | GO:0001974~blood vessel remodeling                               |
| Reactive st | GOTERM_BP_DIRECT | GO:0030199~collagen fibril organization                          |
| Reactive st | GOTERM_BP_DIRECT | GO:0030198~extracellular matrix organization                     |
| Reactive st | GOTERM_BP_DIRECT | GO:0030574~collagen catabolic process                            |
| Reactive st | GOTERM_BP_DIRECT | GO:0035987~endodermal cell differentiation                       |
| Reactive st | GOTERM_BP_DIRECT | GO:0007155~cell adhesion                                         |

|             |                  |                                                                  |
|-------------|------------------|------------------------------------------------------------------|
| Reactive st | GOTERM_BP_DIRECT | GO:0007568~aging                                                 |
| Reactive st | GOTERM_BP_DIRECT | GO:0001501~skeletal system development                           |
| Reactive st | GOTERM_BP_DIRECT | GO:0001666~response to hypoxia                                   |
| Reactive st | GOTERM_BP_DIRECT | GO:0046426~negative regulation of JAK-STAT cascade               |
| Reactive st | GOTERM_BP_DIRECT | GO:0070208~protein heterotrimerization                           |
| Reactive st | GOTERM_BP_DIRECT | GO:0043206~extracellular fibril organization                     |
| Reactive st | GOTERM_BP_DIRECT | GO:0071230~cellular response to amino acid stimulus              |
| Reactive st | GOTERM_BP_DIRECT | GO:0009612~response to mechanical stimulus                       |
| Reactive st | GOTERM_BP_DIRECT | GO:0022617~extracellular matrix disassembly                      |
| Reactive st | GOTERM_BP_DIRECT | GO:0007160~cell-matrix adhesion                                  |
| Reactive st | GOTERM_BP_DIRECT | GO:0032355~response to estradiol                                 |
| Reactive st | GOTERM_BP_DIRECT | GO:0043408~regulation of MAPK cascade                            |
| Reactive st | GOTERM_BP_DIRECT | GO:0001525~angiogenesis                                          |
| Reactive st | GOTERM_BP_DIRECT | GO:0060395~SMAD protein signal transduction                      |
| Reactive st | GOTERM_BP_DIRECT | GO:0016055~Wnt signaling pathway                                 |
| Reactive st | GOTERM_BP_DIRECT | GO:0060325~face morphogenesis                                    |
| Reactive st | GOTERM_BP_DIRECT | GO:0030178~negative regulation of Wnt signaling pathway          |
| Reactive st | GOTERM_BP_DIRECT | GO:0042633~hair cycle                                            |
| Reactive st | GOTERM_BP_DIRECT | GO:0071560~cellular response to transforming growth factor bet   |
| Reactive st | GOTERM_BP_DIRECT | GO:0007601~visual perception                                     |
| Reactive st | GOTERM_BP_DIRECT | GO:0008284~positive regulation of cell proliferation             |
| Reactive st | GOTERM_BP_DIRECT | GO:0002576~platelet degranulation                                |
| Reactive st | GOTERM_BP_DIRECT | GO:0006469~negative regulation of protein kinase activity        |
| T cell      | GOTERM_BP_DIRECT | GO:0006955~immune response                                       |
| T cell      | GOTERM_BP_DIRECT | GO:0031295~T cell costimulation                                  |
| T cell      | GOTERM_BP_DIRECT | GO:0006954~inflammatory response                                 |
| T cell      | GOTERM_BP_DIRECT | GO:0002504~antigen processing and presentation of peptide or     |
| T cell      | GOTERM_BP_DIRECT | GO:0007186~G-protein coupled receptor signaling pathway          |
| T cell      | GOTERM_BP_DIRECT | GO:0050776~regulation of immune response                         |
| T cell      | GOTERM_BP_DIRECT | GO:0070098~chemokine-mediated signaling pathway                  |
| T cell      | GOTERM_BP_DIRECT | GO:0042102~positive regulation of T cell proliferation           |
| T cell      | GOTERM_BP_DIRECT | GO:0006935~chemotaxis                                            |
| T cell      | GOTERM_BP_DIRECT | GO:0071346~cellular response to interferon-gamma                 |
| T cell      | GOTERM_BP_DIRECT | GO:0019886~antigen processing and presentation of exogenous      |
| T cell      | GOTERM_BP_DIRECT | GO:0006959~humoral immune response                               |
| T cell      | GOTERM_BP_DIRECT | GO:0030593~neutrophil chemotaxis                                 |
| T cell      | GOTERM_BP_DIRECT | GO:0042130~negative regulation of T cell proliferation           |
| T cell      | GOTERM_BP_DIRECT | GO:0007267~cell-cell signaling                                   |
| T cell      | GOTERM_BP_DIRECT | GO:0090023~positive regulation of neutrophil chemotaxis          |
| T cell      | GOTERM_BP_DIRECT | GO:0019882~antigen processing and presentation                   |
| T cell      | GOTERM_BP_DIRECT | GO:0071222~cellular response to lipopolysaccharide               |
| T cell      | GOTERM_BP_DIRECT | GO:0031663~lipopolysaccharide-mediated signaling pathway         |
| T cell      | GOTERM_BP_DIRECT | GO:0060333~interferon-gamma-mediated signaling pathway           |
| T cell      | GOTERM_BP_DIRECT | GO:0045087~innate immune response                                |
| T cell      | GOTERM_BP_DIRECT | GO:0060326~cell chemotaxis                                       |
| T cell      | GOTERM_BP_DIRECT | GO:0050852~T cell receptor signaling pathway                     |
| T cell      | GOTERM_BP_DIRECT | GO:0006968~cellular defense response                             |
| T cell      | GOTERM_BP_DIRECT | GO:0045086~positive regulation of interleukin-2 biosynthetic pro |
| T cell      | GOTERM_BP_DIRECT | GO:0032760~positive regulation of tumor necrosis factor product  |
| T cell      | GOTERM_BP_DIRECT | GO:0050729~positive regulation of inflammatory response          |
| T cell      | GOTERM_BP_DIRECT | GO:0071347~cellular response to interleukin-1                    |
| T cell      | GOTERM_BP_DIRECT | GO:0045060~negative thymic T cell selection                      |

|        |                  |                                                                      |
|--------|------------------|----------------------------------------------------------------------|
| T cell | GOTERM_BP_DIRECT | GO:0032729~positive regulation of interferon-gamma production        |
| T cell | GOTERM_BP_DIRECT | GO:0032689~negative regulation of interferon-gamma production        |
| T cell | GOTERM_BP_DIRECT | GO:0006952~defense response                                          |
| T cell | GOTERM_BP_DIRECT | GO:0071356~cellular response to tumor necrosis factor                |
| T cell | GOTERM_BP_DIRECT | GO:0070374~positive regulation of ERK1 and ERK2 cascade              |
| T cell | GOTERM_BP_DIRECT | GO:0032753~positive regulation of interleukin-4 production           |
| T cell | GOTERM_BP_DIRECT | GO:0002548~monocyte chemotaxis                                       |
| T cell | GOTERM_BP_DIRECT | GO:0007165~signal transduction                                       |
| T cell | GOTERM_BP_DIRECT | GO:0042110~T cell activation                                         |
| T cell | GOTERM_BP_DIRECT | GO:0032720~negative regulation of tumor necrosis factor production   |
| T cell | GOTERM_BP_DIRECT | GO:0042535~positive regulation of tumor necrosis factor biosynthesis |
| T cell | GOTERM_BP_DIRECT | GO:0046641~positive regulation of alpha-beta T cell proliferation    |
| T cell | GOTERM_BP_DIRECT | GO:0001771~immunological synapse formation                           |
| T cell | GOTERM_BP_DIRECT | GO:0048247~lymphocyte chemotaxis                                     |
| T cell | GOTERM_BP_DIRECT | GO:0002690~positive regulation of leukocyte chemotaxis               |
| T cell | GOTERM_BP_DIRECT | GO:0050830~defense response to Gram-positive bacterium               |
| T cell | GOTERM_BP_DIRECT | GO:0006915~apoptotic process                                         |
| T cell | GOTERM_BP_DIRECT | GO:0042742~defense response to bacterium                             |
| T cell | GOTERM_BP_DIRECT | GO:0034142~toll-like receptor 4 signaling pathway                    |
| T cell | GOTERM_BP_DIRECT | GO:0097190~apoptotic signaling pathway                               |
| T cell | GOTERM_BP_DIRECT | GO:0042346~positive regulation of NF-kappaB import into nucleus      |
| T cell | GOTERM_BP_DIRECT | GO:0002250~adaptive immune response                                  |
| T cell | GOTERM_BP_DIRECT | GO:0051897~positive regulation of protein kinase B signaling         |
| T cell | GOTERM_BP_DIRECT | GO:0032703~negative regulation of interleukin-2 production           |
| T cell | GOTERM_BP_DIRECT | GO:0048246~macrophage chemotaxis                                     |
| T cell | GOTERM_BP_DIRECT | GO:0090630~activation of GTPase activity                             |
| T cell | GOTERM_BP_DIRECT | GO:0032496~response to lipopolysaccharide                            |
| T cell | GOTERM_BP_DIRECT | GO:0032735~positive regulation of interleukin-12 production          |
| T cell | GOTERM_BP_DIRECT | GO:0032715~negative regulation of interleukin-6 production           |
| T cell | GOTERM_BP_DIRECT | GO:0050870~positive regulation of T cell activation                  |
| T cell | GOTERM_BP_DIRECT | GO:0002523~leukocyte migration involved in inflammatory response     |
| T cell | GOTERM_BP_DIRECT | GO:0006956~complement activation                                     |
| T cell | GOTERM_BP_DIRECT | GO:0019835~cytolysis                                                 |
| T cell | GOTERM_BP_DIRECT | GO:0006909~phagocytosis                                              |
| T cell | GOTERM_BP_DIRECT | GO:0045580~regulation of T cell differentiation                      |
| T cell | GOTERM_BP_DIRECT | GO:0045059~positive thymic T cell selection                          |
| T cell | GOTERM_BP_DIRECT | GO:0070266~necroptotic process                                       |
| T cell | GOTERM_BP_DIRECT | GO:0045410~positive regulation of interleukin-6 biosynthetic process |
| T cell | GOTERM_BP_DIRECT | GO:0030816~positive regulation of cAMP metabolic process             |
| T cell | GOTERM_BP_DIRECT | GO:0045416~positive regulation of interleukin-8 biosynthetic process |
| T cell | GOTERM_BP_DIRECT | GO:0001768~establishment of T cell polarity                          |
| T cell | GOTERM_BP_DIRECT | GO:0002503~peptide antigen assembly with MHC class II protein        |
| T cell | GOTERM_BP_DIRECT | GO:0007166~cell surface receptor signaling pathway                   |
| T cell | GOTERM_BP_DIRECT | GO:0002224~toll-like receptor signaling pathway                      |
| T cell | GOTERM_BP_DIRECT | GO:0050715~positive regulation of cytokine secretion                 |
| T cell | GOTERM_BP_DIRECT | GO:0030889~negative regulation of B cell proliferation               |
| T cell | GOTERM_BP_DIRECT | GO:0010818~T cell chemotaxis                                         |
| T cell | GOTERM_BP_DIRECT | GO:0051044~positive regulation of membrane protein ectodomain        |
| T cell | GOTERM_BP_DIRECT | GO:0032722~positive regulation of chemokine production               |
| T cell | GOTERM_BP_DIRECT | GO:0042088~T-helper 1 type immune response                           |
| T cell | GOTERM_BP_DIRECT | GO:0050900~leukocyte migration                                       |
| T cell | GOTERM_BP_DIRECT | GO:0042832~defense response to protozoan                             |

|              |                  |                                                                    |
|--------------|------------------|--------------------------------------------------------------------|
| T cell       | GOTERM_BP_DIRECT | GO:0007249~I-kappaB kinase/NF-kappaB signaling                     |
| T cell       | GOTERM_BP_DIRECT | GO:0002755~MyD88-dependent toll-like receptor signaling path       |
| T cell       | GOTERM_BP_DIRECT | GO:0001916~positive regulation of T cell mediated cytotoxicity     |
| T cell       | GOTERM_BP_DIRECT | GO:0002479~antigen processing and presentation of exogenous        |
| TGF- $\beta$ | GOTERM_BP_DIRECT | GO:0006468~protein phosphorylation                                 |
| TGF- $\beta$ | GOTERM_BP_DIRECT | GO:0090090~negative regulation of canonical Wnt signaling path     |
| TGF- $\beta$ | GOTERM_BP_DIRECT | GO:0043161~proteasome-mediated ubiquitin-dependent protei          |
| TGF- $\beta$ | GOTERM_BP_DIRECT | GO:0038061~NIK/NF-kappaB signaling                                 |
| TGF- $\beta$ | GOTERM_BP_DIRECT | GO:0070120~ciliary neurotrophic factor-mediated signaling path     |
| TGF- $\beta$ | GOTERM_BP_DIRECT | GO:0006511~ubiquitin-dependent protein catabolic process           |
| TGF- $\beta$ | GOTERM_BP_DIRECT | GO:0043488~regulation of mRNA stability                            |
| TGF- $\beta$ | GOTERM_BP_DIRECT | GO:0035556~intracellular signal transduction                       |
| TGF- $\beta$ | GOTERM_BP_DIRECT | GO:0090263~positive regulation of canonical Wnt signaling pathv    |
| TGF- $\beta$ | GOTERM_BP_DIRECT | GO:0006521~regulation of cellular amino acid metabolic process     |
| TGF- $\beta$ | GOTERM_BP_DIRECT | GO:0051436~negative regulation of ubiquitin-protein ligase activ   |
| TGF- $\beta$ | GOTERM_BP_DIRECT | GO:0031145~anaphase-promoting complex-dependent catabol            |
| TGF- $\beta$ | GOTERM_BP_DIRECT | GO:0051437~positive regulation of ubiquitin-protein ligase activit |
| TGF- $\beta$ | GOTERM_BP_DIRECT | GO:0060071~Wnt signaling pathway, planar cell polarity pathway     |
| TGF- $\beta$ | GOTERM_BP_DIRECT | GO:0006366~transcription from RNA polymerase II promoter           |
| TGF- $\beta$ | GOTERM_BP_DIRECT | GO:0018107~peptidyl-threonine phosphorylation                      |
| TGF- $\beta$ | GOTERM_BP_DIRECT | GO:0045669~positive regulation of osteoblast differentiation       |
| TGF- $\beta$ | GOTERM_BP_DIRECT | GO:0002223~stimulatory C-type lectin receptor signaling pathwa     |
| TGF- $\beta$ | GOTERM_BP_DIRECT | GO:0007399~nervous system development                              |
| TGF- $\beta$ | GOTERM_BP_DIRECT | GO:0003148~outflow tract septum morphogenesis                      |
| TGF- $\beta$ | GOTERM_BP_DIRECT | GO:0035329~hippo signaling                                         |
| TGF- $\beta$ | GOTERM_BP_DIRECT | GO:0000165~MAPK cascade                                            |
| TGF- $\beta$ | GOTERM_BP_DIRECT | GO:0002479~antigen processing and presentation of exogenous        |
| TGF- $\beta$ | GOTERM_BP_DIRECT | GO:0006986~response to unfolded protein                            |
| TGF- $\beta$ | GOTERM_BP_DIRECT | GO:0000082~G1/S transition of mitotic cell cycle                   |
| TGF- $\beta$ | GOTERM_BP_DIRECT | GO:0060412~ventricular septum morphogenesis                        |
| TGF- $\beta$ | GOTERM_BP_DIRECT | GO:0023014~signal transduction by protein phosphorylation          |
| TGF- $\beta$ | GOTERM_BP_DIRECT | GO:0000209~protein polyubiquitination                              |
| TGF- $\beta$ | GOTERM_BP_DIRECT | GO:0018105~peptidyl-serine phosphorylation                         |
| TGF- $\beta$ | GOTERM_BP_DIRECT | GO:0060271~cilium morphogenesis                                    |
| TGF- $\beta$ | GOTERM_BP_DIRECT | GO:0030900~forebrain development                                   |
| TGF- $\beta$ | GOTERM_BP_DIRECT | GO:0006355~regulation of transcription, DNA-templated              |
| TGF- $\beta$ | GOTERM_BP_DIRECT | GO:0051301~cell division                                           |
| TGF- $\beta$ | GOTERM_BP_DIRECT | GO:0006457~protein folding                                         |
| TGF- $\beta$ | GOTERM_BP_DIRECT | GO:0001701~in utero embryonic development                          |
| TGF- $\beta$ | GOTERM_BP_DIRECT | GO:0046777~protein autophosphorylation                             |
| TGF- $\beta$ | GOTERM_BP_DIRECT | GO:0045893~positive regulation of transcription, DNA-templat       |
| TGF- $\beta$ | GOTERM_BP_DIRECT | GO:2001237~negative regulation of extrinsic apoptotic signaling    |
| TGF- $\beta$ | GOTERM_BP_DIRECT | GO:0032956~regulation of actin cytoskeleton organization           |
| TGF- $\beta$ | GOTERM_BP_DIRECT | GO:0007178~transmembrane receptor protein serine/threonine         |
| TGF- $\beta$ | GOTERM_BP_DIRECT | GO:0001707~mesoderm formation                                      |
| TGF- $\beta$ | GOTERM_BP_DIRECT | GO:0009755~hormone-mediated signaling pathway                      |
| TGF- $\beta$ | GOTERM_BP_DIRECT | GO:0043065~positive regulation of apoptotic process                |
| TGF- $\beta$ | GOTERM_BP_DIRECT | GO:0038095~Fc-epsilon receptor signaling pathway                   |
| TGF- $\beta$ | GOTERM_BP_DIRECT | GO:0045600~positive regulation of fat cell differentiation         |
| TGF- $\beta$ | GOTERM_BP_DIRECT | GO:0051726~regulation of cell cycle                                |
| TGF- $\beta$ | GOTERM_BP_DIRECT | GO:0014033~neural crest cell differentiation                       |
| TGF- $\beta$ | GOTERM_BP_DIRECT | GO:0061626~pharyngeal arch artery morphogenesis                    |

|               |                  |                                                                    |
|---------------|------------------|--------------------------------------------------------------------|
| TGF- $\beta$  | GOTERM_BP_DIRECT | GO:0003223~ventricular compact myocardium morphogenesis            |
| TGF- $\beta$  | GOTERM_BP_DIRECT | GO:0043254~regulation of protein complex assembly                  |
| TGF- $\beta$  | GOTERM_BP_DIRECT | GO:0048568~embryonic organ development                             |
| TGF- $\beta$  | GOTERM_BP_DIRECT | GO:0003183~mitral valve morphogenesis                              |
| TGF- $\beta$  | GOTERM_BP_DIRECT | GO:0045899~positive regulation of RNA polymerase II transcripti    |
| TGF- $\beta$  | GOTERM_BP_DIRECT | GO:1900034~regulation of cellular response to heat                 |
| TGF- $\beta$  | GOTERM_BP_DIRECT | GO:0048666~neuron development                                      |
| TGF- $\beta$  | GOTERM_BP_DIRECT | GO:0016055~Wnt signaling pathway                                   |
| TGF- $\beta$  | GOTERM_BP_DIRECT | GO:0030501~positive regulation of bone mineralization              |
| TGF- $\beta$  | GOTERM_BP_DIRECT | GO:0060021~palate development                                      |
| TGF- $\beta$  | GOTERM_BP_DIRECT | GO:0072659~protein localization to plasma membrane                 |
| IFN- $\gamma$ | GOTERM_BP_DIRECT | GO:0060337~type I interferon signaling pathway                     |
| IFN- $\gamma$ | GOTERM_BP_DIRECT | GO:0009615~response to virus                                       |
| IFN- $\gamma$ | GOTERM_BP_DIRECT | GO:0051607~defense response to virus                               |
| IFN- $\gamma$ | GOTERM_BP_DIRECT | GO:0060333~interferon-gamma-mediated signaling pathway             |
| IFN- $\gamma$ | GOTERM_BP_DIRECT | GO:0045071~negative regulation of viral genome replication         |
| IFN- $\gamma$ | GOTERM_BP_DIRECT | GO:0000209~protein polyubiquitination                              |
| IFN- $\gamma$ | GOTERM_BP_DIRECT | GO:0002474~antigen processing and presentation of peptide anti     |
| IFN- $\gamma$ | GOTERM_BP_DIRECT | GO:0002479~antigen processing and presentation of exogenous        |
| IFN- $\gamma$ | GOTERM_BP_DIRECT | GO:0060071~Wnt signaling pathway, planar cell polarity pathway     |
| IFN- $\gamma$ | GOTERM_BP_DIRECT | GO:0006521~regulation of cellular amino acid metabolic process     |
| IFN- $\gamma$ | GOTERM_BP_DIRECT | GO:0051436~negative regulation of ubiquitin-protein ligase activ   |
| IFN- $\gamma$ | GOTERM_BP_DIRECT | GO:0051437~positive regulation of ubiquitin-protein ligase activit |
| IFN- $\gamma$ | GOTERM_BP_DIRECT | GO:0031145~anaphase-promoting complex-dependent catabol            |
| IFN- $\gamma$ | GOTERM_BP_DIRECT | GO:0038095~Fc-epsilon receptor signaling pathway                   |
| IFN- $\gamma$ | GOTERM_BP_DIRECT | GO:0043161~proteasome-mediated ubiquitin-dependent protei          |
| IFN- $\gamma$ | GOTERM_BP_DIRECT | GO:0038061~NIK/NF-kappaB signaling                                 |
| IFN- $\gamma$ | GOTERM_BP_DIRECT | GO:0043488~regulation of mRNA stability                            |
| IFN- $\gamma$ | GOTERM_BP_DIRECT | GO:0002223~stimulatory C-type lectin receptor signaling pathwa     |
| IFN- $\gamma$ | GOTERM_BP_DIRECT | GO:0090263~positive regulation of canonical Wnt signaling pathv    |
| IFN- $\gamma$ | GOTERM_BP_DIRECT | GO:0090090~negative regulation of canonical Wnt signaling path     |
| IFN- $\gamma$ | GOTERM_BP_DIRECT | GO:0035456~response to interferon-beta                             |
| IFN- $\gamma$ | GOTERM_BP_DIRECT | GO:0019885~antigen processing and presentation of endogenou        |
| IFN- $\gamma$ | GOTERM_BP_DIRECT | GO:0032728~positive regulation of interferon-beta production       |
| IFN- $\gamma$ | GOTERM_BP_DIRECT | GO:0045787~positive regulation of cell cycle                       |
| IFN- $\gamma$ | GOTERM_BP_DIRECT | GO:0033209~tumor necrosis factor-mediated signaling pathway        |
| IFN- $\gamma$ | GOTERM_BP_DIRECT | GO:0032897~negative regulation of viral transcription              |
| IFN- $\gamma$ | GOTERM_BP_DIRECT | GO:0007259~JAK-STAT cascade                                        |
| IFN- $\gamma$ | GOTERM_BP_DIRECT | GO:0016925~protein sumoylation                                     |
| IFN- $\gamma$ | GOTERM_BP_DIRECT | GO:0032727~positive regulation of interferon-alpha production      |
| IFN- $\gamma$ | GOTERM_BP_DIRECT | GO:0035455~response to interferon-alpha                            |
| IFN- $\gamma$ | GOTERM_BP_DIRECT | GO:0002481~antigen processing and presentation of exogenous        |

| Count | %        | PValue      |
|-------|----------|-------------|
| 6     | 3.529412 | 1.75E-03    |
| 6     | 3.529412 | 2.78E-03    |
| 4     | 2.352941 | 1.21E-02    |
| 13    | 7.647059 | 1.55E-02    |
| 8     | 4.705882 | 1.85E-02    |
| 4     | 2.352941 | 1.98E-02    |
| 9     | 5.294118 | 3.23E-02    |
| 8     | 4.705882 | 3.48E-02    |
| 5     | 2.941176 | 0.041048317 |
| 4     | 2.352941 | 0.041538026 |
| 7     | 4.117647 | 0.042607602 |
| 6     | 3.529412 | 0.043659292 |
| 3     | 1.764706 | 0.043918657 |
| 7     | 2.348993 | 0.012294309 |
| 5     | 1.677852 | 0.035739089 |
| 4     | 1.342282 | 0.04944385  |
| 6     | 2.013423 | 0.049475398 |
| 6     | 2.013423 | 0.049475398 |
| 6     | 2.013423 | 0.049475398 |
| 21    | 15.44118 | 1.33E-08    |
| 6     | 4.411765 | 5.29E-04    |
| 14    | 10.29412 | 0.001290604 |
| 4     | 2.941176 | 0.001302494 |
| 8     | 5.882353 | 0.001562825 |
| 8     | 5.882353 | 0.001987768 |
| 5     | 3.676471 | 0.002254758 |
| 5     | 3.676471 | 0.002254758 |
| 5     | 3.676471 | 0.003554191 |
| 10    | 7.352941 | 0.00445473  |
| 6     | 4.411765 | 0.005012779 |
| 6     | 4.411765 | 0.005012779 |
| 5     | 3.676471 | 0.005283005 |
| 4     | 2.941176 | 0.005859092 |
| 7     | 5.147059 | 0.006357053 |
| 4     | 2.941176 | 0.009728081 |
| 3     | 2.205882 | 0.014134378 |
| 3     | 2.205882 | 0.014134378 |
| 3     | 2.205882 | 0.026966262 |
| 3     | 2.205882 | 0.026966262 |
| 3     | 2.205882 | 0.026966262 |
| 3     | 2.205882 | 0.026966262 |
| 6     | 4.411765 | 0.031930606 |
| 6     | 4.411765 | 0.031930606 |
| 5     | 3.676471 | 0.03331084  |
| 4     | 2.941176 | 0.047139987 |
| 4     | 2.941176 | 0.047139987 |
| 14    | 7.45E+00 | 7.26E-09    |
| 26    | 1.38E+01 | 8.01E-09    |
| 15    | 7.98E+00 | 6.34E-07    |
| 8     | 4.255319 | 9.57E-05    |
| 28    | 14.89362 | 3.33E-04    |

|     |          |             |
|-----|----------|-------------|
| 12  | 6.382979 | 6.60E-04    |
| 10  | 5.319149 | 0.001113419 |
| 11  | 5.851064 | 0.002073798 |
| 5   | 2.659574 | 0.002739261 |
| 4   | 2.12766  | 0.00373327  |
| 4   | 2.12766  | 0.00373327  |
| 6   | 3.191489 | 0.006459259 |
| 6   | 3.191489 | 0.00923986  |
| 8   | 4.255319 | 0.009359768 |
| 9   | 4.787234 | 0.011472811 |
| 6   | 3.191489 | 0.012748251 |
| 4   | 2.12766  | 0.016009432 |
| 14  | 7.446809 | 0.017336794 |
| 5   | 2.659574 | 0.018675649 |
| 6   | 3.191489 | 0.022239883 |
| 4   | 2.12766  | 0.02596206  |
| 4   | 2.12766  | 0.02596206  |
| 3   | 1.595745 | 0.028303063 |
| 6   | 3.191489 | 0.028343863 |
| 6   | 3.191489 | 0.028343863 |
| 17  | 9.042553 | 0.041015159 |
| 9   | 4.787234 | 0.041706678 |
| 5   | 2.659574 | 0.044562978 |
| 106 | 2.70E+01 | 1.14E-19    |
| 29  | 7.38E+00 | 8.35E-11    |
| 73  | 1.86E+01 | 1.64E-09    |
| 13  | 3.31E+00 | 3.74E-08    |
| 56  | 1.42E+01 | 5.47E-08    |
| 41  | 1.04E+01 | 7.93E-08    |
| 31  | 7.89E+00 | 2.92E-07    |
| 23  | 5.85E+00 | 1.32E-06    |
| 32  | 8.14E+00 | 1.45E-06    |
| 21  | 5.34E+00 | 3.53E-06    |
| 16  | 4.07E+00 | 5.56E-06    |
| 18  | 4.58E+00 | 8.46E-06    |
| 24  | 6.11E+00 | 1.47E-05    |
| 13  | 3.31E+00 | 1.99E-05    |
| 36  | 9.16E+00 | 2.24E-05    |
| 11  | 2.80E+00 | 4.22E-05    |
| 19  | 4.83E+00 | 7.22E-05    |
| 22  | 5.60E+00 | 8.75E-05    |
| 11  | 2.80E+00 | 1.04E-04    |
| 21  | 5.34E+00 | 2.05E-04    |
| 44  | 1.12E+01 | 2.20E-04    |
| 19  | 4.83E+00 | 2.55E-04    |
| 27  | 6.870229 | 3.95E-04    |
| 18  | 4.580153 | 6.01E-04    |
| 8   | 2.035623 | 8.29E-04    |
| 12  | 3.053435 | 8.95E-04    |
| 21  | 5.343511 | 0.001047053 |
| 16  | 4.071247 | 0.001087439 |
| 7   | 1.78117  | 0.001193164 |

|    |          |             |
|----|----------|-------------|
| 15 | 3.816794 | 0.001206228 |
| 10 | 2.544529 | 0.001393715 |
| 16 | 4.071247 | 0.001562299 |
| 18 | 4.580153 | 0.001653499 |
| 27 | 6.870229 | 0.002126014 |
| 9  | 2.290076 | 0.002290171 |
| 16 | 4.071247 | 0.003037615 |
| 71 | 18.06616 | 0.003255602 |
| 12 | 3.053435 | 0.003541528 |
| 8  | 2.035623 | 0.003767562 |
| 6  | 1.526718 | 0.004576108 |
| 6  | 1.526718 | 0.004576108 |
| 6  | 1.526718 | 0.004576108 |
| 12 | 3.053435 | 0.005213648 |
| 7  | 1.78117  | 0.006203833 |
| 11 | 2.798982 | 0.008494441 |
| 28 | 7.124682 | 0.009657874 |
| 14 | 3.562341 | 0.010136151 |
| 6  | 1.526718 | 0.010214348 |
| 12 | 3.053435 | 0.010376456 |
| 8  | 2.035623 | 0.011268572 |
| 28 | 7.124682 | 0.01135083  |
| 12 | 3.053435 | 0.014106334 |
| 5  | 1.272265 | 0.016753885 |
| 5  | 1.272265 | 0.016753885 |
| 5  | 1.272265 | 0.016753885 |
| 22 | 5.597964 | 0.016775005 |
| 8  | 2.035623 | 0.01757296  |
| 7  | 1.78117  | 0.018989642 |
| 6  | 1.526718 | 0.019258364 |
| 6  | 1.526718 | 0.019258364 |
| 6  | 1.526718 | 0.019258364 |
| 6  | 1.526718 | 0.019258364 |
| 9  | 2.290076 | 0.022573051 |
| 4  | 1.017812 | 0.027006568 |
| 4  | 1.017812 | 0.027006568 |
| 4  | 1.017812 | 0.027006568 |
| 4  | 1.017812 | 0.027006568 |
| 4  | 1.017812 | 0.027006568 |
| 4  | 1.017812 | 0.027006568 |
| 4  | 1.017812 | 0.027006568 |
| 4  | 1.017812 | 0.027006568 |
| 28 | 7.124682 | 0.027200124 |
| 7  | 1.78117  | 0.029455589 |
| 6  | 1.526718 | 0.032312894 |
| 5  | 1.272265 | 0.03299092  |
| 5  | 1.272265 | 0.03299092  |
| 5  | 1.272265 | 0.03299092  |
| 5  | 1.272265 | 0.03299092  |
| 5  | 1.272265 | 0.03299092  |
| 17 | 4.3257   | 0.034484222 |
| 7  | 1.78117  | 0.043095852 |



|    |          |             |
|----|----------|-------------|
| 7  | 1.78117  | 0.043095852 |
| 6  | 1.526718 | 0.049758138 |
| 6  | 1.526718 | 0.049758138 |
| 14 | 3.562341 | 0.049853567 |
| 22 | 9.606987 | 3.33E-06    |
| 15 | 6.550218 | 1.75E-04    |
| 13 | 5.676856 | 2.64E-04    |
| 11 | 4.803493 | 7.39E-04    |
| 5  | 2.183406 | 9.62E-04    |
| 8  | 3.49345  | 9.69E-04    |
| 11 | 4.803493 | 0.001029006 |
| 18 | 7.860262 | 0.001052843 |
| 12 | 5.240175 | 0.001119538 |
| 10 | 4.366812 | 0.001237341 |
| 10 | 4.366812 | 0.001237341 |
| 10 | 4.366812 | 0.001237341 |
| 10 | 4.366812 | 0.001237341 |
| 11 | 4.803493 | 0.00140613  |
| 15 | 6.550218 | 0.002549049 |
| 5  | 2.183406 | 0.002610187 |
| 8  | 3.49345  | 0.004940155 |
| 12 | 5.240175 | 0.004982465 |
| 9  | 3.930131 | 0.005410311 |
| 5  | 2.183406 | 0.005512713 |
| 4  | 1.746725 | 0.00644957  |
| 17 | 7.423581 | 0.006563635 |
| 12 | 5.240175 | 0.007528906 |
| 6  | 2.620087 | 0.009752696 |
| 5  | 2.183406 | 0.009983975 |
| 5  | 2.183406 | 0.009983975 |
| 7  | 3.056769 | 0.011670209 |
| 10 | 4.366812 | 0.013654773 |
| 6  | 2.620087 | 0.014308067 |
| 4  | 1.746725 | 0.014681443 |
| 4  | 1.746725 | 0.014681443 |
| 20 | 8.733624 | 0.01479699  |
| 5  | 2.183406 | 0.01628096  |
| 6  | 2.620087 | 0.020101271 |
| 7  | 3.056769 | 0.0207669   |
| 9  | 3.930131 | 0.022571332 |
| 15 | 6.550218 | 0.023336868 |
| 5  | 2.183406 | 0.024594256 |
| 5  | 2.183406 | 0.024594256 |
| 5  | 2.183406 | 0.024594256 |
| 4  | 1.746725 | 0.026752698 |
| 4  | 1.746725 | 0.026752698 |
| 12 | 5.240175 | 0.028798396 |
| 10 | 4.366812 | 0.033608069 |
| 5  | 2.183406 | 0.035046058 |
| 5  | 2.183406 | 0.035046058 |
| 3  | 1.310044 | 0.040563981 |
| 3  | 1.310044 | 0.040563981 |

|    |          |             |
|----|----------|-------------|
| 3  | 1.310044 | 0.040563981 |
| 3  | 1.310044 | 0.040563981 |
| 3  | 1.310044 | 0.040563981 |
| 3  | 1.310044 | 0.040563981 |
| 4  | 1.746725 | 0.042682687 |
| 4  | 1.746725 | 0.042682687 |
| 4  | 1.746725 | 0.042682687 |
| 6  | 2.620087 | 0.045871753 |
| 6  | 2.620087 | 0.045871753 |
| 5  | 2.183406 | 0.04769274  |
| 5  | 2.183406 | 0.04769274  |
| 21 | 14.09396 | 2.96E-13    |
| 19 | 12.75168 | 4.80E-09    |
| 21 | 14.09396 | 1.60E-08    |
| 17 | 11.4094  | 9.19E-08    |
| 10 | 6.711409 | 5.47E-07    |
| 12 | 8.053691 | 1.75E-05    |
| 9  | 6.040268 | 1.31E-04    |
| 12 | 8.053691 | 1.66E-04    |
| 10 | 6.711409 | 2.00E-04    |
| 9  | 6.040268 | 2.64E-04    |
| 11 | 7.38255  | 3.96E-04    |
| 10 | 6.711409 | 5.88E-04    |
| 9  | 6.040268 | 6.53E-04    |
| 9  | 6.040268 | 8.56E-04    |
| 10 | 6.711409 | 0.002161284 |
| 9  | 6.040268 | 0.002742408 |
| 10 | 6.711409 | 0.00312608  |
| 4  | 2.684564 | 0.007592174 |
| 4  | 2.684564 | 0.012540051 |
| 4  | 2.684564 | 0.012540051 |
| 4  | 2.684564 | 0.012540051 |
| 12 | 8.053691 | 0.014483579 |
| 3  | 2.013423 | 0.016886858 |
| 5  | 3.355705 | 0.018547866 |
| 3  | 2.013423 | 0.032068049 |
| 3  | 2.013423 | 0.032068049 |
| 3  | 2.013423 | 0.032068049 |
| 3  | 2.013423 | 0.032068049 |

## Genes

5795, 5800, 26191, 5778, 5788, 1846  
57460, 5800, 26191, 132160, 5778, 5788  
1436, 1435, 4318, 6688  
958, 3604, 8764, 6678, 1439, 8797, 8771, 6374, 8792, 26191, 8794, 4791, 54  
958, 408, 2769, 2207, 3690, 27040, 5294, 2153  
1436, 1435, 8792, 8600  
8797, 7040, 8792, 8794, 838, 3604, 655, 8764, 1508  
81794, 3687, 7305, 27299, 2207, 3690, 27040, 101  
920, 1435, 27040, 5788, 9770  
90993, 7040, 10911, 2022  
1436, 958, 408, 7040, 4318, 3690, 2022  
8792, 4318, 655, 6678, 9770, 8600  
920, 7040, 655  
3779, 6753, 3751, 9495, 8973, 1621, 6539  
116, 3593, 3751, 59344, 1269  
9424, 3751, 3757, 9254  
162514, 123041, 9254, 116443, 489, 255231  
5493, 1001, 84518, 3713, 2810, 2125  
9424, 3751, 23704, 3766, 9254, 6332  
79812, 1306, 91010, 94, 1284, 54567, 2702, 54538, 7010, 22846, 2321, 3791, 2335, 8829, 7075, 4223, 80781, 51  
4855, 1282, 8829, 54567, 7048, 23129  
9719, 1282, 3672, 5155, 1284, 50509, 633, 3384, 7450, 3791, 2335, 3680, 3910, 80781  
2701, 2702, 3791, 947  
94, 5155, 26051, 8829, 7010, 3791, 2324, 6369  
5155, 2149, 7293, 2321, 3791, 3479, 2324, 8718  
94, 54567, 22846, 9353, 5797  
8829, 54567, 2321, 3791, 2324  
2702, 26508, 7048, 23129, 64321  
94, 2624, 7010, 358, 6915, 2321, 3791, 7048, 6369, 947  
135, 94, 54567, 4223, 552, 2313  
5155, 8829, 2149, 22846, 7450, 2335  
8322, 7075, 3791, 7048, 64321  
1910, 135, 3764, 3672  
51738, 1284, 7075, 7010, 22846, 2828, 5797  
5155, 8829, 50507, 3479  
1910, 135, 552  
64805, 7450, 2313  
1282, 2321, 2324  
8829, 9353, 5797  
22899, 8322, 8829  
79812, 54567, 4223  
1003, 90952, 4345, 5797, 51294, 27253  
3764, 5155, 2624, 7010, 7048, 2057  
9079, 54538, 3910, 7852, 23129  
2702, 2149, 6915, 552  
94, 54567, 1636, 633  
1281, 1301, 1303, 26585, 6423, 140766, 1805, 4060, 2331, 1277, 1289, 7373, 1278, 4017  
1292, 10516, 1293, 1281, 1291, 22795, 1295, 11117, 1301, 1300, 5054, 7412, 1842, 25903, 10631, 4060, 3678, 1  
1292, 1293, 1281, 4313, 1291, 4312, 1295, 1301, 1300, 1303, 140766, 1277, 1289, 1278, 4323  
4313, 1291, 3678, 1295, 1301, 1303, 4323, 3624  
1292, 1293, 1291, 22795, 1295, 145864, 1805, 10631, 3678, 1289, 22801, 4017, 7045, 2191, 10154, 3671, 7130, 9

3356, 7412, 1281, 5176, 2077, 1490, 1634, 3861, 4017, 3868, 4914, 7043  
1281, 10631, 1277, 1300, 1278, 1303, 145864, 165, 9507, 2200  
1909, 6387, 7412, 4313, 10631, 6649, 7424, 857, 4017, 4323, 7043  
131578, 1634, 127435, 857, 54829  
1292, 1291, 1277, 1278  
1281, 4239, 4053, 1289  
1281, 4313, 1291, 1956, 1277, 1278  
6387, 1281, 10631, 1634, 624, 4323  
4313, 4312, 7177, 7077, 1634, 4323, 9507, 2200  
10516, 7412, 1281, 1842, 25992, 22795, 1490, 22801, 81792  
5737, 10631, 1277, 1490, 2706, 5159  
83729, 8200, 7043, 3624  
4313, 1295, 857, 5054, 51330, 57125, 7070, 7424, 3678, 1490, 2028, 7045, 4323, 2191  
7431, 83729, 8200, 7043, 3624  
1601, 27123, 51339, 3090, 7472, 6423  
4313, 1277, 83716, 7043  
27123, 51339, 3090, 6423  
10848, 3861, 3868  
10631, 1277, 5139, 857, 7472, 2200  
4060, 1277, 83872, 1301, 7078, 7045  
5737, 7292, 1956, 1489, 3082, 2252, 7472, 6423, 26585, 23529, 3356, 150, 57124, 9180, 7424, 1490, 5159  
3671, 5919, 7424, 3082, 2162, 7078, 87, 5054, 7043  
131578, 7070, 1634, 127435, 54829  
7535, 10344, 942, 8741, 8742, 6347, 943, 6348, 944, 6352, 6351, 6357, 6355, 2209, 1521, 29851, 1520, 4689, 7409, 9180, 7424, 1490, 5159  
3127, 941, 942, 940, 10673, 84433, 921, 29851, 151888, 5777, 5133, 959, 3113, 3115, 3117, 3118, 3119, 7409, 9180, 7424, 1490, 5159  
7535, 10344, 3627, 2919, 7124, 6347, 943, 6348, 3683, 9450, 6352, 6351, 3965, 6357, 199, 6355, 414062, 84868, 3113, 3127, 3111, 3115, 3112, 3117, 3118, 3119, 3109, 3108, 3120, 3123, 3122  
10344, 3627, 151306, 84636, 2919, 6347, 6348, 6352, 6351, 1524, 6357, 2857, 6355, 414062, 5777, 7409, 5032, 9180, 7424, 1490, 5159  
10859, 3820, 56253, 10870, 146722, 3903, 27180, 925, 3904, 84433, 3805, 131450, 3683, 342510, 2209, 3106, 84868, 3113, 3127, 3111, 3115, 3112, 3117, 3118, 3119, 972, 5641, 1520, 3109, 3108, 3120, 3123, 3122  
10344, 3627, 2919, 6347, 6348, 6846, 10563, 6352, 6351, 6376, 1524, 6375, 6357, 6373, 6355, 6372, 729230, 414062, 5777, 7409, 5032, 9180, 7424, 1490, 5159  
3113, 959, 3115, 51561, 11151, 5588, 940, 10673, 916, 84433, 3600, 3718, 912, 6352, 6693, 3458, 6363, 199, 10288, 84868, 3113, 3127, 3111, 3115, 3112, 3117, 3118, 3119, 972, 5641, 1520, 3109, 3108, 3120, 3123, 3122  
10344, 3627, 2357, 2919, 6347, 6348, 6352, 3965, 728, 6376, 1524, 6357, 6373, 6355, 6372, 729230, 2833, 2920, 3594, 3113, 10344, 6347, 6348, 6846, 6362, 115362, 6352, 3965, 6351, 6376, 6363, 6375, 6366, 6357, 199, 4261, 3113, 3127, 3111, 3115, 3112, 3117, 3118, 3119, 972, 5641, 1520, 3109, 3108, 3120, 3123, 3122  
4049, 2625, 931, 684, 940, 7124, 6347, 9450, 3458, 54209, 6480, 10148, 3569, 5452, 4068, 5699, 54210, 5133  
10344, 6279, 1441, 7409, 6347, 2921, 6348, 6846, 6280, 6362, 6352, 6351, 3458, 728, 6376, 6375, 6357, 3689, 6355, 6372, 729230, 414062, 5777, 7409, 5032, 9180, 7424, 1490, 5159  
10859, 3127, 3135, 6693, 10288, 84868, 3586, 3559, 5777, 3123, 1493, 11326, 50943  
10344, 4049, 3627, 941, 942, 684, 3606, 6348, 944, 6280, 3600, 6352, 10563, 6351, 6375, 6357, 4050, 6355, 6372, 729230, 414062, 5777, 7409, 5032, 9180, 7424, 1490, 5159  
719, 728, 6363, 51561, 6375, 6366, 1236, 2919, 2920, 2921, 972  
3113, 3127, 3115, 3117, 3135, 3118, 3119, 925, 972, 3458, 1520, 3106, 3109, 2217, 3133, 3105, 30835, 3123, 3127, 941, 942, 7124, 6347, 2672, 57817, 7133, 3394, 929, 1234, 3458, 1524, 7099, 10288, 84868, 4064, 5133, 6352, 929, 7099, 3606, 7124, 6347, 3553, 23643, 6348, 5724, 3055  
3662, 3113, 3127, 3115, 3117, 3135, 3118, 3119, 3394, 5724, 3458, 4261, 2209, 3106, 3134, 3133, 3120, 3105, 3127, 941, 942, 7124, 6347, 2672, 57817, 7133, 3394, 929, 1234, 3458, 1524, 7099, 10288, 84868, 4064, 5133, 6352, 929, 7099, 3606, 7124, 6347, 3553, 23643, 6348, 5724, 3055  
7535, 64170, 2625, 11151, 684, 2268, 3004, 6280, 342510, 9450, 79626, 3106, 84868, 340205, 3133, 54210, 10411, 3627, 2357, 5588, 2919, 2920, 6347, 6348, 409, 4283, 6352, 719, 728, 6376, 6363, 6366, 6357, 6355, 6372, 51411, 7535, 3127, 2625, 940, 84433, 7454, 3458, 5699, 50943, 3113, 3115, 3117, 5588, 3118, 3119, 5705, 915, 5720, 9180, 7424, 1490, 5159  
4332, 3135, 4688, 23643, 3805, 5551, 8302, 4283, 1234, 6693, 728, 10578, 1524,

3113, 3594, 3115, 4049, 51561, 3606, 7124, 916, 3394, 929, 7099, 729230, 84868, 3553, 3105  
10859, 3127, 3965, 6375, 2625, 7099, 84868, 3586, 3123, 50943  
5790, 2625, 1441, 10990, 962, 5032, 9235, 7454, 972, 11025, 4283, 11024, 6376, 11027, 3106, 11262  
10344, 2625, 6347, 57817, 6348, 6846, 6362, 6352, 6351, 6376, 6363, 6375, 6366, 6357, 6368, 6355, 414062, 3569  
10344, 7124, 6347, 9290, 6348, 6846, 972, 6504, 6362, 409, 6352, 6351, 728, 3965, 6363, 6376, 6357, 1236, 6375  
959, 3965, 2625, 5588, 940, 84868, 916, 3133, 50943  
10344, 6347, 6348, 6846, 6362, 6352, 6351, 6363, 6376, 6375, 6366, 6357, 6368, 6355, 414062, 3569  
10859, 3111, 10344, 3627, 3112, 3581, 4354, 2919, 8741, 8742, 6347, 943, 944, 84433, 3683, 9046, 6351, 6357, 6362, 7535, 941, 942, 914, 916, 962, 84174, 925, 7454, 924, 50943  
409, 3965, 7099, 84868, 3586, 2841, 6504, 50943  
6693, 7099, 729230, 7096, 943, 1536  
7535, 941, 940, 10148, 729230, 916  
5551, 6363, 6366, 11151, 81704, 1794  
6362, 10344, 6376, 6363, 6357, 6366, 6368, 6355, 414062, 6347, 6348, 6846  
4283, 3627, 6375, 6373, 5473, 6372, 3569  
64170, 4049, 728, 7124, 84868, 944, 2268, 3133, 3569, 3105, 4069  
4049, 8742, 3004, 944, 6280, 83593, 9450, 3458, 728, 3553, 5777, 3559, 7185, 2833, 2999, 5133, 11040, 6279, 916  
6279, 57817, 3394, 6280, 23166, 10563, 3458, 6693, 10578, 7099, 6372, 5473, 7096, 3586  
929, 3965, 7099, 3689, 23643, 3684  
929, 6693, 7099, 356, 940, 407977, 8742, 916, 23643, 943, 7133, 921  
3965, 6363, 51561, 7099, 3606, 7124, 51284, 3553  
7535, 10859, 56253, 942, 3903, 10990, 924, 8320, 3458, 1520, 84868, 151888, 3133, 10462, 51744, 973, 23495, 1493  
409, 23533, 6363, 3059, 6366, 2625, 1236, 3606, 940, 7124, 6348, 3569  
6375, 2625, 84868, 11326, 50943  
6352, 6376, 1524, 6347, 6348  
10563, 374403, 6366, 1236, 8477  
3627, 4049, 4129, 6279, 2919, 2920, 23643, 2921, 943, 8784, 6403, 10563, 4283, 3965, 728, 1236, 7099, 356, 6375  
959, 3458, 6363, 51561, 3135, 1236, 7099, 3394  
409, 7099, 7124, 84868, 3586, 6504, 50943  
3113, 3115, 5588, 729230, 6347, 3932  
6376, 6279, 3689, 5473, 6347, 6280  
717, 718, 713, 712, 2219, 714  
5551, 3002, 3001, 3004, 2999, 4069  
1089, 929, 3689, 11151, 122618, 201294, 3683, 3394, 6504  
3111, 914, 84433, 3600  
7535, 915, 972, 1794  
929, 7099, 356, 23643  
3458, 7096, 3553, 5724  
4283, 3627, 6373, 2833  
7099, 7124, 51284, 51311  
6363, 6366, 1236, 1794  
3109, 3108, 3123, 3122  
3820, 3627, 940, 10990, 3902, 6347, 27180, 925, 10563, 9046, 3458, 10261, 3559, 2833, 951, 914, 915, 23643, 916  
7099, 5641, 1520, 51284, 7096, 4064, 51311  
929, 56253, 23601, 7124, 2268, 3586  
11314, 4332, 3586, 23495, 1493  
3627, 6373, 58191, 6348, 2833  
3458, 7124, 3553, 7133, 348  
7099, 7124, 84868, 51284, 3569  
3127, 7099, 3606, 10148, 3123  
2357, 914, 51744, 962, 3683, 3684, 972, 6403, 9046, 719, 728, 6693, 9056, 3689, 5777, 3932, 54210  
3662, 3458, 10538, 3586, 3394, 3569, 10077

929, 64170, 7099, 497189, 7124, 23643, 51311  
929, 7099, 51284, 7096, 23643, 51311  
3594, 51561, 6375, 3106, 3133, 3105  
3135, 4689, 4688, 5705, 5720, 5721, 653361, 2209, 3106, 3134, 3133, 1536, 3105, 5699  
657, 22853, 26524, 91, 23043, 90, 9262, 55589, 22858, 1385, 3717, 7042, 9113, 904, 57448, 2534, 7046, 10114, 1  
5717, 80114, 4040, 5708, 9113, 26524, 5706, 10197, 2487, 10213, 5711, 9861, 5700, 5701, 5716  
5717, 5708, 5706, 10197, 5887, 10213, 5711, 9575, 9861, 5700, 5701, 55175, 5716  
5717, 5708, 5706, 10197, 10213, 5711, 9861, 5700, 5701, 5716, 5966  
3570, 1270, 3572, 1271, 3977  
219333, 5717, 7494, 158880, 26133, 5706, 10213, 5701  
5717, 5708, 5706, 10197, 10213, 5711, 3312, 9861, 5700, 5701, 5716  
23228, 5334, 26524, 5577, 23043, 5332, 323, 64759, 3815, 9262, 22858, 3717, 2977, 5576, 2534, 2982, 4649, 704  
5717, 85458, 4040, 5708, 5706, 10197, 10213, 5711, 9861, 5700, 5701, 5716  
5717, 5708, 5706, 10197, 10213, 5711, 9861, 5700, 5701, 5716  
5717, 5708, 5706, 10197, 10213, 5711, 9861, 5700, 5701, 5716  
5717, 5708, 5706, 10197, 10213, 5711, 9861, 5700, 5701, 5716  
5717, 5708, 10082, 5706, 10197, 10213, 5711, 9861, 5700, 5701, 5716  
659, 4208, 7494, 6297, 2033, 9575, 1385, 5978, 4802, 4800, 2957, 904, 2113, 80714, 5966  
22853, 91, 90, 7046, 10114  
659, 4208, 657, 3570, 3572, 90, 338773, 4921  
5717, 5708, 5706, 2033, 10197, 2534, 10213, 5711, 9861, 5700, 5701, 5716  
7253, 4208, 55816, 43, 1271, 2033, 91851, 54510, 7903  
659, 7042, 657, 90, 23414  
8642, 9113, 26524, 79633  
5717, 4208, 5708, 5156, 5706, 10213, 3815, 5711, 9861, 5700, 5701, 5716, 3717, 55816, 4254, 10197, 2534  
5717, 5708, 5706, 50489, 10197, 10213, 5711, 9861, 5700, 5701, 5716, 948  
3306, 3320, 3312, 3326, 3308, 7057  
3688, 9113, 26524, 91, 90  
659, 7042, 90, 23414, 7046  
659, 7042, 657, 91, 90, 7046, 57551  
5717, 5708, 5706, 10197, 10213, 5711, 9861, 5700, 5701, 5716  
146057, 22853, 26524, 7046, 127933, 10114  
146057, 22858, 51762, 79809  
8646, 2534, 5592, 10395  
4208, 7586, 9392, 2033, 91, 323, 65986, 9575, 1385, 55206, 10499, 5978, 55252, 158880, 4802, 4800, 4801, 2957  
9113, 26524, 904, 57448, 3980  
4802, 3320, 51661, 3312, 3326, 821  
657, 3688, 91, 90, 9871, 23414, 7046  
22853, 5156, 91, 23043, 9262, 3815, 127933, 4921, 3717  
4208, 4040, 90, 5994, 9575, 1385, 5978, 1389, 4800, 3454, 4801, 2113, 7046, 10746, 80714  
10197, 90, 57448, 7046, 7057  
7042, 85458, 10395, 93663, 9475  
659, 445815, 91, 90, 11217  
659, 8646, 657, 90  
7253, 9113, 26524, 2690  
10550, 5978, 3688, 8633, 9113, 26524, 2487, 323, 133746, 1385, 1545, 10687  
5717, 5708, 5706, 10197, 10213, 5711, 9861, 5700, 5701, 5716  
55252, 7494, 1389, 2487, 1385  
3688, 2033, 22858, 1875, 3312  
4208, 4040, 2487  
659, 7042, 657

657, 1832, 7046  
3320, 9113, 3312  
657, 5887, 23414  
659, 657, 90  
5706, 1385, 5700, 5701  
3320, 2033, 3312, 3326  
7042, 4208, 7494, 1270  
85458, 6801, 4040, 23043, 2487, 8840  
659, 4208, 657, 6546, 90, 338773  
7042, 4208, 657, 4040, 7046  
287, 4040, 8642, 23043, 51735  
3430, 10410, 8519, 3136, 6772, 4599, 8638, 5696, 4938, 4939, 3433, 3429, 3437, 6672, 3455, 3107, 3659, 3669, 9111, 10346, 64135, 10410, 8519, 3592, 4599, 8638, 3460, 4938, 4939, 10561, 3433, 3437, 3455, 3669, 23586, 3665, 9111, 10346, 10410, 8519, 2633, 6772, 4599, 8638, 5371, 10964, 60489, 4938, 4939, 3433, 3437, 3455, 3659, 200315, 4938, 10410, 8519, 4599, 200315, 3669, 8638, 60489, 91543, 4940  
5719, 26270, 55008, 5709, 6737, 5704, 5710, 5702, 5713, 5714, 5698, 5696  
811, 3136, 3107, 6891, 6892, 567, 3077, 6890, 3140  
5719, 3136, 5709, 3107, 5704, 5710, 5702, 567, 5713, 5714, 5698, 5696  
5719, 115908, 5709, 5704, 5710, 5702, 5713, 5714, 5698, 5696  
5719, 5709, 5704, 5710, 5702, 5713, 5714, 5698, 5696  
5719, 5709, 5704, 5710, 5702, 5713, 5714, 5698, 5696  
5719, 5709, 5704, 5710, 5702, 5713, 5714, 5698, 5696  
5719, 5709, 5704, 5710, 5702, 5713, 5714, 5698, 5696  
5719, 5709, 5704, 5710, 5702, 2205, 5713, 5714, 4067, 5698, 5696  
5719, 5709, 5704, 5710, 5702, 5371, 5713, 5714, 5698, 5696  
5719, 5709, 5704, 5710, 5702, 5713, 5714, 5698, 5696  
5719, 5709, 5704, 5710, 5702, 5713, 5714, 5698, 5696  
5719, 5709, 5704, 5710, 5702, 5713, 5714, 4067, 5698, 5696  
5719, 5709, 5704, 5710, 5702, 5713, 5714, 5698, 5696  
5719, 115908, 5709, 5704, 5710, 5702, 5713, 5714, 5698, 5696  
10410, 8519, 6772, 3455  
6891, 6892, 567, 6890  
64135, 3659, 23586, 3665  
811, 7051, 6737, 2323  
5719, 5709, 6772, 5704, 5710, 5702, 5713, 5714, 4982, 8995, 5698, 5696  
10410, 6672, 6737  
6772, 9111, 3455, 6776, 3601  
64135, 6672, 5371  
64135, 23586, 3665  
10410, 8519, 3455  
6891, 567, 6890

| List Total | Pop Hits | Pop Total | Fold Enrich | Bonferroni  | Benjamini   | FDR      |
|------------|----------|-----------|-------------|-------------|-------------|----------|
| 164        | 11       | 1786      | 5.940133    | 8.78E-01    | 8.78E-01    | 2.79E+00 |
| 164        | 12       | 1786      | 5.445122    | 9.65E-01    | 8.12E-01    | 4.40E+00 |
| 164        | 6        | 1786      | 7.260163    | 1.00E+00    | 9.92E-01    | 1.79E+01 |
| 164        | 67       | 1786      | 2.113032    | 1.00E+00    | 9.91E-01    | 2.23E+01 |
| 164        | 31       | 1786      | 2.810386    | 1           | 9.89E-01    | 2.61E+01 |
| 164        | 7        | 1786      | 6.222997    | 1           | 9.82E-01    | 27.67188 |
| 164        | 42       | 1786      | 2.333624    | 1           | 0.996451504 | 41.23431 |
| 164        | 35       | 1786      | 2.489199    | 1           | 0.995091783 | 43.59545 |
| 164        | 15       | 1786      | 3.630081    | 1           | 0.996277161 | 49.22114 |
| 164        | 9        | 1786      | 4.840108    | 1           | 0.993874466 | 49.63879 |
| 164        | 29       | 1786      | 2.62868     | 1           | 0.991382743 | 50.53979 |
| 164        | 22       | 1786      | 2.970067    | 1           | 0.988527749 | 51.41096 |
| 164        | 4        | 1786      | 8.167683    | 1           | 0.98422303  | 51.62359 |
| 274        | 14       | 1786      | 3.259124    | 0.999999934 | 0.999999934 | 18.34604 |
| 274        | 9        | 1786      | 3.621249    | 1           | 1           | 44.91391 |
| 274        | 6        | 1786      | 4.345499    | 1           | 1           | 56.43022 |
| 274        | 14       | 1786      | 2.793535    | 1           | 0.999999957 | 56.4539  |
| 274        | 14       | 1786      | 2.793535    | 1           | 0.999999957 | 56.4539  |
| 274        | 14       | 1786      | 2.793535    | 1           | 0.999999957 | 56.4539  |
| 127        | 69       | 1786      | 4.280041    | 1.51E-05    | 1.51E-05    | 2.13E-05 |
| 127        | 11       | 1786      | 7.670723    | 0.453095607 | 0.260470154 | 0.8461   |
| 127        | 73       | 1786      | 2.697012    | 0.770884849 | 0.388094153 | 2.053352 |
| 127        | 4        | 1786      | 14.06299    | 0.773976081 | 0.310493126 | 2.072083 |
| 127        | 26       | 1786      | 4.327075    | 0.83213221  | 0.300168519 | 2.481375 |
| 127        | 27       | 1786      | 4.166812    | 0.896718883 | 0.315032203 | 3.146025 |
| 127        | 9        | 1786      | 7.812773    | 0.923890608 | 0.307841646 | 3.561446 |
| 127        | 9        | 1786      | 7.812773    | 0.923890608 | 0.307841646 | 3.561446 |
| 127        | 10       | 1786      | 7.031496    | 0.982795007 | 0.398193584 | 5.559544 |
| 127        | 47       | 1786      | 2.992126    | 0.993867802 | 0.432220678 | 6.921428 |
| 127        | 17       | 1786      | 4.963409    | 0.996765771 | 0.436392087 | 7.756099 |
| 127        | 17       | 1786      | 4.963409    | 0.996765771 | 0.436392087 | 7.756099 |
| 127        | 11       | 1786      | 6.392269    | 0.997627683 | 0.422729527 | 8.157748 |
| 127        | 6        | 1786      | 9.375328    | 0.998775086 | 0.428070994 | 9.008542 |
| 127        | 25       | 1786      | 3.937638    | 0.999308433 | 0.428639352 | 9.737995 |
| 127        | 7        | 1786      | 8.035996    | 0.999985683 | 0.549194896 | 14.53379 |
| 127        | 3        | 1786      | 14.06299    | 0.999999912 | 0.661362716 | 20.44267 |
| 127        | 3        | 1786      | 14.06299    | 0.999999912 | 0.661362716 | 20.44267 |
| 127        | 4        | 1786      | 10.54724    | 1           | 0.857645633 | 35.54274 |
| 127        | 4        | 1786      | 10.54724    | 1           | 0.857645633 | 35.54274 |
| 127        | 4        | 1786      | 10.54724    | 1           | 0.857645633 | 35.54274 |
| 127        | 4        | 1786      | 10.54724    | 1           | 0.857645633 | 35.54274 |
| 127        | 26       | 1786      | 3.245306    | 1           | 0.886739944 | 40.62763 |
| 127        | 26       | 1786      | 3.245306    | 1           | 0.886739944 | 40.62763 |
| 127        | 18       | 1786      | 3.906387    | 1           | 0.883225054 | 41.97306 |
| 127        | 12       | 1786      | 4.687664    | 1           | 0.944964568 | 53.96401 |
| 127        | 12       | 1786      | 4.687664    | 1           | 0.944964568 | 53.96401 |
| 181        | 21       | 1786      | 6.578269    | 8.90E-06    | 8.90E-06    | 1.18E-05 |
| 181        | 73       | 1786      | 3.514418    | 9.82E-06    | 4.91E-06    | 1.30E-05 |
| 181        | 32       | 1786      | 4.625345    | 7.77E-04    | 2.59E-04    | 0.001028 |
| 181        | 13       | 1786      | 6.072248    | 0.110724801 | 0.028910977 | 0.155034 |
| 181        | 138      | 1786      | 2.002082    | 0.335177484 | 0.078402806 | 0.538302 |



|     |     |      |          |             |             |          |
|-----|-----|------|----------|-------------|-------------|----------|
| 181 | 37  | 1786 | 3.200239 | 0.554726477 | 0.126148146 | 1.064022 |
| 181 | 28  | 1786 | 3.524073 | 0.744826773 | 0.177260861 | 1.789629 |
| 181 | 36  | 1786 | 3.01504  | 0.921536084 | 0.272498744 | 3.309087 |
| 181 | 7   | 1786 | 7.048145 | 0.965366778 | 0.31178928  | 4.348978 |
| 181 | 4   | 1786 | 9.867403 | 0.989801901 | 0.367803739 | 5.882747 |
| 181 | 4   | 1786 | 9.867403 | 0.989801901 | 0.367803739 | 5.882747 |
| 181 | 13  | 1786 | 4.554186 | 0.999645477 | 0.514341151 | 9.971412 |
| 181 | 14  | 1786 | 4.228887 | 0.999988587 | 0.612637375 | 13.96987 |
| 181 | 25  | 1786 | 3.157569 | 0.999990161 | 0.588050691 | 14.13849 |
| 181 | 32  | 1786 | 2.775207 | 0.999999282 | 0.635962436 | 17.05953 |
| 181 | 15  | 1786 | 3.946961 | 0.999999853 | 0.649591485 | 18.77728 |
| 181 | 6   | 1786 | 6.578269 | 0.999999997 | 0.709644236 | 23.01884 |
| 181 | 69  | 1786 | 2.002082 | 1           | 0.716701372 | 24.68498 |
| 181 | 11  | 1786 | 4.485183 | 1           | 0.723085661 | 26.33122 |
| 181 | 17  | 1786 | 3.482613 | 1           | 0.765724165 | 30.55071 |
| 181 | 7   | 1786 | 5.638516 | 1           | 0.800611062 | 34.71443 |
| 181 | 7   | 1786 | 5.638516 | 1           | 0.800611062 | 34.71443 |
| 181 | 3   | 1786 | 9.867403 | 1           | 0.812915334 | 37.21191 |
| 181 | 18  | 1786 | 3.289134 | 1           | 0.79857603  | 37.25463 |
| 181 | 18  | 1786 | 3.289134 | 1           | 0.79857603  | 37.25463 |
| 181 | 101 | 1786 | 1.66085  | 1           | 0.892727901 | 49.28085 |
| 181 | 40  | 1786 | 2.220166 | 1           | 0.88653034  | 49.87046 |
| 181 | 14  | 1786 | 3.524073 | 1           | 0.893067606 | 52.23834 |
| 358 | 242 | 1786 | 2.19E+00 | 2.06E-16    | 2.06E-16    | 1.94E-16 |
| 358 | 43  | 1786 | 3.36E+00 | 1.50E-07    | 7.52E-08    | 1.42E-07 |
| 358 | 192 | 1786 | 1.90E+00 | 2.95E-06    | 9.85E-07    | 2.79E-06 |
| 358 | 13  | 1786 | 4.988827 | 6.73E-05    | 1.68E-05    | 6.34E-05 |
| 358 | 142 | 1786 | 1.967425 | 9.85E-05    | 1.97E-05    | 9.29E-05 |
| 358 | 91  | 1786 | 2.247713 | 1.43E-04    | 2.38E-05    | 1.35E-04 |
| 358 | 62  | 1786 | 2.494413 | 5.25E-04    | 7.50E-05    | 4.95E-04 |
| 358 | 41  | 1786 | 2.79861  | 0.002372205 | 2.97E-04    | 0.00224  |
| 358 | 69  | 1786 | 2.313659 | 0.002610203 | 2.90E-04    | 0.002465 |
| 358 | 37  | 1786 | 2.831496 | 0.006336266 | 6.35E-04    | 0.005994 |
| 358 | 24  | 1786 | 3.325885 | 0.009963603 | 9.10E-04    | 0.009442 |
| 358 | 30  | 1786 | 2.993296 | 0.015127591 | 0.001269459 | 0.014373 |
| 358 | 49  | 1786 | 2.443507 | 0.026071657 | 0.002030056 | 0.024908 |
| 358 | 18  | 1786 | 3.603042 | 0.035189235 | 0.002555536 | 0.033774 |
| 358 | 91  | 1786 | 1.973602 | 0.039525854 | 0.002684937 | 0.038021 |
| 358 | 14  | 1786 | 3.919792 | 0.073147541 | 0.004736304 | 0.071603 |
| 358 | 37  | 1786 | 2.56183  | 0.121859845 | 0.007614921 | 0.122462 |
| 358 | 47  | 1786 | 2.335196 | 0.145733823 | 0.008712516 | 0.148418 |
| 358 | 15  | 1786 | 3.658473 | 0.171083405 | 0.009826962 | 0.176777 |
| 358 | 46  | 1786 | 2.277508 | 0.3093488   | 0.018335833 | 0.348402 |
| 358 | 131 | 1786 | 1.675636 | 0.32754065  | 0.018718478 | 0.373481 |
| 358 | 40  | 1786 | 2.369693 | 0.3677225   | 0.020621984 | 0.431347 |
| 358 | 69  | 1786 | 1.95215  | 0.509442063 | 0.030491207 | 0.669339 |
| 358 | 39  | 1786 | 2.302535 | 0.661149203 | 0.044089964 | 1.015281 |
| 358 | 10  | 1786 | 3.991061 | 0.775584251 | 0.058019021 | 1.399147 |
| 358 | 21  | 1786 | 2.850758 | 0.800660661 | 0.060144105 | 1.509255 |
| 358 | 51  | 1786 | 2.054223 | 0.84843335  | 0.067493244 | 1.763384 |
| 358 | 34  | 1786 | 2.347683 | 0.859077255 | 0.067590977 | 1.83081  |
| 358 | 8   | 1786 | 4.365223 | 0.883535835 | 0.071461886 | 2.007116 |

|     |     |      |          |             |             |          |
|-----|-----|------|----------|-------------|-------------|----------|
| 358 | 31  | 1786 | 2.413948 | 0.886247185 | 0.069894801 | 2.02888  |
| 358 | 16  | 1786 | 3.118017 | 0.918880454 | 0.077831039 | 2.340734 |
| 358 | 35  | 1786 | 2.280607 | 0.940149243 | 0.084236296 | 2.620348 |
| 358 | 42  | 1786 | 2.138069 | 0.94922835  | 0.086357271 | 2.771298 |
| 358 | 76  | 1786 | 1.772346 | 0.978355991 | 0.106613585 | 3.549863 |
| 358 | 14  | 1786 | 3.207103 | 0.983906317 | 0.111286895 | 3.81897  |
| 358 | 37  | 1786 | 2.157331 | 0.995826795 | 0.14118042  | 5.035364 |
| 358 | 264 | 1786 | 1.341692 | 0.997185316 | 0.146770882 | 5.387381 |
| 358 | 24  | 1786 | 2.494413 | 0.998321093 | 0.154771013 | 5.847247 |
| 358 | 12  | 1786 | 3.325885 | 0.998884211 | 0.15996578  | 6.209297 |
| 358 | 7   | 1786 | 4.276137 | 0.999741467 | 0.186583613 | 7.49369  |
| 358 | 7   | 1786 | 4.276137 | 0.999741467 | 0.186583613 | 7.49369  |
| 358 | 7   | 1786 | 4.276137 | 0.999741467 | 0.186583613 | 7.49369  |
| 358 | 25  | 1786 | 2.394637 | 0.999918454 | 0.205162926 | 8.494745 |
| 358 | 10  | 1786 | 3.492179 | 0.999986433 | 0.234215824 | 10.02933 |
| 358 | 23  | 1786 | 2.385961 | 0.999999787 | 0.30043635  | 13.48698 |
| 358 | 88  | 1786 | 1.587354 | 0.999999974 | 0.327824392 | 15.19491 |
| 358 | 34  | 1786 | 2.054223 | 0.999999989 | 0.334849042 | 15.88777 |
| 358 | 8   | 1786 | 3.74162  | 0.999999991 | 0.330999435 | 16.00055 |
| 358 | 27  | 1786 | 2.217256 | 0.999999993 | 0.329474994 | 16.23388 |
| 358 | 14  | 1786 | 2.850758 | 0.999999999 | 0.346365185 | 17.5071  |
| 358 | 89  | 1786 | 1.569519 | 0.999999999 | 0.342681615 | 17.62357 |
| 358 | 28  | 1786 | 2.138069 | 1           | 0.400541191 | 21.43708 |
| 358 | 6   | 1786 | 4.157356 | 1           | 0.449349132 | 24.94415 |
| 358 | 6   | 1786 | 4.157356 | 1           | 0.449349132 | 24.94415 |
| 358 | 6   | 1786 | 4.157356 | 1           | 0.449349132 | 24.94415 |
| 358 | 67  | 1786 | 1.638122 | 1           | 0.443408746 | 24.97153 |
| 358 | 15  | 1786 | 2.660708 | 1           | 0.452535794 | 25.99894 |
| 358 | 12  | 1786 | 2.910149 | 1           | 0.472407156 | 27.79046 |
| 358 | 9   | 1786 | 3.325885 | 1           | 0.471004512 | 28.12564 |
| 358 | 9   | 1786 | 3.325885 | 1           | 0.471004512 | 28.12564 |
| 358 | 9   | 1786 | 3.325885 | 1           | 0.471004512 | 28.12564 |
| 358 | 9   | 1786 | 3.325885 | 1           | 0.471004512 | 28.12564 |
| 358 | 19  | 1786 | 2.363128 | 1           | 0.52015134  | 32.14152 |
| 358 | 4   | 1786 | 4.988827 | 1           | 0.578968257 | 37.18355 |
| 358 | 4   | 1786 | 4.988827 | 1           | 0.578968257 | 37.18355 |
| 358 | 4   | 1786 | 4.988827 | 1           | 0.578968257 | 37.18355 |
| 358 | 4   | 1786 | 4.988827 | 1           | 0.578968257 | 37.18355 |
| 358 | 4   | 1786 | 4.988827 | 1           | 0.578968257 | 37.18355 |
| 358 | 4   | 1786 | 4.988827 | 1           | 0.578968257 | 37.18355 |
| 358 | 4   | 1786 | 4.988827 | 1           | 0.578968257 | 37.18355 |
| 358 | 4   | 1786 | 4.988827 | 1           | 0.578968257 | 37.18355 |
| 358 | 95  | 1786 | 1.470391 | 1           | 0.575273626 | 37.39543 |
| 358 | 13  | 1786 | 2.686291 | 1           | 0.598542127 | 39.81534 |
| 358 | 10  | 1786 | 2.993296 | 1           | 0.626912349 | 42.75467 |
| 358 | 7   | 1786 | 3.563448 | 1           | 0.628599048 | 43.43204 |
| 358 | 7   | 1786 | 3.563448 | 1           | 0.628599048 | 43.43204 |
| 358 | 7   | 1786 | 3.563448 | 1           | 0.628599048 | 43.43204 |
| 358 | 7   | 1786 | 3.563448 | 1           | 0.628599048 | 43.43204 |
| 358 | 7   | 1786 | 3.563448 | 1           | 0.628599048 | 43.43204 |
| 358 | 51  | 1786 | 1.662942 | 1           | 0.639185129 | 44.89741 |
| 358 | 14  | 1786 | 2.494413 | 1           | 0.716155655 | 52.67472 |

|     |    |      |          |             |             |          |
|-----|----|------|----------|-------------|-------------|----------|
| 358 | 14 | 1786 | 2.494413 | 1           | 0.716155655 | 52.67472 |
| 358 | 11 | 1786 | 2.721178 | 1           | 0.762184925 | 57.96968 |
| 358 | 11 | 1786 | 2.721178 | 1           | 0.762184925 | 57.96968 |
| 358 | 41 | 1786 | 1.703502 | 1           | 0.757547216 | 58.0413  |
| 218 | 61 | 1786 | 2.95473  | 0.005311335 | 0.005311335 | 0.00557  |
| 218 | 41 | 1786 | 2.997315 | 0.2442855   | 0.130681589 | 0.292544 |
| 218 | 33 | 1786 | 3.227412 | 0.344226517 | 0.131203724 | 0.440373 |
| 218 | 27 | 1786 | 3.337751 | 0.693791641 | 0.25611764  | 1.230288 |
| 218 | 5  | 1786 | 8.192661 | 0.785694099 | 0.265136248 | 1.598282 |
| 218 | 15 | 1786 | 4.369419 | 0.788307964 | 0.227999787 | 1.610912 |
| 218 | 28 | 1786 | 3.218545 | 0.807620638 | 0.209800181 | 1.709314 |
| 218 | 64 | 1786 | 2.304186 | 0.814831634 | 0.190073052 | 1.748584 |
| 218 | 33 | 1786 | 2.979149 | 0.833603929 | 0.1806672   | 1.858378 |
| 218 | 24 | 1786 | 3.413609 | 0.862235526 | 0.179811409 | 2.052026 |
| 218 | 24 | 1786 | 3.413609 | 0.862235526 | 0.179811409 | 2.052026 |
| 218 | 24 | 1786 | 3.413609 | 0.862235526 | 0.179811409 | 2.052026 |
| 218 | 24 | 1786 | 3.413609 | 0.862235526 | 0.179811409 | 2.052026 |
| 218 | 29 | 1786 | 3.107561 | 0.894895319 | 0.185189624 | 2.328859 |
| 218 | 52 | 1786 | 2.363267 | 0.983197681 | 0.288599604 | 4.184111 |
| 218 | 6  | 1786 | 6.827217 | 0.984768236 | 0.275211065 | 4.282413 |
| 218 | 19 | 1786 | 3.449541 | 0.999639778 | 0.432402134 | 7.958846 |
| 218 | 39 | 1786 | 2.520819 | 0.999663484 | 0.413231183 | 8.024362 |
| 218 | 24 | 1786 | 3.072248 | 0.999830968 | 0.418903841 | 8.684415 |
| 218 | 7  | 1786 | 5.8519   | 0.999856657 | 0.405838543 | 8.841733 |
| 218 | 4  | 1786 | 8.192661 | 0.9999683   | 0.437582791 | 10.26922 |
| 218 | 69 | 1786 | 2.018482 | 0.999973623 | 0.425867837 | 10.44157 |
| 218 | 41 | 1786 | 2.397852 | 0.999994437 | 0.453908755 | 11.88773 |
| 218 | 12 | 1786 | 4.09633  | 0.999999847 | 0.52629778  | 15.13626 |
| 218 | 8  | 1786 | 5.120413 | 0.999999895 | 0.518193355 | 15.46757 |
| 218 | 8  | 1786 | 5.120413 | 0.999999895 | 0.518193355 | 15.46757 |
| 218 | 17 | 1786 | 3.373448 | 0.999999993 | 0.558300434 | 17.84662 |
| 218 | 33 | 1786 | 2.482624 | 1           | 0.600348882 | 20.56591 |
| 218 | 13 | 1786 | 3.781228 | 1           | 0.602637771 | 21.44239 |
| 218 | 5  | 1786 | 6.554128 | 1           | 0.597773545 | 21.93923 |
| 218 | 5  | 1786 | 6.554128 | 1           | 0.597773545 | 21.93923 |
| 218 | 94 | 1786 | 1.743119 | 1           | 0.5868576   | 22.09239 |
| 218 | 9  | 1786 | 4.551478 | 1           | 0.608818428 | 24.03442 |
| 218 | 14 | 1786 | 3.51114  | 1           | 0.67405742  | 28.82662 |
| 218 | 19 | 1786 | 3.018349 | 1           | 0.673697244 | 29.63194 |
| 218 | 30 | 1786 | 2.457798 | 1           | 0.692431407 | 31.77217 |
| 218 | 66 | 1786 | 1.861968 | 1           | 0.693154889 | 32.66154 |
| 218 | 10 | 1786 | 4.09633  | 1           | 0.701239192 | 34.09872 |
| 218 | 10 | 1786 | 4.09633  | 1           | 0.701239192 | 34.09872 |
| 218 | 10 | 1786 | 4.09633  | 1           | 0.701239192 | 34.09872 |
| 218 | 6  | 1786 | 5.461774 | 1           | 0.72109798  | 36.49876 |
| 218 | 6  | 1786 | 5.461774 | 1           | 0.72109798  | 36.49876 |
| 218 | 49 | 1786 | 2.006366 | 1           | 0.737278701 | 38.69736 |
| 218 | 38 | 1786 | 2.155963 | 1           | 0.781357775 | 43.58787 |
| 218 | 11 | 1786 | 3.723937 | 1           | 0.786402718 | 44.97722 |
| 218 | 11 | 1786 | 3.723937 | 1           | 0.786402718 | 44.97722 |
| 218 | 3  | 1786 | 8.192661 | 1           | 0.825294542 | 50.01557 |
| 218 | 3  | 1786 | 8.192661 | 1           | 0.825294542 | 50.01557 |

|     |    |      |          |             |             |          |
|-----|----|------|----------|-------------|-------------|----------|
| 218 | 3  | 1786 | 8.192661 | 1           | 0.825294542 | 50.01557 |
| 218 | 3  | 1786 | 8.192661 | 1           | 0.825294542 | 50.01557 |
| 218 | 3  | 1786 | 8.192661 | 1           | 0.825294542 | 50.01557 |
| 218 | 3  | 1786 | 8.192661 | 1           | 0.825294542 | 50.01557 |
| 218 | 7  | 1786 | 4.68152  | 1           | 0.833152024 | 51.83224 |
| 218 | 7  | 1786 | 4.68152  | 1           | 0.833152024 | 51.83224 |
| 218 | 7  | 1786 | 4.68152  | 1           | 0.833152024 | 51.83224 |
| 218 | 17 | 1786 | 2.891527 | 1           | 0.847327679 | 54.45    |
| 218 | 17 | 1786 | 2.891527 | 1           | 0.847327679 | 54.45    |
| 218 | 12 | 1786 | 3.413609 | 1           | 0.851655498 | 55.88414 |
| 218 | 12 | 1786 | 3.413609 | 1           | 0.851655498 | 55.88414 |
| 139 | 39 | 1786 | 6.91865  | 2.65E-10    | 2.65E-10    | 4.62E-10 |
| 139 | 49 | 1786 | 4.982235 | 4.29E-06    | 2.14E-06    | 7.48E-06 |
| 139 | 64 | 1786 | 4.216052 | 1.43E-05    | 4.76E-06    | 2.49E-05 |
| 139 | 46 | 1786 | 4.748514 | 8.21E-05    | 2.05E-05    | 1.43E-04 |
| 139 | 16 | 1786 | 8.030576 | 4.89E-04    | 9.77E-05    | 8.52E-04 |
| 139 | 33 | 1786 | 4.672335 | 0.015484578 | 0.002597573 | 0.027209 |
| 139 | 22 | 1786 | 5.256377 | 0.110685178 | 0.016618081 | 0.20434  |
| 139 | 41 | 1786 | 3.76066  | 0.137721303 | 0.018351613 | 0.25805  |
| 139 | 29 | 1786 | 4.430662 | 0.163320732 | 0.019617737 | 0.310454 |
| 139 | 24 | 1786 | 4.818345 | 0.210297292 | 0.023333334 | 0.410852 |
| 139 | 24 | 1786 | 4.818345 | 0.210297292 | 0.023333334 | 0.410852 |
| 139 | 24 | 1786 | 4.818345 | 0.210297292 | 0.023333334 | 0.410852 |
| 139 | 24 | 1786 | 4.818345 | 0.210297292 | 0.023333334 | 0.410852 |
| 139 | 38 | 1786 | 3.719424 | 0.298145699 | 0.031672086 | 0.615439 |
| 139 | 33 | 1786 | 3.893612 | 0.408501256 | 0.042814409 | 0.911459 |
| 139 | 27 | 1786 | 4.282974 | 0.442135096 | 0.043902387 | 1.012561 |
| 139 | 28 | 1786 | 4.13001  | 0.534456858 | 0.053146361 | 1.324341 |
| 139 | 39 | 1786 | 3.294595 | 0.855158538 | 0.120856991 | 3.313013 |
| 139 | 33 | 1786 | 3.504251 | 0.913907611 | 0.142102707 | 4.186128 |
| 139 | 41 | 1786 | 3.133883 | 0.938943881 | 0.151655388 | 4.758531 |
| 139 | 6  | 1786 | 8.565947 | 0.998892533 | 0.31483343  | 11.19031 |
| 139 | 7  | 1786 | 7.34224  | 0.999987238 | 0.447393459 | 17.84028 |
| 139 | 7  | 1786 | 7.34224  | 0.999987238 | 0.447393459 | 17.84028 |
| 139 | 7  | 1786 | 7.34224  | 0.999987238 | 0.447393459 | 17.84028 |
| 139 | 69 | 1786 | 2.234595 | 0.999997803 | 0.478695371 | 20.32256 |
| 139 | 3  | 1786 | 12.84892 | 0.999999752 | 0.515300332 | 23.295   |
| 139 | 14 | 1786 | 4.5889   | 0.999999945 | 0.532307569 | 25.28838 |
| 139 | 4  | 1786 | 9.636691 | 1           | 0.717895517 | 39.80237 |
| 139 | 4  | 1786 | 9.636691 | 1           | 0.717895517 | 39.80237 |
| 139 | 4  | 1786 | 9.636691 | 1           | 0.717895517 | 39.80237 |
| 139 | 4  | 1786 | 9.636691 | 1           | 0.717895517 | 39.80237 |
