# Supplementary material for: Analysis of Immune Gene Expression Subtypes Reveals Osteosarcoma Immune Heterogeneity
Source: Hindawi journal article supplement (doi:10.1155/2021/6649412), 2021-03-01
Supplement: f1 [file 6649412.f1.zip]

| GeneSymbol | GeneID |
|------------|--------|
| A2M        | 2      |
| ABCA6      | 23460  |
| ABCA8      | 10351  |
| ABCA9      | 10350  |
| ABCB1      | 5243   |
| ABCC9      | 10060  |
| ABCD2      | 225    |
| ABI3       | 51225  |
| ABI3BP     | 25890  |
| ACAP1      | 9744   |
| ACE        | 1636   |
| ACHE       | 43     |
| ACOXL      | 55289  |
| ACP5       | 54     |
| ACSL5      | 51703  |
| ACSM5      | 54988  |
| ACSS3      | 79611  |
| ACTA2      | 59     |
| ACTN1      | 87     |
| ACVR1      | 90     |
| ACVR1B     | 91     |
| ACVR2A     | 92     |
| ACVR2B     | 93     |
| ACVRL1     | 94     |
| ADAM12     | 8038   |
| ADAM28     | 10863  |
| ADAM6      | 8755   |
| ADAM8      | 101    |
| ADAMDEC1   | 27299  |
| ADAMTS10   | 81794  |
| ADAMTS12   | 81792  |
| ADAMTS14   | 140766 |
| ADAMTS16   | 170690 |
| ADAMTS2    | 9509   |
| ADAMTS4    | 9507   |
| ADAMTS5    | 11096  |
| ADAMTS9    | 56999  |
| ADAMTSL2   | 9719   |
| ADAP2      | 55803  |
| ADAT1      | 23536  |
| ADCY4      | 196883 |
| ADCYAP1    | 116    |
| ADORA2A    | 135    |
| ADORA3     | 140    |
| ADPRH      | 141    |
| ADRA2A     | 150    |
| ADRM1      | 11047  |
| AEBP1      | 165    |
| AFF3       | 3899   |
| AGAP2      | 116986 |
| AGTR1      | 185    |

|            |        |
|------------|--------|
| AHCYL2     | 23382  |
| AIF1       | 199    |
| CRYBG2     | 55057  |
| AIM2       | 9447   |
| AKAP12     | 9590   |
| AKAP2      | 11217  |
| AKAP5      | 9495   |
| AKNA       | 80709  |
| ALDH1A1    | 216    |
| ALDH3B1    | 221    |
| ALOX5      | 240    |
| ALOX5AP    | 241    |
| ALOXE3     | 59344  |
| ALPK2      | 115701 |
| AMH        | 268    |
| AMHR2      | 269    |
| JAML       | 120425 |
| AMIGO3     | 386724 |
| AMPD1      | 270    |
| AMPH       | 273    |
| ANGPTL1    | 9068   |
| ANGPTL2    | 23452  |
| ANK2       | 287    |
| ANKRD17    | 26057  |
| ANKRD22    | 118932 |
| ANKRD36BP1 | 84832  |
| ANKRD44    | 91526  |
| ANKRD55    | 79722  |
| SOWAHD     | 347454 |
| ANO6       | 196527 |
| ANTXR1     | 84168  |
| ANTXR2     | 118429 |
| ANXA6      | 309    |
| AOAH       | 313    |
| AOC3       | 8639   |
| AP1S2      | 8905   |
| AP3B1      | 8546   |
| APBB1IP    | 54518  |
| APBB2      | 323    |
| APLNR      | 187    |
| APOBR      | 55911  |
| APOBEC3A   | 200315 |
| APOBEC3D   | 140564 |
| APOBEC3G   | 60489  |
| APOBEC3H   | 164668 |
| APOC1      | 341    |
| APOC2      | 344    |
| APOE       | 348    |
| APOL3      | 80833  |
| APOL6      | 80830  |
| AQP10      | 89872  |
| AQP1       | 358    |

|          |        |
|----------|--------|
| AQP9     | 366    |
| AREG     | 374    |
| ARHGAP15 | 55843  |
| ARHGAP18 | 93663  |
| ARHGAP22 | 58504  |
| ARHGAP25 | 9938   |
| ARHGAP30 | 257106 |
| ARHGAP31 | 57514  |
| ARHGAP4  | 393    |
| ARHGAP6  | 395    |
| ARHGAP9  | 64333  |
| ARHGDIB  | 397    |
| ARHGEF15 | 22899  |
| ARHGEF37 | 389337 |
| ARHGEF6  | 9459   |
| ARID5A   | 10865  |
| ARL6IP5  | 10550  |
| ARRB1    | 408    |
| ARRB2    | 409    |
| ARRDC5   | 645432 |
| ARSB     | 411    |
| ART4     | 420    |
| ASAH1    | 427    |
| CLMP     | 79827  |
| ASGR2    | 433    |
| ASPN     | 54829  |
| ASRGL1   | 80150  |
| ASXL2    | 55252  |
| ASXL3    | 80816  |
| ATE1     | 11101  |
| ATP10A   | 57194  |
| ATP2A3   | 489    |
| ATP8A1   | 10396  |
| ATP8B4   | 79895  |
| AVPR1A   | 552    |
| AZGP1    | 563    |
| B2M      | 567    |
| B3GAT1   | 27087  |
| BANK1    | 55024  |
| BATF     | 10538  |
| BATF2    | 116071 |
| BATF3    | 55509  |
| BCL2A1   | 597    |
| BCL2L14  | 79370  |
| BCL6B    | 255877 |
| BDKRB2   | 624    |
| BEND5    | 79656  |
| BEX5     | 340542 |
| BFSP2    | 8419   |
| BGN      | 633    |
| BHLHA15  | 168620 |
| BHLHE22  | 27319  |

|            |        |
|------------|--------|
| BHLHE41    | 79365  |
| BICC1      | 80114  |
| BIN2       | 51411  |
| BIRC6      | 57448  |
| BLK        | 640    |
| BMP2       | 650    |
| BMP2K      | 55589  |
| BMP7       | 655    |
| BMPR1A     | 657    |
| BMPR1B     | 658    |
| BMPR2      | 659    |
| BNC2       | 54796  |
| BST1       | 683    |
| BST2       | 684    |
| BTK        | 695    |
| BTLA       | 151888 |
| BTN2A2     | 10385  |
| BTN3A1     | 11119  |
| BTN3A2     | 11118  |
| BTN3A3     | 10384  |
| C10orf128  | 170371 |
| VSIR       | 64115  |
| VSTM4      | 196740 |
| C10orf99   | 387695 |
| C11orf21   | 29125  |
| RUBCNL     | 80183  |
| MEDAG      | 84935  |
| CEP128     | 145508 |
| SLIRP      | 81892  |
| RTRAF      | 51637  |
| C14orf2    | 9556   |
| C15orf48   | 84419  |
| C15orf53   | 400359 |
| C16orf54   | 283897 |
| MILR1      | 284021 |
| SCIMP      | 388325 |
| LDLRAD4    | 753    |
| PEAK3      | 374872 |
| C19orf38   | 255809 |
| TRIR       | 79002  |
| MCEMP1     | 199675 |
| C19orf66   | 55337  |
| C1orf116   | 79098  |
| C1orf127   | 148345 |
| GCSAML     | 148823 |
| C1orf162   | 128346 |
| PIK3CD-AS1 | 644997 |
| C1orf228   | 339541 |
| THEMIS2    | 9473   |
| C1orf54    | 79630  |
| C1QA       | 712    |
| C1QB       | 713    |

|          |        |
|----------|--------|
| C1QC     | 714    |
| C1QTNF7  | 114905 |
| LAMP5    | 24141  |
| C2       | 717    |
| RTP5     | 285093 |
| TRABD2A  | 129293 |
| C3       | 718    |
| C3AR1    | 719    |
| C4A      | 720    |
| NDNF     | 79625  |
| C5AR1    | 728    |
| DCANP1   | 140947 |
| CREBRF   | 153222 |
| C5orf56  | 441108 |
| ADTRP    | 84830  |
| UQCC2    | 84300  |
| C6orf132 | 647024 |
| CCDC170  | 80129  |
| C7       | 730    |
| CPED1    | 79974  |
| NUGGC    | 389643 |
| ERCC6L2  | 375748 |
| C9orf139 | 401563 |
| CYSRT1   | 375791 |
| CACNA1C  | 775    |
| CACNA2D2 | 9254   |
| CACNA2D4 | 93589  |
| CALB2    | 794    |
| CALD1    | 800    |
| CALR     | 811    |
| CAMK1    | 8536   |
| CAMK4    | 814    |
| CANX     | 821    |
| CARD11   | 84433  |
| CARD8    | 22900  |
| CARD9    | 64170  |
| CASP5    | 838    |
| CASS4    | 57091  |
| CAV1     | 857    |
| CCDC102B | 79839  |
| CCDC141  | 285025 |
| CCDC69   | 26112  |
| CCDC80   | 151887 |
| CCL11    | 6356   |
| CCL13    | 6357   |
| CCL14    | 6358   |
| CCL15    | 6359   |
| CCL1     | 6346   |
| CCL16    | 6360   |
| CCL17    | 6361   |
| CCL18    | 6362   |
| CCL19    | 6363   |

|         |        |
|---------|--------|
| CCL20   | 6364   |
| CCL21   | 6366   |
| CCL22   | 6367   |
| CCL23   | 6368   |
| CCL24   | 6369   |
| CCL25   | 6370   |
| CCL26   | 10344  |
| CCL2    | 6347   |
| CCL28   | 56477  |
| CCL3    | 6348   |
| CCL3L1  | 6349   |
| CCL3L3  | 414062 |
| CCL4    | 6351   |
| CCL4L1  | 388372 |
| CCL5    | 6352   |
| CCL7    | 6354   |
| CCL8    | 6355   |
| CCNT1   | 904    |
| CCR10   | 2826   |
| CCR1    | 1230   |
| CCR2    | 729230 |
| CCR3    | 1232   |
| CCR4    | 1233   |
| CCR5    | 1234   |
| CCR6    | 1235   |
| CCR7    | 1236   |
| CCR8    | 1237   |
| CCR9    | 10803  |
| CCRL2   | 9034   |
| CD14    | 929    |
| CD160   | 11126  |
| CD163   | 9332   |
| CD163L1 | 283316 |
| CD180   | 4064   |
| CD19    | 930    |
| CD1A    | 909    |
| CD1B    | 910    |
| CD1C    | 911    |
| CD1D    | 912    |
| CD1E    | 913    |
| CD200   | 4345   |
| CD200R1 | 131450 |
| CD207   | 50489  |
| CD209   | 30835  |
| CD226   | 10666  |
| CD22    | 933    |
| CD244   | 51744  |
| CD247   | 919    |
| CD248   | 57124  |
| CD274   | 29126  |
| CD27    | 939    |
| CD28    | 940    |

|          |        |
|----------|--------|
| CD2      | 914    |
| CD300A   | 11314  |
| CD300C   | 10871  |
| CD300E   | 342510 |
| CD300LB  | 124599 |
| CD300LF  | 146722 |
| CD302    | 9936   |
| CD33     | 945    |
| CD34     | 947    |
| CD36     | 948    |
| CD37     | 951    |
| CD3D     | 915    |
| CD3E     | 916    |
| CD3G     | 917    |
| CD40     | 958    |
| CD40LG   | 959    |
| CD48     | 962    |
| CD4      | 920    |
| CD52     | 1043   |
| CD53     | 963    |
| CD58     | 965    |
| CD5      | 921    |
| CD68     | 968    |
| CD6      | 923    |
| CD69     | 969    |
| CD70     | 970    |
| CD72     | 971    |
| CD74     | 972    |
| CD7      | 924    |
| CD79A    | 973    |
| CD79B    | 974    |
| CD80     | 941    |
| CD84     | 8832   |
| CD86     | 942    |
| CD8A     | 925    |
| CD8B     | 926    |
| CD93     | 22918  |
| CD96     | 10225  |
| ADGRE5   | 976    |
| CDC42SE2 | 56990  |
| CDH11    | 1009   |
| CDH20    | 28316  |
| CDH3     | 1001   |
| CDH5     | 1003   |
| CDH6     | 1004   |
| CDK15    | 65061  |
| CDKL5    | 6792   |
| CDSN     | 1041   |
| CEACAM19 | 56971  |
| CEACAM21 | 90273  |
| CEACAM4  | 1089   |
| ADA2     | 51816  |

|         |        |
|---------|--------|
| CELF2   | 10659  |
| CERKL   | 375298 |
| CETP    | 1071   |
| CFP     | 5199   |
| CHAC1   | 79094  |
| CHIT1   | 1118   |
| CHN1    | 1123   |
| CHRD    | 8646   |
| CHRD1   | 91851  |
| CHRNA6  | 8973   |
| CHST13  | 166012 |
| CHST2   | 9435   |
| CIITA   | 4261   |
| CILP    | 8483   |
| CISH    | 1154   |
| CLCF1   | 23529  |
| CLEC10A | 10462  |
| CLEC11A | 6320   |
| CLEC12A | 160364 |
| CLEC14A | 161198 |
| CLEC1A  | 51267  |
| CLEC3B  | 7123   |
| CLEC4A  | 50856  |
| CLEC4D  | 338339 |
| CLEC4E  | 26253  |
| CLEC4G  | 339390 |
| CLEC4M  | 10332  |
| CLEC5A  | 23601  |
| CLEC6A  | 93978  |
| CLEC9A  | 283420 |
| CLECL1  | 160365 |
| CLIC2   | 1193   |
| CLIC3   | 9022   |
| CLIC5   | 53405  |
| CLIP3   | 25999  |
| CLNK    | 116449 |
| CLOCK   | 9575   |
| CLTB    | 1212   |
| CMA1    | 1215   |
| CMAHP   | 8418   |
| CMKLR1  | 1240   |
| CMPK2   | 129607 |
| CNFN    | 84518  |
| CNR2    | 1269   |
| CNRIP1  | 25927  |
| CNTF    | 1270   |
| CNTFR   | 1271   |
| COL10A1 | 1300   |
| COL11A1 | 1301   |
| COL12A1 | 1303   |
| COL14A1 | 7373   |
| COL15A1 | 1306   |



|            |        |
|------------|--------|
| COL18A1    | 80781  |
| COL1A1     | 1277   |
| COL1A2     | 1278   |
| COL6A5     | 256076 |
| COL3A1     | 1281   |
| COL4A1     | 1282   |
| COL4A2     | 1284   |
| COL5A1     | 1289   |
| COL5A2     | 1290   |
| COL5A3     | 50509  |
| COL6A1     | 1291   |
| COL6A2     | 1292   |
| COL6A3     | 1293   |
| COL6A6     | 131873 |
| COL8A1     | 1295   |
| COLEC12    | 81035  |
| CORIN      | 10699  |
| CORO1A     | 11151  |
| COTL1      | 23406  |
| CPA3       | 1359   |
| CPNE5      | 57699  |
| CPVL       | 54504  |
| CPXM1      | 56265  |
| CPZ        | 8532   |
| CR1        | 1378   |
| CR1L       | 1379   |
| CR2        | 1380   |
| CRCT1      | 54544  |
| CREB1      | 1385   |
| CREB3L1    | 90993  |
| CREBL2     | 1389   |
| CRISPLD2   | 83716  |
| CRLF2      | 64109  |
| CRTAM      | 56253  |
| CRYBB1     | 1414   |
| CSF1       | 1435   |
| CSF1R      | 1436   |
| CSF2       | 1437   |
| CSF2RA     | 1438   |
| CSF2RB     | 1439   |
| CSF3       | 1440   |
| CSF3R      | 1441   |
| CSGALNACT2 | 55454  |
| CSMD2      | 114784 |
| CST7       | 8530   |
| CTF1       | 1489   |
| CTGF       | 1490   |
| CTHRC1     | 115908 |
| CTLA4      | 1493   |
| CTSB       | 1508   |
| CTSE       | 1510   |
| CTSG       | 1511   |

|         |        |
|---------|--------|
| CTSK    | 1513   |
| CTSL    | 1514   |
| CTSO    | 1519   |
| CTSS    | 1520   |
| CTSW    | 1521   |
| CTSZ    | 1522   |
| CTTNBP2 | 83992  |
| CX3CL1  | 6376   |
| CX3CR1  | 1524   |
| CXCL10  | 3627   |
| CXCL11  | 6373   |
| CXCL12  | 6387   |
| CXCL1   | 2919   |
| CXCL13  | 10563  |
| CXCL16  | 58191  |
| CXCL2   | 2920   |
| CXCL3   | 2921   |
| CXCL5   | 6374   |
| CXCL6   | 6372   |
| CXCL9   | 4283   |
| CXCR1   | 3577   |
| CXCR2   | 3579   |
| CXCR2P1 | 3580   |
| CXCR3   | 2833   |
| CXCR4   | 7852   |
| CXCR5   | 643    |
| CXCR6   | 10663  |
| ACKR3   | 57007  |
| CXorf21 | 80231  |
| CXorf36 | 79742  |
| CXorf65 | 158830 |
| CYBA    | 1535   |
| CYBB    | 1536   |
| CYFIP2  | 26999  |
| CYP1B1  | 1545   |
| CYP27A1 | 1593   |
| CYSLTR1 | 10800  |
| CYSLTR2 | 57105  |
| CYTH4   | 27128  |
| CYTIP   | 9595   |
| DAAM2   | 23500  |
| DAB2    | 1601   |
| DACT1   | 51339  |
| DACT3   | 147906 |
| ACKR1   | 2532   |
| DBH     | 1621   |
| DCBLD1  | 285761 |
| DCHS1   | 8642   |
| DCN     | 1634   |
| DDI2    | 84301  |
| DDR2    | 4921   |
| DDX58   | 23586  |

|         |        |
|---------|--------|
| DDX60   | 55601  |
| DENND1C | 79958  |
| DENND2A | 27147  |
| DERL3   | 91319  |
| DHRS1   | 115817 |
| DHRS9   | 10170  |
| DIXDC1  | 85458  |
| DKK2    | 27123  |
| DLC1    | 10395  |
| DLL4    | 54567  |
| DMKN    | 93099  |
| DMXL2   | 23312  |
| DNAH8   | 1769   |
| DNAJC5B | 85479  |
| DOCK10  | 55619  |
| DOCK11  | 139818 |
| DOCK2   | 1794   |
| DOCK4   | 9732   |
| DOCK8   | 81704  |
| DOK1    | 1796   |
| DOK2    | 9046   |
| DOK3    | 79930  |
| DOK5    | 55816  |
| DOK6    | 220164 |
| DPEP1   | 1800   |
| DPEP2   | 64174  |
| DPP8    | 54878  |
| DPT     | 1805   |
| DSC1    | 1823   |
| DSG1    | 1828   |
| DSP     | 1832   |
| DUOXA1  | 90527  |
| DUSP16  | 80824  |
| DUSP4   | 1846   |
| DYSF    | 8291   |
| E2F5    | 1875   |
| EBF1    | 1879   |
| EBF2    | 64641  |
| EBI3    | 10148  |
| ECM2    | 1842   |
| ECSCR   | 641700 |
| EDA     | 1896   |
| EDA2R   | 60401  |
| EDAR    | 10913  |
| EDNRA   | 1909   |
| EDNRB   | 1910   |
| EFEMP2  | 30008  |
| EFTUD2  | 9343   |
| EGF     | 1950   |
| EGFR    | 1956   |
| EHD2    | 30846  |
| ADGRL4  | 64123  |

|         |        |
|---------|--------|
| EMCN    | 51705  |
| EMILIN1 | 11117  |
| EMILIN2 | 84034  |
| ADGRE2  | 30817  |
| ADGRE4P | 326342 |
| ENG     | 2022   |
| ENO3    | 2027   |
| ENOX1   | 55068  |
| ENPEP   | 2028   |
| ENPP2   | 5168   |
| ENPP3   | 5169   |
| ENPP4   | 22875  |
| ENTPD1  | 953    |
| EOMES   | 8320   |
| EP300   | 2033   |
| EPCAM   | 4072   |
| EPO     | 2056   |
| EPOR    | 2057   |
| EPS8    | 2059   |
| EPS8L1  | 54869  |
| EPSTI1  | 94240  |
| ERAP1   | 51752  |
| ERAP2   | 64167  |
| ERN1    | 2081   |
| ERP27   | 121506 |
| ESAM    | 90952  |
| ETS1    | 2113   |
| ETV3    | 2117   |
| ETV7    | 51513  |
| EVI2A   | 2123   |
| EVI2B   | 2124   |
| EVPL    | 2125   |
| F13A1   | 2162   |
| F2R     | 2149   |
| F5      | 2153   |
| FABP3   | 2170   |
| FCMR    | 9214   |
| FAM105A | 54491  |
| FAM107A | 11170  |
| PCED1B  | 91523  |
| DENND6B | 414918 |
| FAM129C | 199786 |
| FAM13C  | 220965 |
| FAM155A | 728215 |
| FAM168A | 23201  |
| FAM171B | 165215 |
| FAM177B | 400823 |
| TVP23A  | 780776 |
| CCSER1  | 401145 |
| FAM198B | 51313  |
| FAM19A5 | 25817  |
| FAM25A  | 643161 |

|         |           |
|---------|-----------|
| FAM25BP | 100132929 |
| CALHM5  | 254228    |
| CALHM6  | 441168    |
| PIEZO2  | 63895     |
| STRIP2  | 57464     |
| FAM46B  | 115572    |
| FAM46C  | 54855     |
| FAM49A  | 81553     |
| NXPE4   | 54827     |
| MINDY2  | 54629     |
| RIPOR2  | 9750      |
| FAM78A  | 286336    |
| FAM83A  | 84985     |
| FAM92B  | 339145    |
| FAP     | 2191      |
| FAS     | 355       |
| FASLG   | 356       |
| FAT4    | 79633     |
| FBLN2   | 2199      |
| FBLN5   | 10516     |
| FBN1    | 2200      |
| FBP1    | 2203      |
| FBXL7   | 23194     |
| FBXO6   | 26270     |
| FCAR    | 2204      |
| FCER1A  | 2205      |
| FCER1G  | 2207      |
| FCER2   | 2208      |
| FCGBP   | 8857      |
| FCGR1A  | 2209      |
| FCGR1B  | 2210      |
| FCGR1CP | 100132417 |
| FCGR2A  | 2212      |
| FCGR2B  | 2213      |
| FCGR2C  | 9103      |
| FCGR3A  | 2214      |
| FCGR3B  | 2215      |
| FCGRT   | 2217      |
| FCN1    | 2219      |
| FCRL1   | 115350    |
| FCRL2   | 79368     |
| FCRL3   | 115352    |
| FCRL4   | 83417     |
| FCRL5   | 83416     |
| FCRL6   | 343413    |
| FCRLA   | 84824     |
| FERMT2  | 10979     |
| FERMT3  | 83706     |
| FGD2    | 221472    |
| FGD3    | 89846     |
| FGD5    | 152273    |
| FGF14   | 2259      |

|            |        |
|------------|--------|
| FGF7       | 2252   |
| FGL2       | 10875  |
| FGR        | 2268   |
| FHL5       | 9457   |
| FIBIN      | 387758 |
| FICD       | 11153  |
| VEGFD      | 2277   |
| FILIP1L    | 11259  |
| FKBP11     | 51303  |
| FKBP7      | 51661  |
| FLI1       | 2313   |
| ANKRD36BP2 | 645784 |
| FLT1       | 2321   |
| FLT3       | 2322   |
| FLT3LG     | 2323   |
| FLT4       | 2324   |
| FLVCR2     | 55640  |
| FMNL1      | 752    |
| FMNL3      | 91010  |
| FMOD       | 2331   |
| FN1        | 2335   |
| FNBP1      | 23048  |
| FNDC1      | 84624  |
| FNIP2      | 57600  |
| FOLR2      | 2350   |
| FOXP3      | 50943  |
| FPR1       | 2357   |
| FPR2       | 2358   |
| FPR3       | 2359   |
| FRZB       | 2487   |
| FSCN1      | 6624   |
| FSTL1      | 11167  |
| FSTL3      | 10272  |
| FUCA1      | 2517   |
| FUT7       | 2529   |
| FYB1       | 2533   |
| FYN        | 2534   |
| FZD4       | 8322   |
| GAB3       | 139716 |
| GALM       | 130589 |
| GALNT15    | 117248 |
| GAPT       | 202309 |
| GAS7       | 8522   |
| GATA1      | 2623   |
| GATA2      | 2624   |
| GATA3      | 2625   |
| GATM       | 2628   |
| GBGT1      | 26301  |
| GBP1       | 2633   |
| GBP2       | 2634   |
| GBP4       | 115361 |
| GBP5       | 115362 |

|          |        |
|----------|--------|
| GCSAM    | 257144 |
| GDF5     | 8200   |
| GF11     | 2672   |
| GFRA3    | 2676   |
| GGT1     | 2678   |
| GGT5     | 2687   |
| GGTA1P   | 2681   |
| GHR      | 2690   |
| GHRL     | 51738  |
| GIMAP1   | 170575 |
| GIMAP2   | 26157  |
| GIMAP4   | 55303  |
| GIMAP5   | 55340  |
| GIMAP6   | 474344 |
| GIMAP7   | 168537 |
| GIMAP8   | 155038 |
| GIPC3    | 126326 |
| GIT2     | 9815   |
| GJA4     | 2701   |
| GJA5     | 2702   |
| GJB2     | 2706   |
| GJB3     | 2707   |
| GJB5     | 2709   |
| GJD3     | 125111 |
| GLIPR2   | 152007 |
| GLIS3    | 169792 |
| GLRX     | 2745   |
| COLGALT2 | 23127  |
| GLT8D2   | 83468  |
| GMFG     | 9535   |
| GMIP     | 51291  |
| GMPR     | 2766   |
| GNA15    | 2769   |
| GNAI2    | 2771   |
| GNG11    | 2791   |
| GNG2     | 54331  |
| GNG7     | 2788   |
| GNGT2    | 2793   |
| GNLY     | 10578  |
| GNS      | 2799   |
| GPBAR1   | 151306 |
| GPC5     | 2262   |
| GPC6     | 10082  |
| GPIHBP1  | 338328 |
| ADGRG5   | 221188 |
| ADGRF4   | 221393 |
| ADGRF5   | 221395 |
| ADGRA2   | 25960  |
| GPR132   | 29933  |
| ADGRD1   | 283383 |
| GPR137B  | 7107   |
| GPR141   | 353345 |

|         |        |
|---------|--------|
| GPR15   | 2838   |
| GPR157  | 80045  |
| GPR171  | 29909  |
| GPR174  | 84636  |
| GPR18   | 2841   |
| GPR183  | 1880   |
| GPR25   | 2848   |
| GPR34   | 2857   |
| GPR35   | 2859   |
| GPR4    | 2828   |
| GPR55   | 9290   |
| GPR65   | 8477   |
| GPR78   | 27201  |
| GPR82   | 27197  |
| GPR84   | 53831  |
| GPRIN3  | 285513 |
| GPSM3   | 63940  |
| GRAP    | 10750  |
| GRAP2   | 9402   |
| GREM1   | 26585  |
| GRIN3A  | 116443 |
| GSDMA   | 284110 |
| GTF2A1  | 2957   |
| GUCY1A2 | 2977   |
| GUCY1A3 | 2982   |
| GVINP1  | 387751 |
| GYPC    | 2995   |
| GZMA    | 3001   |
| GZMB    | 3002   |
| GZMH    | 2999   |
| GZMK    | 3003   |
| GZMM    | 3004   |
| HAMP    | 57817  |
| HAPLN3  | 145864 |
| HAVCR1  | 26762  |
| HAVCR2  | 84868  |
| HCG26   | 352961 |
| HCK     | 3055   |
| HCLS1   | 3059   |
| HCP5    | 10866  |
| HCST    | 10870  |
| HDC     | 3067   |
| HECW2   | 57520  |
| HEPH    | 9843   |
| HEPHL1  | 341208 |
| HERC6   | 55008  |
| HERPUD1 | 9709   |
| HEYL    | 26508  |
| HFE     | 3077   |
| HGF     | 3082   |
| HIC1    | 3090   |
| HIPK3   | 10114  |



|           |        |
|-----------|--------|
| HIST1H2AE | 3012   |
| HIST1H2AG | 8969   |
| HIST1H2AM | 8336   |
| HIST1H3H  | 8357   |
| HK3       | 3101   |
| HLA-A     | 3105   |
| HLA-B     | 3106   |
| HLA-C     | 3107   |
| HLA-DMA   | 3108   |
| HLA-DMB   | 3109   |
| HLA-DOA   | 3111   |
| HLA-DOB   | 3112   |
| HLA-DPA1  | 3113   |
| HLA-DPB1  | 3115   |
| HLA-DPB2  | 3116   |
| HLA-DQA1  | 3117   |
| HLA-DQA2  | 3118   |
| HLA-DQB1  | 3119   |
| HLA-DQB2  | 3120   |
| HLA-DRA   | 3122   |
| HLA-DRB1  | 3123   |
| HLA-DRB5  | 3127   |
| HLA-DRB6  | 3128   |
| HLA-E     | 3133   |
| HLA-F     | 3134   |
| HLA-G     | 3135   |
| HLA-H     | 3136   |
| HLX       | 3142   |
| HMCN1     | 83872  |
| ARHGAP45  | 23526  |
| HMSD      | 284293 |
| HNMT      | 3176   |
| HPGD      | 3248   |
| HPGDS     | 27306  |
| HRH2      | 3274   |
| HS3ST1    | 9957   |
| HS3ST2    | 9956   |
| HSD11B1   | 3290   |
| HSD17B14  | 51171  |
| HSH2D     | 84941  |
| HSP90AA1  | 3320   |
| HSP90AB1  | 3326   |
| HSPA12B   | 116835 |
| HSPA1A    | 3303   |
| HSPA1B    | 3304   |
| HSPA1L    | 3305   |
| HSPA2     | 3306   |
| HSPA4     | 3308   |
| HSPA5     | 3309   |
| HSPA6     | 3310   |
| HSPA8     | 3312   |
| HTR2A     | 3356   |

|        |        |
|--------|--------|
| HTRA3  | 94031  |
| HTRA4  | 203100 |
| HVCN1  | 84329  |
| HYDIN  | 54768  |
| ICAM1  | 3383   |
| ICAM2  | 3384   |
| ICAM3  | 3385   |
| ICK    | 22858  |
| ICOS   | 29851  |
| ICOSLG | 23308  |
| IDO1   | 3620   |
| IDO2   | 169355 |
| IFFO1  | 25900  |
| IFI27  | 3429   |
| IFI30  | 10437  |
| IFI35  | 3430   |
| IFI44  | 10561  |
| IFI44L | 10964  |
| IFI6   | 2537   |
| IFIH1  | 64135  |
| IFIT2  | 3433   |
| IFIT3  | 3437   |
| IFIT5  | 24138  |
| IFITM1 | 8519   |
| IFITM3 | 10410  |
| IFNA13 | 3447   |
| IFNA21 | 3452   |
| IFNAR1 | 3454   |
| IFNAR2 | 3455   |
| IFNB1  | 3456   |
| IFNE   | 338376 |
| IFNG   | 3458   |
| IFNGR1 | 3459   |
| IFNGR2 | 3460   |
| IFNK   | 56832  |
| IFNW1  | 3467   |
| IGDCC4 | 57722  |
| IGF1   | 3479   |
| JCHAIN | 3512   |
| IGLL1  | 3543   |
| IGSF10 | 285313 |
| IGSF21 | 84966  |
| IGSF6  | 10261  |
| IKZF1  | 10320  |
| IKZF3  | 22806  |
| IL10   | 3586   |
| IL10RA | 3587   |
| IL10RB | 3588   |
| IL11   | 3589   |
| IL11RA | 3590   |
| IL12A  | 3592   |
| IL12B  | 3593   |

|         |        |
|---------|--------|
| IL12RB1 | 3594   |
| IL12RB2 | 3595   |
| IL13    | 3596   |
| IL13RA1 | 3597   |
| IL15    | 3600   |
| IL15RA  | 3601   |
| IL16    | 3603   |
| IL17A   | 3605   |
| IL17B   | 27190  |
| IL17RA  | 23765  |
| IL17RB  | 55540  |
| IL18    | 3606   |
| IL18BP  | 10068  |
| IL18R1  | 8809   |
| IL18RAP | 8807   |
| IL19    | 29949  |
| IL1A    | 3552   |
| IL1B    | 3553   |
| IL36G   | 56300  |
| IL1R1   | 3554   |
| IL1R2   | 7850   |
| IL1RAP  | 3556   |
| IL1RL1  | 9173   |
| IL1RN   | 3557   |
| IL20    | 50604  |
| IL20RA  | 53832  |
| IL20RB  | 53833  |
| IL21    | 59067  |
| IL21R   | 50615  |
| IL22    | 50616  |
| IL22RA1 | 58985  |
| IL22RA2 | 116379 |
| IL2     | 3558   |
| IL23A   | 51561  |
| IL23R   | 149233 |
| IL24    | 11009  |
| IL27    | 246778 |
| IFNL2   | 282616 |
| IFNLR1  | 163702 |
| IFNL1   | 282618 |
| IL2RA   | 3559   |
| IL2RB   | 3560   |
| IL2RG   | 3561   |
| IL32    | 9235   |
| IL3RA   | 3563   |
| IL4     | 3565   |
| IL4I1   | 259307 |
| IL4R    | 3566   |
| IL5     | 3567   |
| IL5RA   | 3568   |
| IL6     | 3569   |
| IL6R    | 3570   |

|         |        |
|---------|--------|
| IL6ST   | 3572   |
| IL7     | 3574   |
| IL7R    | 3575   |
| CXCL8   | 3576   |
| IL9     | 3578   |
| IL9R    | 3581   |
| INHBA   | 3624   |
| INHBB   | 3625   |
| INHBC   | 3626   |
| INHBE   | 83729  |
| INMT    | 11185  |
| INPP5D  | 3635   |
| IPCEF1  | 26034  |
| IQGAP2  | 10788  |
| IRF1    | 3659   |
| IRF4    | 3662   |
| IRF7    | 3665   |
| IRF8    | 3394   |
| IRF9    | 10379  |
| ISG15   | 9636   |
| ISG20   | 3669   |
| ISLR    | 3671   |
| ITGA11  | 22801  |
| ITGA1   | 3672   |
| ITGA2B  | 3674   |
| ITGA4   | 3676   |
| ITGA5   | 3678   |
| ITGA8   | 8516   |
| ITGA9   | 3680   |
| ITGAD   | 3681   |
| ITGAL   | 3683   |
| ITGAM   | 3684   |
| ITGAX   | 3687   |
| ITGB1   | 3688   |
| ITGB2   | 3689   |
| ITGB3   | 3690   |
| ITGB7   | 3695   |
| ITGBL1  | 9358   |
| ITK     | 3702   |
| ITM2A   | 9452   |
| IVL     | 3713   |
| JAK2    | 3717   |
| JAK3    | 3718   |
| JAKMIP1 | 152789 |
| JAM2    | 58494  |
| JAM3    | 83700  |
| JMY     | 133746 |
| JSRP1   | 126306 |
| JUP     | 3728   |
| KCNA3   | 3738   |
| KCNAB2  | 8514   |
| KCND2   | 3751   |

|          |        |
|----------|--------|
| KCNE4    | 23704  |
| KCNH2    | 3757   |
| KCNJ10   | 3766   |
| KCNJ8    | 3764   |
| KCNK13   | 56659  |
| KCNK6    | 9424   |
| KCNMB1   | 3779   |
| KCNN3    | 3782   |
| KCNN4    | 3783   |
| KCNT2    | 343450 |
| KCTD12   | 115207 |
| KDR      | 3791   |
| FAM30A   | 9834   |
| KIAA0368 | 23392  |
| TESPA1   | 9840   |
| KIAA0754 | 643314 |
| JCAD     | 57608  |
| KIAA1549 | 57670  |
| TLDC1    | 57707  |
| SHISAL1  | 85352  |
| KIAA1755 | 85449  |
| KIF21B   | 23046  |
| KIR2DL1  | 3802   |
| KIR2DL3  | 3804   |
| KIR2DL4  | 3805   |
| KIR2DS4  | 3809   |
| KIR3DL1  | 3811   |
| KIR3DL2  | 3812   |
| KIR3DL3  | 115653 |
| KIRREL1  | 55243  |
| KIT      | 3815   |
| KITLG    | 4254   |
| KL       | 9365   |
| KLHDC10  | 23008  |
| KLHL11   | 55175  |
| KLHL23   | 151230 |
| KLHL6    | 89857  |
| KLK7     | 5650   |
| KLK9     | 284366 |
| KLRB1    | 3820   |
| KLRC1    | 3821   |
| KLRC2    | 3822   |
| KLRC3    | 3823   |
| KLRC4    | 8302   |
| KLRD1    | 3824   |
| KLRG1    | 10219  |
| KLRK1    | 22914  |
| KMO      | 8564   |
| KRT1     | 3848   |
| KRT14    | 3861   |
| KRT16    | 3868   |
| KRT6A    | 3853   |

|        |        |
|--------|--------|
| KRT6B  | 3854   |
| KRT6C  | 286887 |
| KRT78  | 196374 |
| LAD1   | 3898   |
| LAG3   | 3902   |
| LAIR1  | 3903   |
| LAIR2  | 3904   |
| LAMA2  | 3908   |
| LAMA4  | 3910   |
| LAMC2  | 3918   |
| LAP3   | 51056  |
| LPTM5  | 7805   |
| LAT    | 27040  |
| LAT2   | 7462   |
| LATS1  | 9113   |
| LATS2  | 26524  |
| LAX1   | 54900  |
| LCE3D  | 84648  |
| LCK    | 3932   |
| LCN10  | 414332 |
| LCOR   | 84458  |
| LCP1   | 3936   |
| LCP2   | 3937   |
| LDB2   | 9079   |
| LEP    | 3952   |
| LEPR   | 3953   |
| LGALS2 | 3957   |
| LGALS9 | 3965   |
| LGI2   | 55203  |
| LGMN   | 5641   |
| LHFPL6 | 10186  |
| LHFPL2 | 10184  |
| LIF    | 3976   |
| LIFR   | 3977   |
| LIG3   | 3980   |
| LILRA1 | 11024  |
| LILRA2 | 11027  |
| LILRA3 | 11026  |
| LILRA4 | 23547  |
| LILRA5 | 353514 |
| LILRA6 | 79168  |
| LILRB1 | 10859  |
| LILRB2 | 10288  |
| LILRB3 | 11025  |
| LILRB4 | 11006  |
| LILRB5 | 10990  |
| LILRP2 | 79166  |
| LIMD2  | 80774  |
| LIME1  | 54923  |
| LIMS1  | 3987   |
| LIPA   | 3988   |
| LMOD1  | 25802  |

|              |           |
|--------------|-----------|
| LMTK2        | 22853     |
| UNQ6494      | 100129066 |
| FAM83A-AS1   | 100131726 |
| LINC00426    | 100188949 |
| PCED1B-AS1   | 100233209 |
| TNFRSF14-AS1 | 115110    |
| LINC00654    | 149837    |
| LINC00926    | 283663    |
| SMIM1        | 388588    |
| LGALS17A     | 400696    |
| MIR31HG      | 554202    |
| LOC606724    | 606724    |
| LOC653786    | 653786    |
| LOC730101    | 730101    |
| BMS1P20      | 96610     |
| LOXL2        | 4017      |
| LOXL3        | 84695     |
| LPAR4        | 2846      |
| LPL          | 4023      |
| PLPPR4       | 9890      |
| LPXN         | 9404      |
| LRCH2        | 57631     |
| LRMP         | 4033      |
| LRP6         | 4040      |
| LRRC15       | 131578    |
| LRRC17       | 10234     |
| LRRC25       | 126364    |
| LRRC32       | 2615      |
| NRROS        | 375387    |
| LSAMP        | 4045      |
| LSP1         | 4046      |
| LST1         | 7940      |
| LTA          | 4049      |
| LTB          | 4050      |
| LTBP2        | 4053      |
| LTBR         | 4055      |
| LTC4S        | 4056      |
| LUM          | 4060      |
| LY86         | 9450      |
| LY9          | 4063      |
| LY96         | 23643     |
| LYL1         | 4066      |
| LYN          | 4067      |
| LYPD3        | 27076     |
| LYPD5        | 284348    |
| LYVE1        | 10894     |
| LYZ          | 4069      |
| MAGEL2       | 54551     |
| MAN1A1       | 4121      |
| MAN1A2       | 10905     |
| MAN1C1       | 57134     |
| MAOB         | 4129      |

|          |       |           |
|----------|-------|-----------|
| MAP1LC3C |       | 440738    |
| MAP3K2   |       | 10746     |
| MAP4K1   |       | 11184     |
| MAP7D1   |       | 55700     |
|          | 43160 | 55016     |
|          | 43167 | 220972    |
| MARCO    |       | 8685      |
| MBNL3    |       | 55796     |
| SLC25A53 |       | 401612    |
| MCOLN2   |       | 255231    |
| MED13    |       | 9969      |
| MED13L   |       | 23389     |
| MEF2B    |       | 100271849 |
| MEF2C    |       | 4208      |
| MEI1     |       | 150365    |
| MEOX2    |       | 4223      |
| MET      |       | 4233      |
| MFAP3    |       | 4238      |
| MFAP4    |       | 4239      |
| MFNG     |       | 4242      |
| MFRP     |       | 83552     |
| MFSD7    |       | 84179     |
| MGAT4A   |       | 11320     |
| MGAT5    |       | 4249      |
| MZB1     |       | 51237     |
| MGP      |       | 4256      |
| NA       |       | 4276      |
| MICAL2   |       | 9645      |
| MICB     |       | 4277      |
| MIR155HG |       | 114614    |
| MITF     |       | 4286      |
| MLPH     |       | 79083     |
| MMP12    |       | 4321      |
| MMP1     |       | 4312      |
| MMP14    |       | 4323      |
| MMP16    |       | 4325      |
| MMP2     |       | 4313      |
| MMP25    |       | 64386     |
| MMP3     |       | 4314      |
| MMP9     |       | 4318      |
| MMRN1    |       | 22915     |
| MMRN2    |       | 79812     |
| MNDA     |       | 4332      |
| MPEG1    |       | 219972    |
| MPL      |       | 4352      |
| MPP1     |       | 4354      |
| MR1      |       | 3140      |
| MRC1     |       | 4360      |
| MRGPRF   |       | 116535    |
| MRO      |       | 83876     |
| MRPL27   |       | 51264     |
| MRPL55   |       | 128308    |



|          |        |
|----------|--------|
| MRPS12   | 6183   |
| MRPS21   | 54460  |
| MRVI1    | 10335  |
| MS4A14   | 84689  |
| MS4A1    | 931    |
| MS4A2    | 2206   |
| MS4A4A   | 51338  |
| MS4A6A   | 64231  |
| MS4A7    | 58475  |
| MSR1     | 4481   |
| MSRB3    | 253827 |
| MVP      | 9961   |
| MX1      | 4599   |
| MXD1     | 4084   |
| MXRA8    | 54587  |
| MYCT1    | 80177  |
| MYEF2    | 50804  |
| MYO1F    | 4542   |
| MYO1G    | 64005  |
| MYO7A    | 4647   |
| MYO9A    | 4649   |
| N4BP2    | 55728  |
| N4BP2L1  | 90634  |
| NAALADL1 | 10004  |
| NAIP     | 4671   |
| NAP1L3   | 4675   |
| NAPSB    | 256236 |
| NBEA     | 26960  |
| NBEAL1   | 65065  |
| NCCRP1   | 342897 |
| NCF1     | 653361 |
| NCF1B    | 654816 |
| NCF1C    | 654817 |
| NCF2     | 4688   |
| NCF4     | 4689   |
| NCKAP1L  | 3071   |
| NCOA2    | 10499  |
| NCR1     | 9437   |
| NCR3     | 259197 |
| NEGR1    | 257194 |
| NFAM1    | 150372 |
| NFATC2   | 4773   |
| NFKB2    | 4791   |
| NFKBID   | 84807  |
| NFKBIE   | 4794   |
| NFYA     | 4800   |
| NFYB     | 4801   |
| NFYC     | 4802   |
| NHLRC2   | 374354 |
| NHSL2    | 340527 |
| NID2     | 22795  |
| NIPAL4   | 348938 |

|          |        |
|----------|--------|
| NKG7     | 4818   |
| NLRC3    | 197358 |
| NLRC4    | 58484  |
| NLRC5    | 84166  |
| NLRP12   | 91662  |
| NLRP3    | 114548 |
| NMI      | 9111   |
| NOD2     | 64127  |
| NOTCH4   | 4855   |
| NOVA2    | 4858   |
| NOX4     | 50507  |
| NR1H3    | 10062  |
| NR5A2    | 2494   |
| NRP1     | 8829   |
| NRXN3    | 9369   |
| NT5E     | 4907   |
| NTM      | 50863  |
| NTNG2    | 84628  |
| NTRK1    | 4914   |
| OAS1     | 4938   |
| OAS2     | 4939   |
| OAS3     | 4940   |
| OASL     | 8638   |
| TENM3    | 55714  |
| OGFRL1   | 79627  |
| OGN      | 4969   |
| OLFML1   | 283298 |
| OLFML2B  | 25903  |
| OLFML3   | 56944  |
| OLR1     | 4973   |
| OMD      | 4958   |
| OSCAR    | 126014 |
| OSM      | 5008   |
| OSMR     | 9180   |
| OTOA     | 146183 |
| OVOL1    | 5017   |
| P2RX1    | 5023   |
| P2RX4    | 5025   |
| P2RX5    | 5026   |
| P2RX7    | 5027   |
| P2RY10   | 27334  |
| P2RY11   | 5032   |
| P2RY12   | 64805  |
| P2RY13   | 53829  |
| P2RY14   | 9934   |
| P2RY8    | 286530 |
| P4HA3    | 283208 |
| PABPC5   | 140886 |
| PADI2    | 11240  |
| PAFAH1B2 | 5049   |
| PAG1     | 55824  |
| PAK5     | 57144  |

|             |        |
|-------------|--------|
| PALM2-AKAP2 | 445815 |
| PARM1       | 25849  |
| PARP12      | 64761  |
| PARP14      | 54625  |
| PARP15      | 165631 |
| PARP9       | 83666  |
| PARVG       | 64098  |
| PATL2       | 197135 |
| PATZ1       | 23598  |
| PBX4        | 80714  |
| PCDH12      | 51294  |
| PCDH17      | 27253  |
| PCDH18      | 54510  |
| PCDHGA12    | 26025  |
| PCOLCE      | 5118   |
| PCYOX1L     | 78991  |
| PDCD1       | 5133   |
| PDCD1LG2    | 80380  |
| PDE1A       | 5136   |
| PDE1B       | 5153   |
| PDE3A       | 5139   |
| PDE3B       | 5140   |
| PDE4B       | 5142   |
| PDE6G       | 5148   |
| PDGFA       | 5154   |
| PDGFB       | 5155   |
| PDGFC       | 56034  |
| PDGFRA      | 5156   |
| PDGFRB      | 5159   |
| PDGFRL      | 5157   |
| PDIA2       | 64714  |
| PDIA3       | 2923   |
| PDZK1IP1    | 10158  |
| PDZRN3      | 23024  |
| PECAM1      | 5175   |
| PEG3        | 5178   |
| PFDN2       | 5202   |
| PGLYRP4     | 57115  |
| PGM5        | 5239   |
| PHACTR1     | 221692 |
| PIK3AP1     | 118788 |
| PIK3CG      | 5294   |
| PIK3R5      | 23533  |
| PIK3R6      | 146850 |
| PILRA       | 29992  |
| PIM2        | 11040  |
| PIP4K2A     | 5305   |
| PKD2L1      | 9033   |
| PKHD1L1     | 93035  |
| PKIB        | 5570   |
| PKP3        | 11187  |
| PLA1A       | 51365  |

|          |        |
|----------|--------|
| PLA2G2D  | 26279  |
| PLA2G4E  | 123745 |
| PLA2G7   | 7941   |
| PLAC9    | 219348 |
| PLCB2    | 5330   |
| PLCB4    | 5332   |
| PLCL1    | 5334   |
| PLCL2    | 23228  |
| PLD4     | 122618 |
| PLEK2    | 26499  |
| PLEK     | 5341   |
| PLEKHM3  | 389072 |
| PLEKHN1  | 84069  |
| PLEKHO1  | 51177  |
| PLEKHO2  | 80301  |
| PLIN3    | 10226  |
| PLVAP    | 83483  |
| PLXDC1   | 57125  |
| PLXNA4   | 91584  |
| PLXNC1   | 10154  |
| PLXND1   | 23129  |
| PML      | 5371   |
| PMP22    | 5376   |
| PNLIPRP3 | 119548 |
| PNMA2    | 10687  |
| PNOC     | 5368   |
| PODN     | 127435 |
| POSTN    | 10631  |
| POU2AF1  | 5450   |
| POU2F2   | 5452   |
| PLPP3    | 8613   |
| PLPP4    | 196051 |
| PLPP7    | 84814  |
| PPBP     | 5473   |
| PPFIA2   | 8499   |
| PPL      | 5493   |
| PPM1H    | 57460  |
| PPM1M    | 132160 |
| PPP1R13L | 10848  |
| PPP1R16B | 26051  |
| PPP1R9A  | 55607  |
| PRAM1    | 84106  |
| PRELP    | 5549   |
| PREX1    | 57580  |
| PREX2    | 80243  |
| PRF1     | 5551   |
| PRG2     | 5553   |
| PRKAR2A  | 5576   |
| PRKAR2B  | 5577   |
| PRKCB    | 5579   |
| PRKCQ    | 5588   |
| PRKG1    | 5592   |

|         |        |
|---------|--------|
| PRL     | 5617   |
| PRLR    | 5618   |
| PROCR   | 10544  |
| PROM1   | 8842   |
| PRRX1   | 5396   |
| PRSS27  | 83886  |
| PRTG    | 283659 |
| PSAP    | 5660   |
| PSMB10  | 5699   |
| PSMB8   | 5696   |
| PSMB9   | 5698   |
| PSMC1   | 5700   |
| PSMC2   | 5701   |
| PSMC3   | 5702   |
| PSMC4   | 5704   |
| PSMC5   | 5705   |
| PSMC6   | 5706   |
| PSMD10  | 5716   |
| PSMD11  | 5717   |
| PSMD13  | 5719   |
| PSMD14  | 10213  |
| PSMD1   | 5707   |
| PSMD2   | 5708   |
| PSMD3   | 5709   |
| PSMD4   | 5710   |
| PSMD5   | 5711   |
| PSMD6   | 9861   |
| PSMD7   | 5713   |
| PSMD8   | 5714   |
| PSME1   | 5720   |
| PSME2   | 5721   |
| PSME3   | 10197  |
| PSTPIP1 | 9051   |
| PTAFR   | 5724   |
| PTCRA   | 171558 |
| PTGDR   | 5729   |
| PTGDS   | 5730   |
| PTGER2  | 5732   |
| PTGFR   | 5737   |
| PTGIR   | 5739   |
| PTGIS   | 5740   |
| PTH1R   | 5745   |
| PTPN22  | 26191  |
| PTPN6   | 5777   |
| PTPN7   | 5778   |
| PTPRB   | 5787   |
| PTPRC   | 5788   |
| PTPRCAP | 5790   |
| PTPRJ   | 5795   |
| PTPRM   | 5797   |
| PTPRO   | 5800   |
| CAVIN1  | 284119 |

|         |        |
|---------|--------|
| PUS10   | 150962 |
| PVR     | 5817   |
| PVRIG   | 79037  |
| NECTIN2 | 5819   |
| NECTIN3 | 25945  |
| PYHIN1  | 149628 |
| QPRT    | 23475  |
| RAB20   | 55647  |
| RAB33A  | 9363   |
| RAB37   | 326624 |
| RAB39A  | 54734  |
| RAB39B  | 116442 |
| RAB42   | 115273 |
| RAB8B   | 51762  |
| RAD23B  | 5887   |
| RAD54L2 | 23132  |
| RAET1E  | 135250 |
| RAET1G  | 353091 |
| RAET1L  | 154064 |
| RAI2    | 10742  |
| RAMP3   | 10268  |
| RAPGEF2 | 9693   |
| RAPGEF6 | 51735  |
| RARRES2 | 5919   |
| RARRES3 | 5920   |
| RASAL3  | 64926  |
| RASGRF2 | 5924   |
| RASGRP2 | 10235  |
| RASGRP3 | 25780  |
| RASGRP4 | 115727 |
| RASL12  | 51285  |
| RASSF2  | 9770   |
| RASSF3  | 283349 |
| RASSF4  | 83937  |
| RASSF5  | 83593  |
| RASSF6  | 166824 |
| RBM38   | 55544  |
| RBP5    | 83758  |
| RC3H2   | 54542  |
| RCAN2   | 10231  |
| RCN3    | 57333  |
| RCSD1   | 92241  |
| RDH12   | 145226 |
| RECK    | 8434   |
| REL     | 5966   |
| RELB    | 5971   |
| RELN    | 5649   |
| RENBP   | 5973   |
| REST    | 5978   |
| RFTN1   | 23180  |
| RFX5    | 5993   |
| RFXANK  | 8625   |

|         |        |
|---------|--------|
| RFXAP   | 5994   |
| RGL1    | 23179  |
| RGL4    | 266747 |
| RGPD1   | 400966 |
| RGS13   | 6003   |
| RGS1    | 5996   |
| RGS18   | 64407  |
| RGS5    | 8490   |
| RHOD    | 29984  |
| RHOH    | 399    |
| RHOJ    | 57381  |
| RIF1    | 55183  |
| RIMKLA  | 284716 |
| RIN1    | 9610   |
| RIN3    | 79890  |
| CARMIL2 | 146206 |
| RNASE1  | 6035   |
| RNASE2  | 6036   |
| RNASE6  | 6039   |
| RNASE7  | 84659  |
| RNF125  | 54941  |
| RNF166  | 115992 |
| RNF180  | 285671 |
| RNF222  | 643904 |
| LAMTOR2 | 28956  |
| ROBO4   | 54538  |
| ROCK2   | 9475   |
| ROR1    | 4919   |
| RPS6KA4 | 8986   |
| RRN3P2  | 653390 |
| RSAD2   | 91543  |
| RTKN2   | 219790 |
| RTN1    | 6252   |
| RTP4    | 64108  |
| RUFY4   | 285180 |
| NA      | 84127  |
| RUNX1T1 | 862    |
| RUNX3   | 864    |
| S100A12 | 6283   |
| S100A16 | 140576 |
| S100A2  | 6273   |
| S100A7  | 6278   |
| S100A7A | 338324 |
| S100A8  | 6279   |
| S100A9  | 6280   |
| S100B   | 6285   |
| S1PR1   | 1901   |
| S1PR4   | 8698   |
| SALL2   | 6297   |
| SAMD14  | 201191 |
| SAMD3   | 154075 |
| SAMD9   | 54809  |

|           |       |           |
|-----------|-------|-----------|
| SAMD9L    |       | 219285    |
| SAMHD1    |       | 25939     |
| SAMSN1    |       | 64092     |
| SARDH     |       | 1757      |
| SASH3     |       | 54440     |
| SBNO1     |       | 55206     |
| SBSN      |       | 374897    |
| SCARF1    |       | 8578      |
| SCARF2    |       | 91179     |
| SCEL      |       | 8796      |
| SCML4     |       | 256380    |
| SCN7A     |       | 6332      |
| SCUBE3    |       | 222663    |
| SDC2      |       | 6383      |
| SDCBP2    |       | 27111     |
| SDR9C7    |       | 121214    |
| SDS       |       | 10993     |
| SDSL      |       | 113675    |
| SEC24A    |       | 10802     |
| SEC24D    |       | 9871      |
| SECISBP2L |       | 9728      |
| SECTM1    |       | 6398      |
| SELENBP1  |       | 8991      |
| SELL      |       | 6402      |
| SELP      |       | 6403      |
| SELPLG    |       | 6404      |
|           | 43344 | 1731      |
|           | 43349 | 23157     |
| SERINC5   |       | 256987    |
| SERPINA1  |       | 5265      |
| SERPINE1  |       | 5054      |
| SERPINF1  |       | 5176      |
| SERPING1  |       | 710       |
| SFMBT2    |       | 57713     |
| SFN       |       | 2810      |
| SFRP2     |       | 6423      |
| SFTPB     |       | 6439      |
| SGCD      |       | 6444      |
| SGIP1     |       | 84251     |
| POMK      |       | 84197     |
| PEAK1     |       | 79834     |
| SH2B3     |       | 10019     |
| SH2D1A    |       | 4068      |
| SH2D2A    |       | 9047      |
| SH2D3C    |       | 10044     |
| SH2D5     |       | 400745    |
| SHE       |       | 126669    |
| SEM1      |       | 7979      |
| SIGLEC10  |       | 89790     |
| SIGLEC11  |       | 114132    |
| SIGLEC12  |       | 89858     |
| SIGLEC14  |       | 100049587 |



|           |        |
|-----------|--------|
| SIGLEC1   | 6614   |
| SIGLEC5   | 8778   |
| SIGLEC6   | 946    |
| SIGLEC7   | 27036  |
| SIGLEC8   | 27181  |
| SIGLEC9   | 27180  |
| SIGLEC17P | 284367 |
| SIRPB1    | 10326  |
| SIRPB2    | 284759 |
| SIRPG     | 55423  |
| SIT1      | 27240  |
| SKAP1     | 8631   |
| SLA2      | 84174  |
| SLA       | 6503   |
| SLAMF1    | 6504   |
| SLAMF6    | 114836 |
| SLAMF7    | 57823  |
| SLAMF8    | 56833  |
| SLC10A2   | 6555   |
| SLC11A1   | 6556   |
| SLC12A3   | 6559   |
| SLC15A3   | 51296  |
| SLC17A9   | 63910  |
| SLC18A2   | 6571   |
| SLC1A7    | 6512   |
| SLC24A4   | 123041 |
| SLC25A45  | 283130 |
| SLC29A3   | 55315  |
| SLC2A5    | 6518   |
| SLC34A2   | 10568  |
| SLC39A2   | 29986  |
| SLC45A3   | 85414  |
| SLC6A12   | 6539   |
| SLC7A7    | 9056   |
| SLC8A1    | 6546   |
| SLCO2B1   | 11309  |
| SLCO5A1   | 81796  |
| NA        | 342615 |
| SLIT2     | 9353   |
| SLIT3     | 6586   |
| SLURP1    | 57152  |
| SMAP2     | 64744  |
| SMPDL3B   | 27293  |
| SNAI3     | 333929 |
| SNED1     | 25992  |
| SNRPF     | 6636   |
| SNTB1     | 6641   |
| SNX20     | 124460 |
| SOD3      | 6649   |
| SON       | 6651   |
| SOX17     | 64321  |
| SOX5      | 6660   |

|            |        |
|------------|--------|
| SP100      | 6672   |
| SP110      | 3431   |
| SP140      | 11262  |
| SPAG4      | 6676   |
| SPARC      | 6678   |
| SPARCL1    | 8404   |
| SPATA13    | 221178 |
| SPI1       | 6688   |
| SPIB       | 6689   |
| SPN        | 6693   |
| SPNS3      | 201305 |
| SPOCK2     | 9806   |
| SPON1      | 10418  |
| SPRR1A     | 6698   |
| SPRR1B     | 6699   |
| SPRR2D     | 6703   |
| SPRR2E     | 6704   |
| SPRR2G     | 6706   |
| SPRY1      | 10252  |
| SRGN       | 5552   |
| SSC5D      | 284297 |
| SSTR3      | 6753   |
| ST3GAL2    | 6483   |
| ST3GAL5    | 8869   |
| ST3GAL6    | 10402  |
| ST6GAL1    | 6480   |
| ST6GALNAC3 | 256435 |
| ST8SIA4    | 7903   |
| STAB1      | 23166  |
| STAC3      | 246329 |
| STAP1      | 26228  |
| STARD13    | 90627  |
| STARD8     | 9754   |
| STAT1      | 6772   |
| STAT4      | 6775   |
| STAT5A     | 6776   |
| STK17B     | 9262   |
| STK33      | 65975  |
| STRN       | 6801   |
| STXBP6     | 29091  |
| SUCNR1     | 56670  |
| SULF1      | 23213  |
| SULT1C2    | 6819   |
| SULT1C4    | 27233  |
| SULT2B1    | 6820   |
| SUSD3      | 203328 |
| SVOPL      | 136306 |
| SYNE1      | 23345  |
| SYT11      | 23208  |
| SYTL3      | 94120  |
| TAGAP      | 117289 |
| TAOK1      | 57551  |

|          |        |
|----------|--------|
| TAP1     | 6890   |
| TAP2     | 6891   |
| TAPBP    | 6892   |
| TAPBPL   | 55080  |
| TARP     | 445347 |
| TBC1D10C | 374403 |
| TBCEL    | 219899 |
| TBX21    | 30009  |
| TBXA2R   | 6915   |
| TBXAS1   | 6916   |
| TCEAL7   | 56849  |
| TCIRG1   | 10312  |
| TCL1A    | 8115   |
| TCN2     | 6948   |
| TEK      | 7010   |
| TESC     | 54997  |
| TFEC     | 22797  |
| TGFB1    | 7040   |
| TGFB2    | 7042   |
| TGFB3    | 7043   |
| TGFB1    | 7045   |
| TGFBR1   | 7046   |
| TGFBR2   | 7048   |
| TGFBRAP1 | 9392   |
| TGM1     | 7051   |
| TGM2     | 7052   |
| THBS1    | 7057   |
| THBS2    | 7058   |
| THEMIS   | 387357 |
| THPO     | 7066   |
| THSD7A   | 221981 |
| THY1     | 7070   |
| TIE1     | 7075   |
| TIFAB    | 497189 |
| TIGIT    | 201633 |
| TIMD4    | 91937  |
| PAM16    | 51025  |
| TIMM50   | 92609  |
| TIMP2    | 7077   |
| TIMP3    | 7078   |
| TLR10    | 81793  |
| TLR1     | 7096   |
| TLR4     | 7099   |
| TLR5     | 7100   |
| TLR7     | 51284  |
| TLR8     | 51311  |
| TLR9     | 54106  |
| TM4SF18  | 116441 |
| TM6SF1   | 53346  |
| DCSTAMP  | 81501  |
| TMC8     | 147138 |
| TMEM106A | 113277 |

|                 |           |
|-----------------|-----------|
| TMEM119         | 338773    |
| TMEM140         | 55281     |
| IGFLR1          | 79713     |
| TMEM150B        | 284417    |
| TMEM156         | 80008     |
| TMEM170B        | 100113407 |
| TMEM176A        | 55365     |
| TMEM176B        | 28959     |
| TMEM200A        | 114801    |
| TMEM204         | 79652     |
| TMEM229B        | 161145    |
| TMEM233         | 387890    |
| TMEM26          | 219623    |
| TMEM47          | 83604     |
| TMEM79          | 84283     |
| SYNDIG1         | 79953     |
| TMIGD2          | 126259    |
| TNF             | 7124      |
| TNFAIP6         | 7130      |
| TNFAIP8L2       | 79626     |
| TNFRSF10A       | 8797      |
| TNFRSF10B       | 8795      |
| TNFRSF10C       | 8794      |
| TNFRSF10D       | 8793      |
| TNFRSF11A       | 8792      |
| TNFRSF11B       | 4982      |
| TNFRSF12A       | 51330     |
| TNFRSF13B       | 23495     |
| TNFRSF13C       | 115650    |
| TNFRSF14        | 8764      |
| TNFRSF17        | 608       |
| TNFRSF18        | 8784      |
| TNFRSF1A        | 7132      |
| TNFRSF1B        | 7133      |
| TNFRSF25        | 8718      |
| TNFRSF4         | 7293      |
| TNFRSF6B        | 8771      |
| TNFRSF8         | 943       |
| TNFRSF9         | 3604      |
| TNFSF10         | 8743      |
| TNFSF11         | 8600      |
| TNFSF12         | 8742      |
| TNFSF12-TNFSF13 | 407977    |
| TNFSF13         | 8741      |
| TNFSF13B        | 10673     |
| TNFSF14         | 8740      |
| TNFSF15         | 9966      |
| TNFSF18         | 8995      |
| TNFSF4          | 7292      |
| TNFSF8          | 944       |
| TNFSF9          | 8744      |
| TNIK            | 23043     |

|          |        |
|----------|--------|
| TNIP3    | 79931  |
| TNN      | 63923  |
| TNNT2    | 7139   |
| TNS3     | 64759  |
| TOX      | 9760   |
| TPK1     | 27010  |
| TPSAB1   | 7177   |
| TPSB2    | 64499  |
| TPSD1    | 23430  |
| TPSG1    | 25823  |
| TRAF1    | 7185   |
| TRAF3IP3 | 80342  |
| TRANK1   | 9881   |
| TRAT1    | 50852  |
| TREM1    | 54210  |
| TREM2    | 54209  |
| TREML1   | 340205 |
| TRIM21   | 6737   |
| TRIM22   | 10346  |
| TRIM61   | 391712 |
| TRPC4AP  | 26133  |
| TRPV2    | 51393  |
| TRPV3    | 162514 |
| TSHR     | 7253   |
| TSHZ3    | 57616  |
| TSLP     | 85480  |
| TSPAN11  | 441631 |
| TSPAN32  | 10077  |
| TSPAN4   | 7106   |
| TTBK2    | 146057 |
| TTC16    | 158248 |
| TTC21B   | 79809  |
| TTC24    | 164118 |
| TTC37    | 9652   |
| TUBA4A   | 7277   |
| TUBB6    | 84617  |
| TXK      | 7294   |
| NME8     | 51314  |
| TYMP     | 1890   |
| TYROBP   | 7305   |
| UBA7     | 7318   |
| UBASH3A  | 53347  |
| UBD      | 10537  |
| UBE2L6   | 9246   |
| UBR1     | 197131 |
| UBXN11   | 91544  |
| UBXN1    | 51035  |
| UCP2     | 7351   |
| UHMK1    | 127933 |
| ULBP1    | 80329  |
| ULBP2    | 80328  |
| ULBP3    | 79465  |

|         |        |
|---------|--------|
| UNC13D  | 201294 |
| UNC5C   | 8633   |
| UNC93B1 | 81622  |
| USHBP1  | 83878  |
| USP12   | 219333 |
| USP51   | 158880 |
| UTS2    | 10911  |
| VAMP5   | 10791  |
| VASH1   | 22846  |
| VAV1    | 7409   |
| VCAM1   | 7412   |
| VCAN    | 1462   |
| VEGFA   | 7422   |
| VEGFB   | 7423   |
| VEGFC   | 7424   |
| VENTX   | 27287  |
| VGLL3   | 389136 |
| VIM     | 7431   |
| VMO1    | 284013 |
| VNN2    | 8875   |
| VPREB3  | 29802  |
| VPS37D  | 155382 |
| VSIG4   | 11326  |
| VWF     | 7450   |
| WARS    | 7453   |
| WAS     | 7454   |
| WDFY4   | 57705  |
| WFDC12  | 128488 |
| WIPF1   | 7456   |
| WISP1   | 8840   |
| WNT2    | 7472   |
| XAF1    | 54739  |
| XBP1    | 7494   |
| XCL1    | 6375   |
| XCL2    | 6846   |
| XCR1    | 2829   |
| XKR8    | 55113  |
| XPNPEP2 | 7512   |
| ZAP70   | 7535   |
| ZBP1    | 81030  |
| ZBTB10  | 65986  |
| ZBTB32  | 27033  |
| ZC3H12D | 340152 |
| ZCCHC24 | 219654 |
| ZDHHC20 | 253832 |
| ZEB1    | 6935   |
| ZEB2    | 9839   |
| ZFPM2   | 23414  |
| ZKSCAN1 | 7586   |
| ZMYND15 | 84225  |
| ZNF185  | 7739   |
| ZKSCAN8 | 7745   |

|         |        |
|---------|--------|
| ZNF215  | 7762   |
| ZNF366  | 167465 |
| ZNF423  | 23090  |
| ZNF469  | 84627  |
| ZNF521  | 25925  |
| ZNF620  | 253639 |
| ZNF660  | 285349 |
| ZNF671  | 79891  |
| ZNF683  | 257101 |
| ZNF804A | 91752  |
| ZNF80   | 7634   |
| ZNF827  | 152485 |
| ZNF831  | 128611 |
| ZNF835  | 90485  |
