# Supplementary figures and images for: Analysis of Immune Gene Expression Subtypes Reveals Osteosarcoma Immune Heterogeneity
Source: Hindawi journal article supplement (doi:10.1155/2021/6649412), 2021-03-01

GEO\_OS\_IS

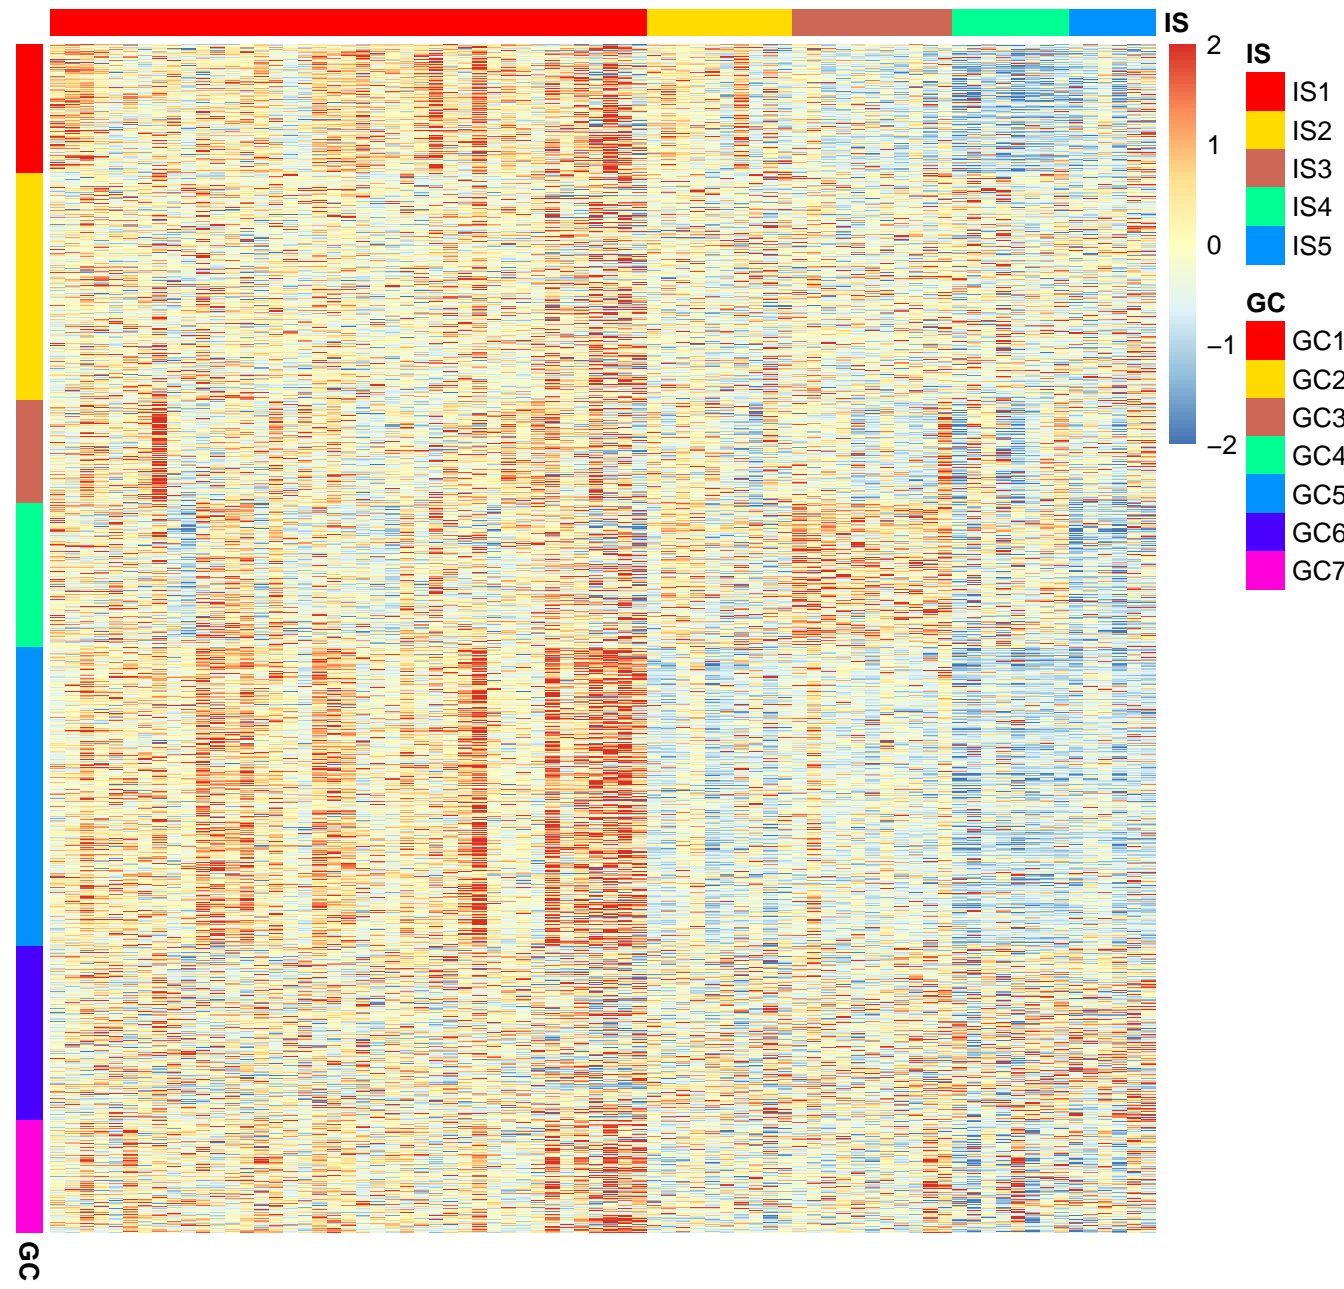

Supplement: f1 [file 6649412.f1.zip]

consensus matrix k=7

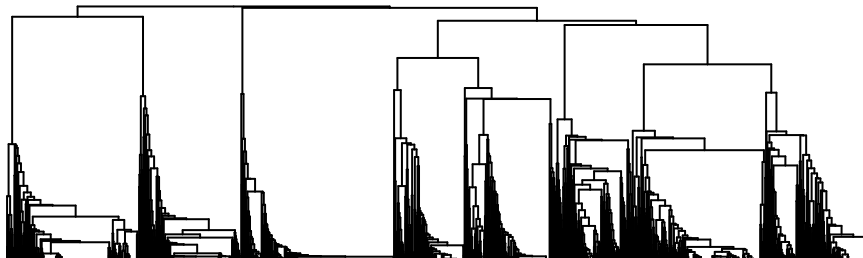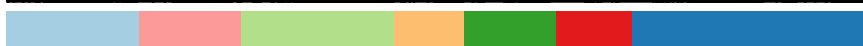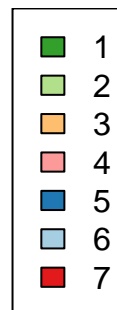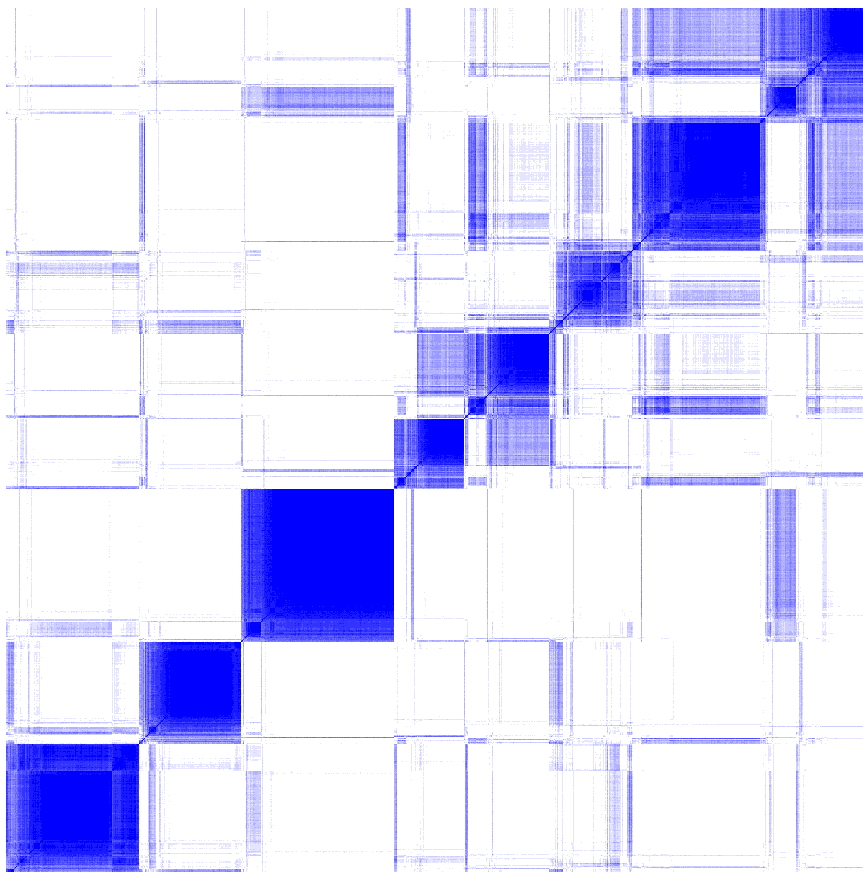

Supplement: f1 [file 6649412.f1.zip]

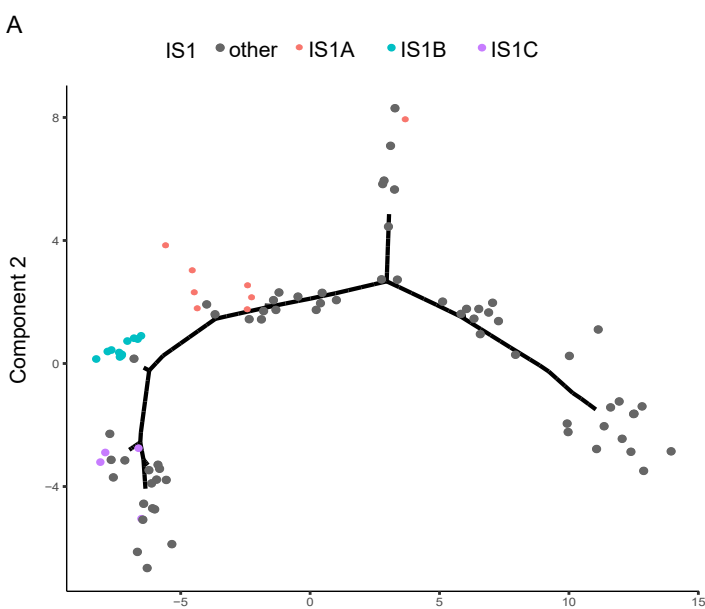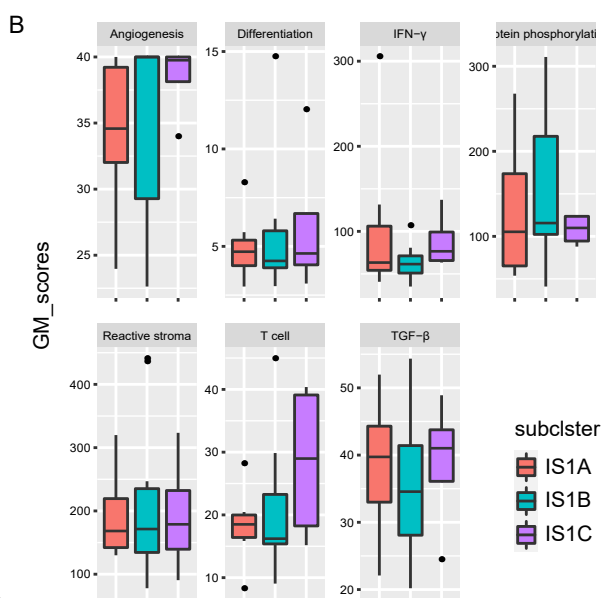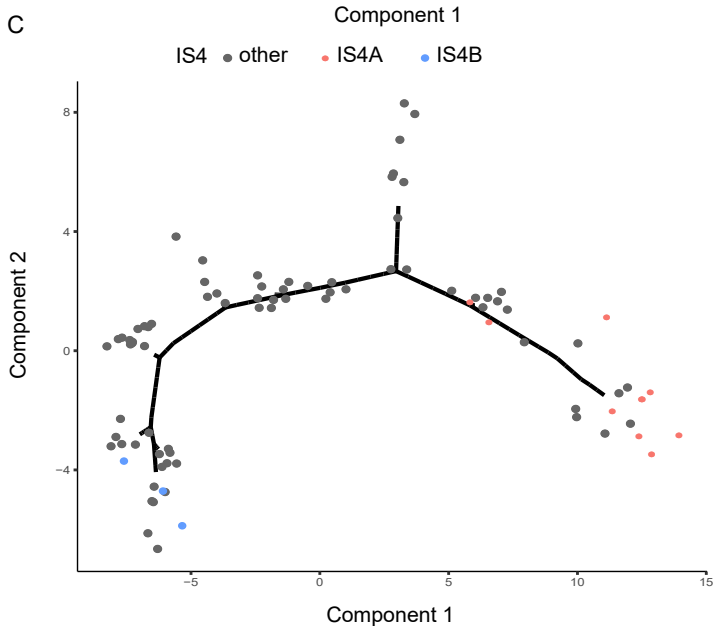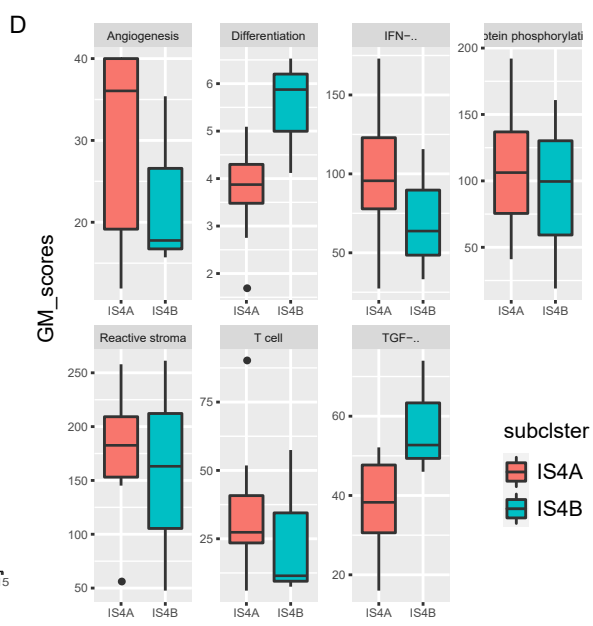

Supplement: f1 [file 6649412.f1.zip]

## TCGA\_OS\_IS

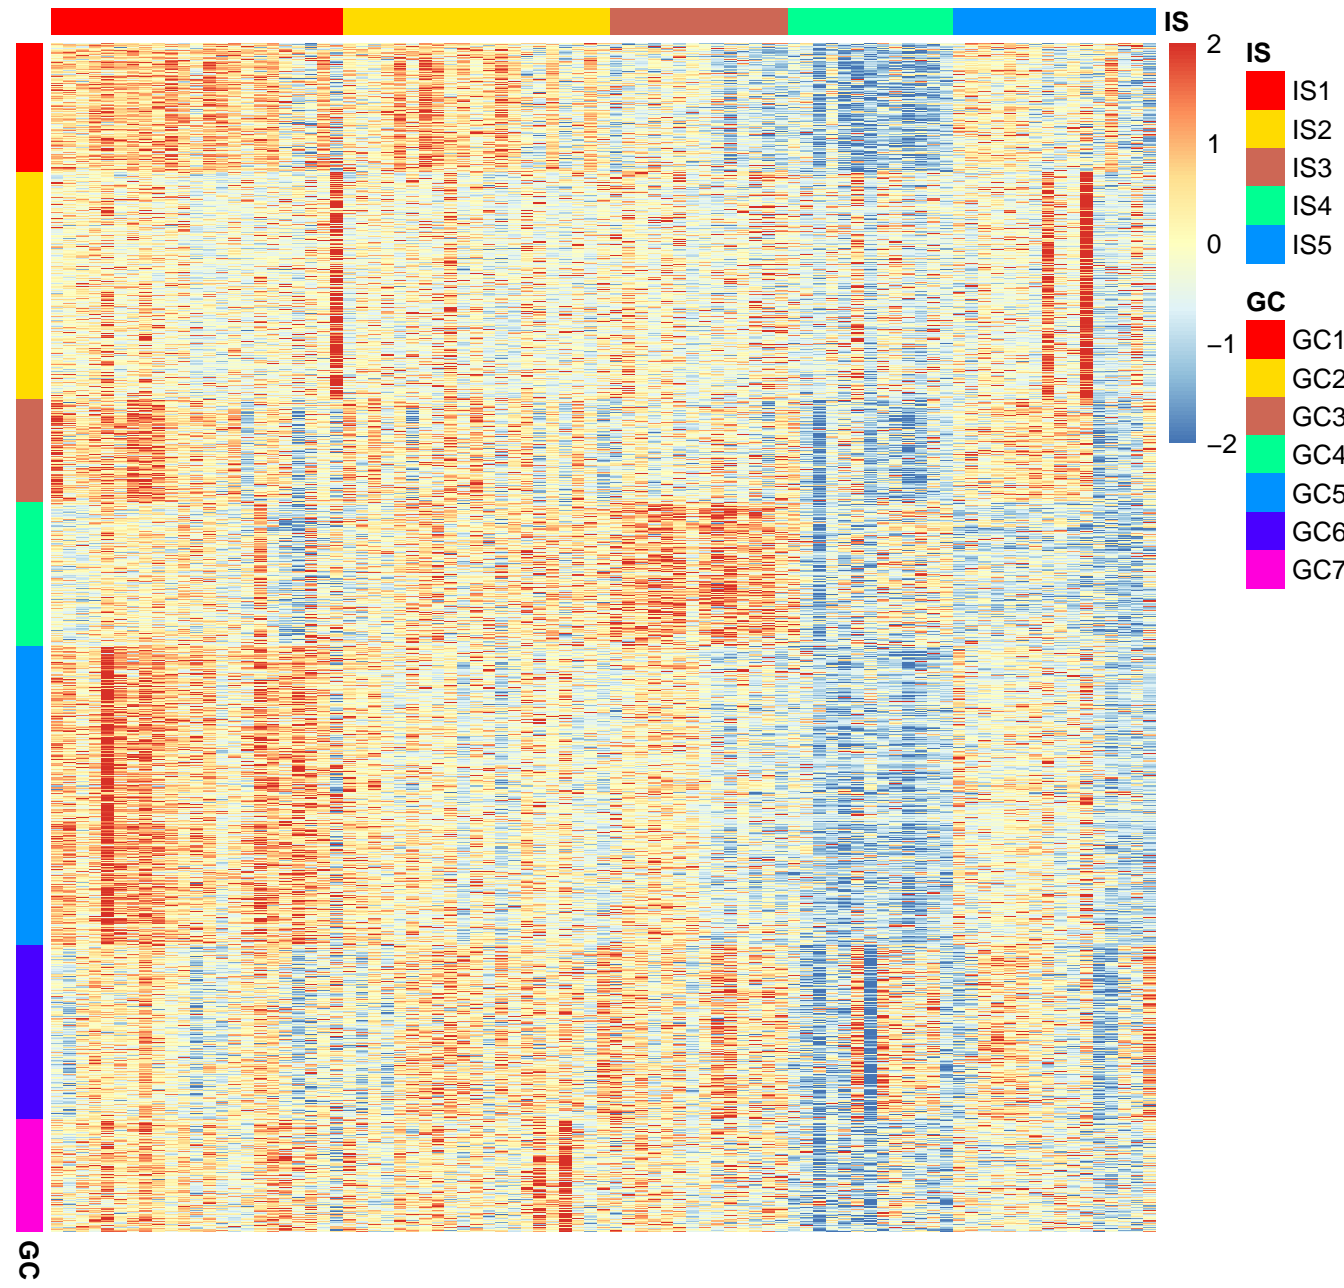

Supplement: f1 [file 6649412.f1.zip]
